# Supplementary material for: A Chiral Relay Race: Stereoselective Synthesis of Axially Chiral Biaryl Diketones through Ring-Opening of Optical Dihydrophenan-threne-9,10-diols
Source: MDPI journal article supplement (doi:10.3390/molecules28165956), 2023-08-08
Supplement: s1 [file s1]

# **A Chiral Relay Race: Stereoselective Synthesis of Axially Chiral**

## **Biaryl Diketones through Ring-Opening of Optical**

### **Dihydrophenanthrene-9,10-diols**

Lei Shi,<sup>1</sup> Jiawei Zhu,<sup>1</sup> Biqiong Hong<sup>2</sup> and Zhenhua Gu<sup>\*1,2</sup>

1. Hefei National Research Center for Physical Sciences at the Microscale and Department of Chemistry, University of Science and Technology of China, 96 Jinzhai Road, Hefei, Anhui 230026, P. R. China

2. College of Materials and Chemical Engineering, Minjiang University, Fuzhou, Fujian, 350108, China

Email: zhgu@ustc.edu.cn

## Free radical capture experiment

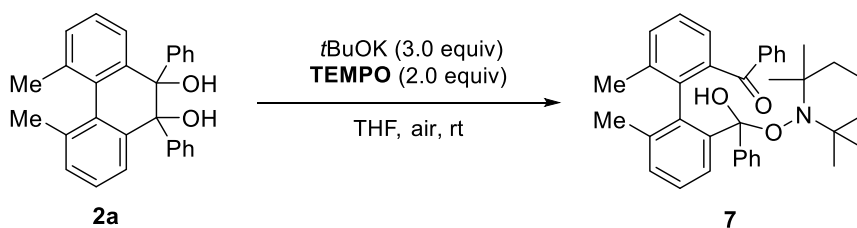

Under air atmosphere, a solution of **2a** (39.2 mg, 0.10 mmol, 1.0 equiv) in THF (2 mL) was added  $t\text{BuOK}$  (33.6 mg, 0.30 mmol, 3.0 equiv) and **TEMPO** (31.3 mg, 0.20 mmol, 2.0 equiv) at room temperature, then the mixture was stirred at the same temperature for 30 min. 0.5 mL of the reaction mixture was taken out and it was passed through a short pad of silica gel. **7** was detected by the analysis of HRMS. HRMS (ESI) calcd for  $\text{C}_{37}\text{H}_{42}\text{NO}_3$   $[\text{M}+\text{H}]^+$  548.3159, found 548.3168. HRMS (ESI) calcd for  $\text{C}_{37}\text{H}_{41}\text{NO}_3\text{Na}$   $[\text{M}+\text{Na}]^+$  570.2979, found 570.2992.

# Copies of NMR Spectroscopies

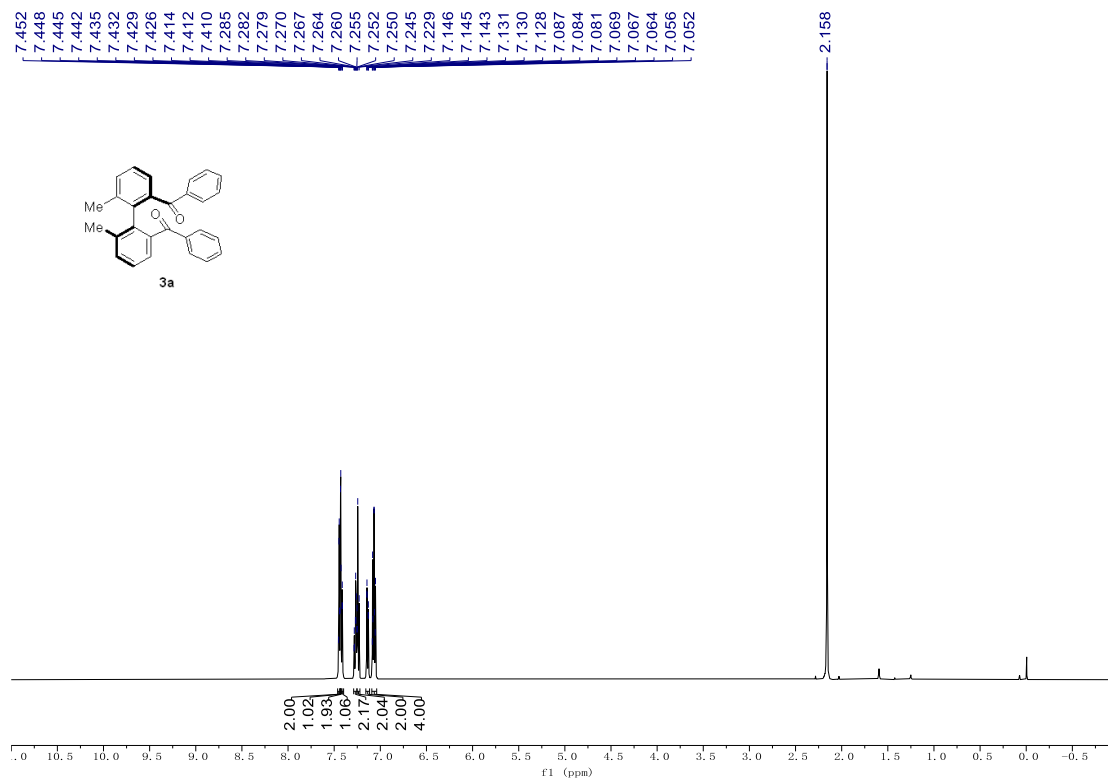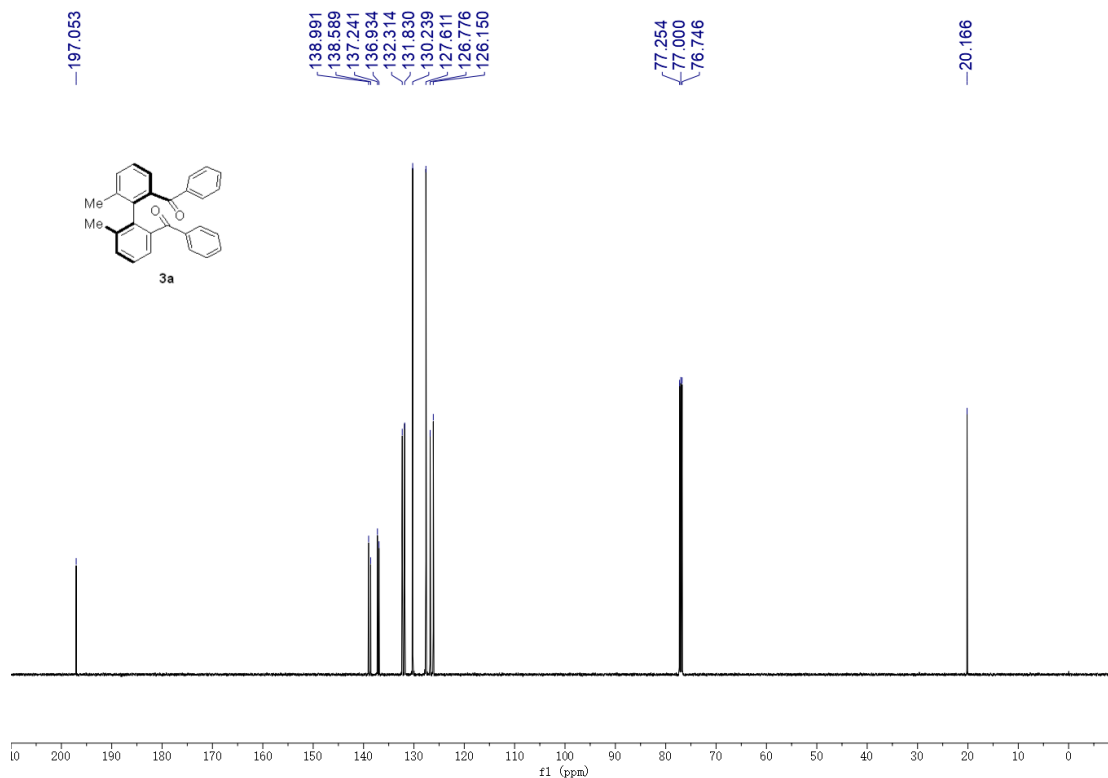

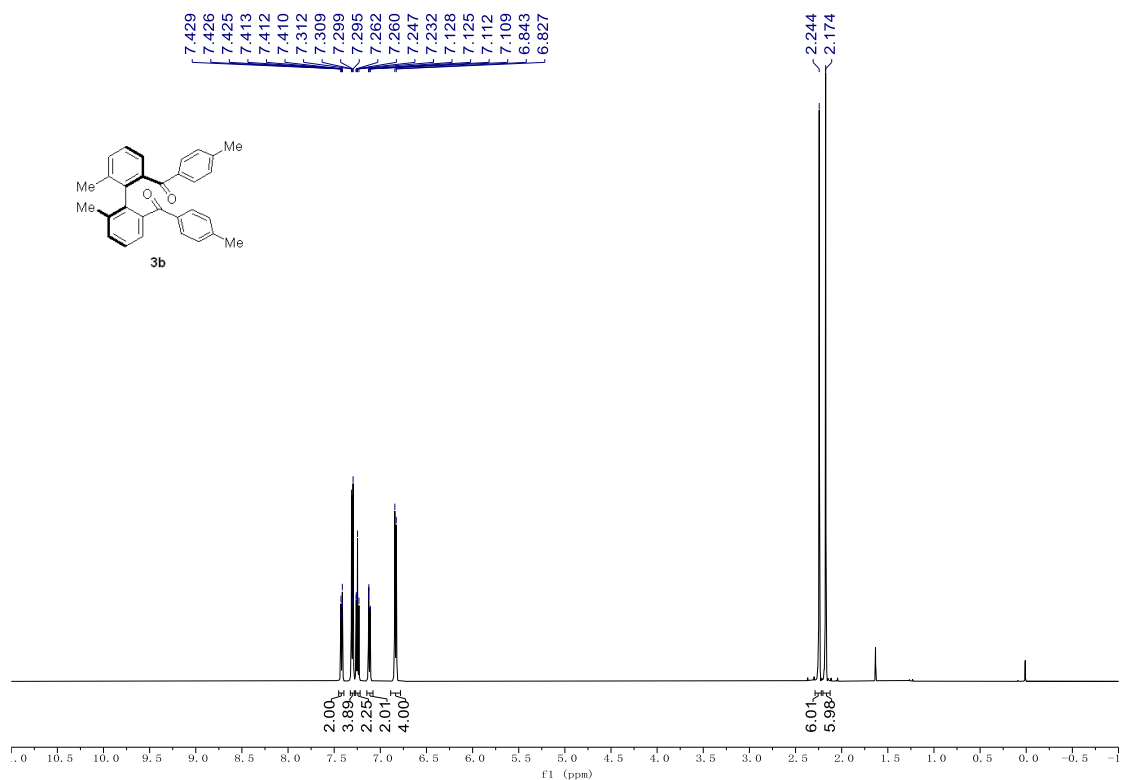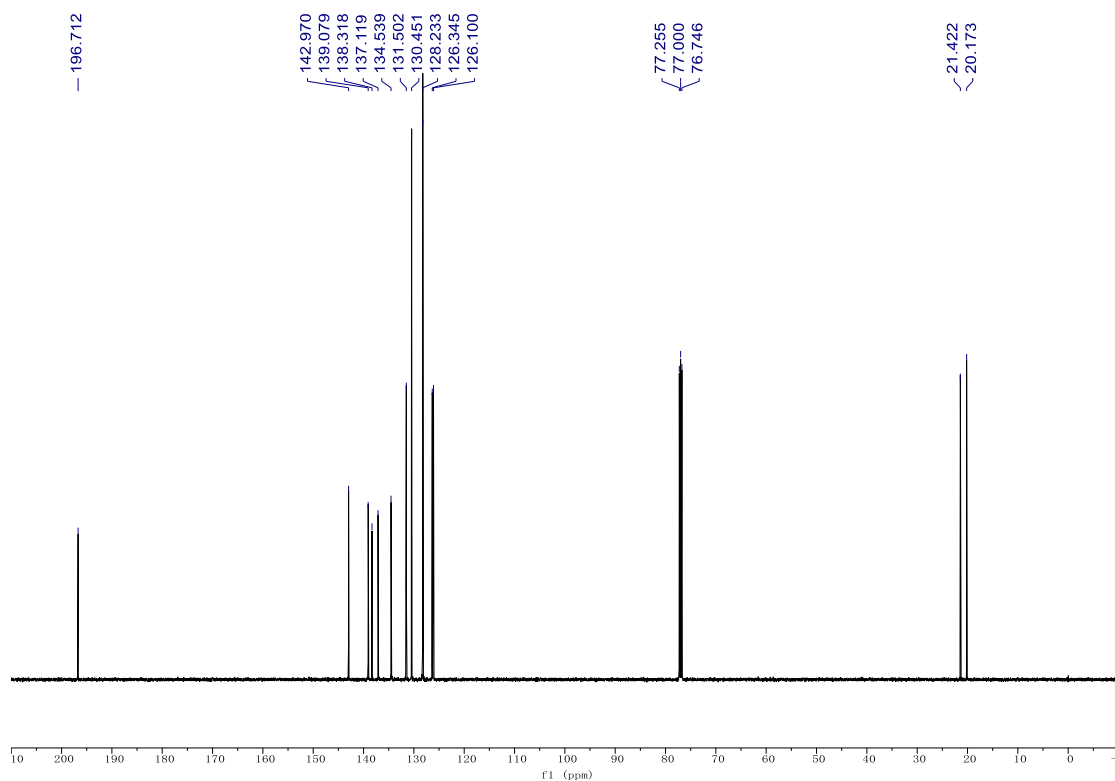



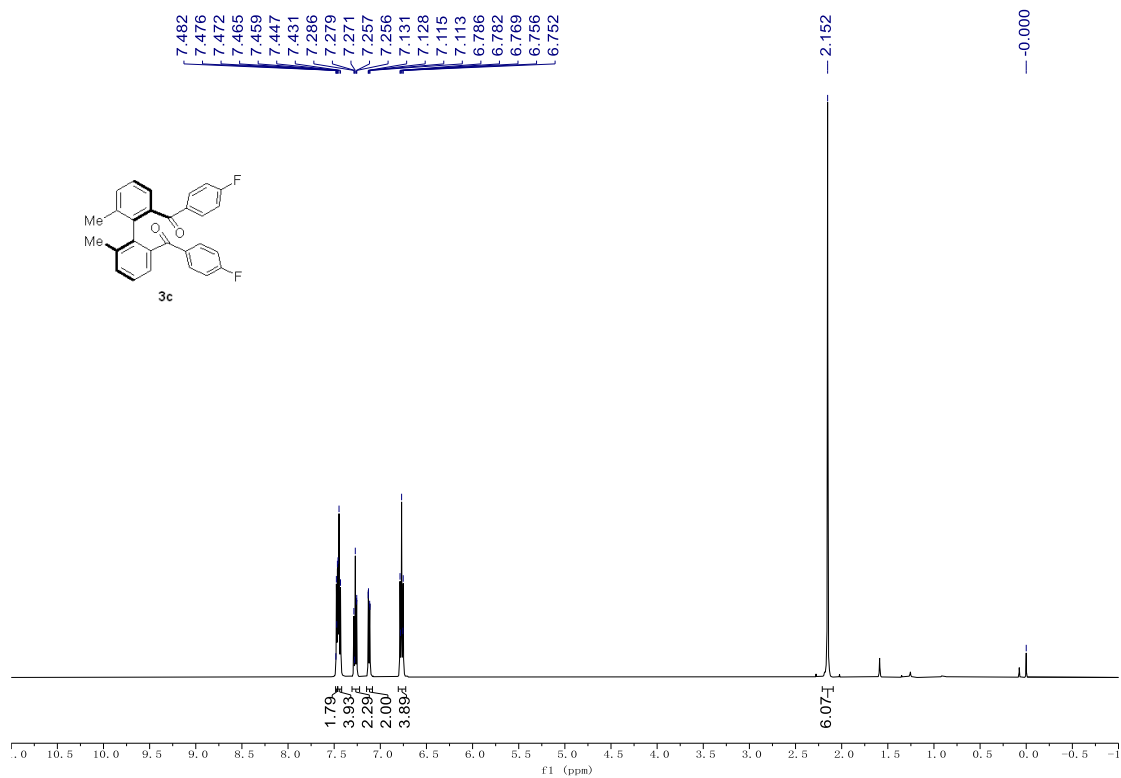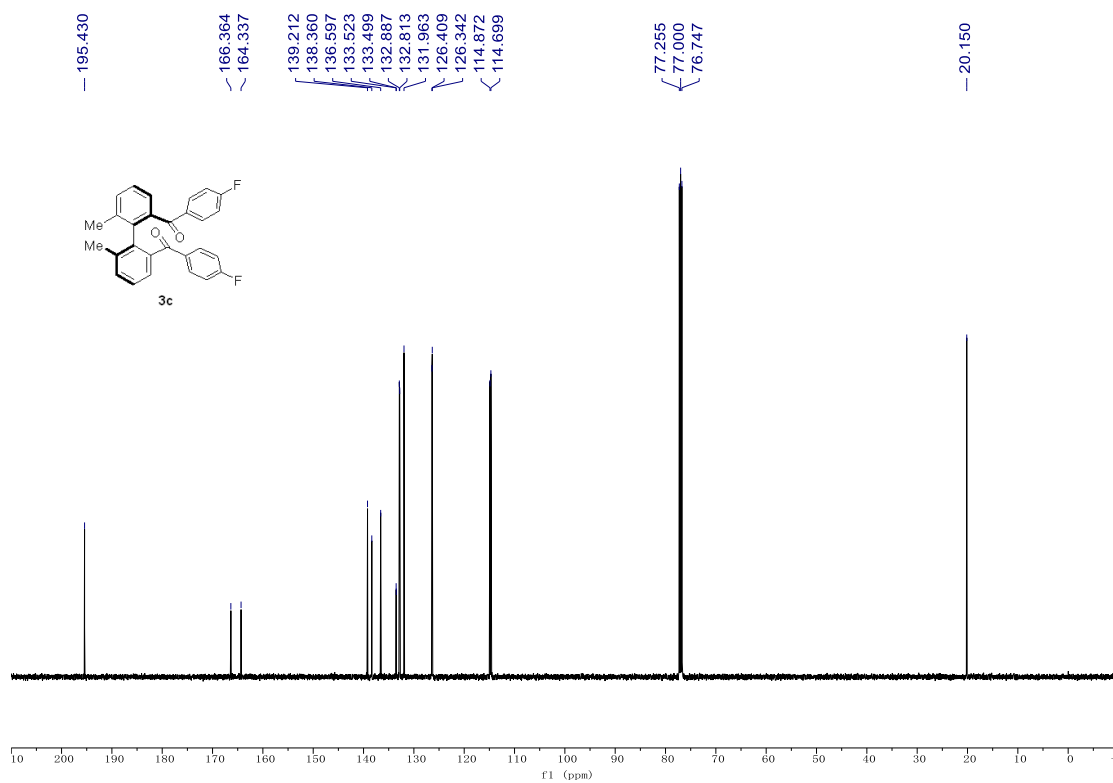

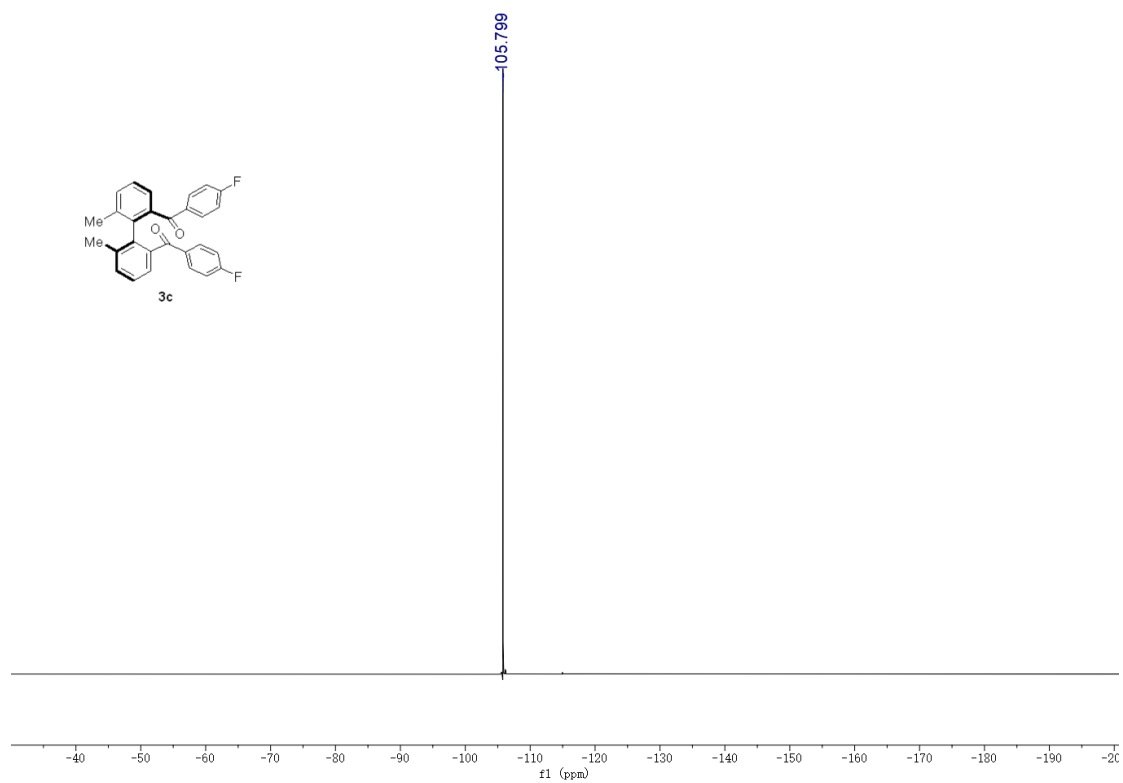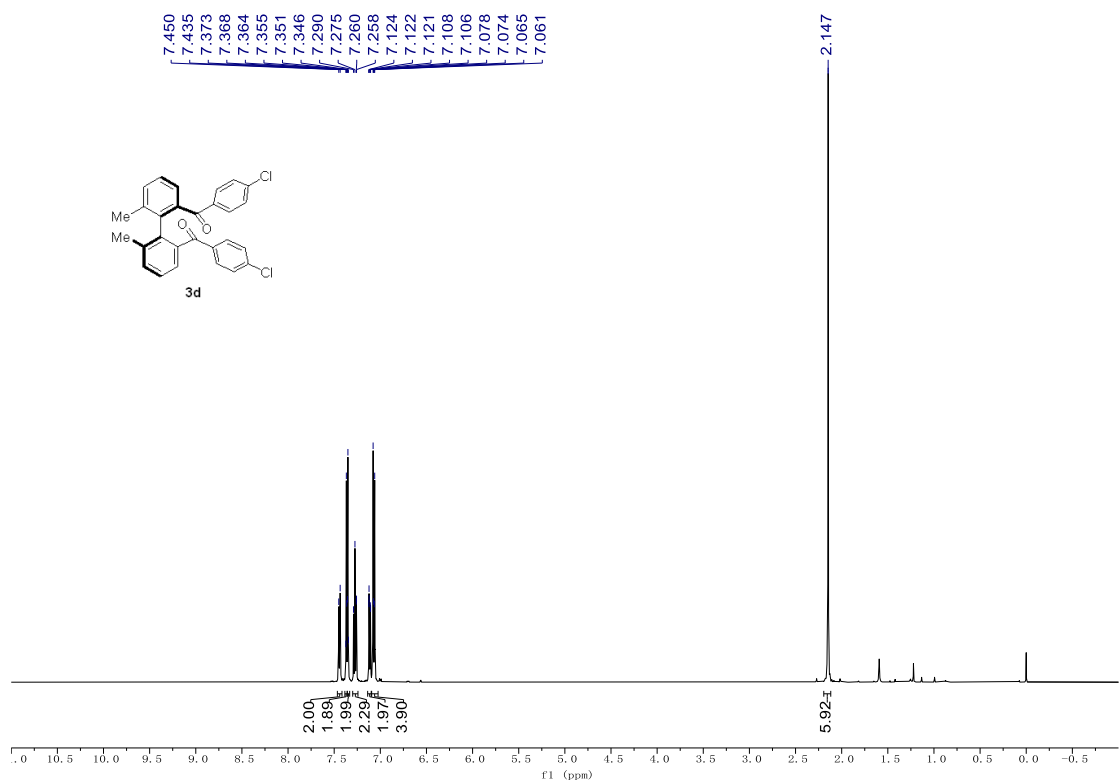

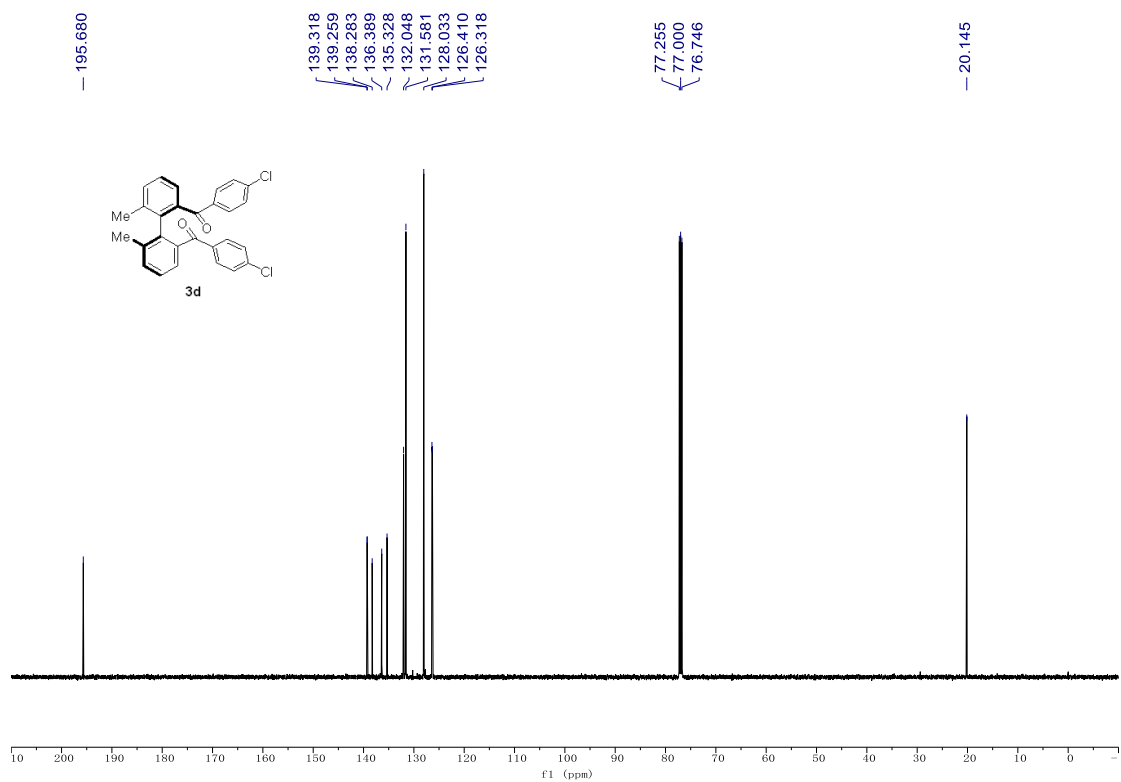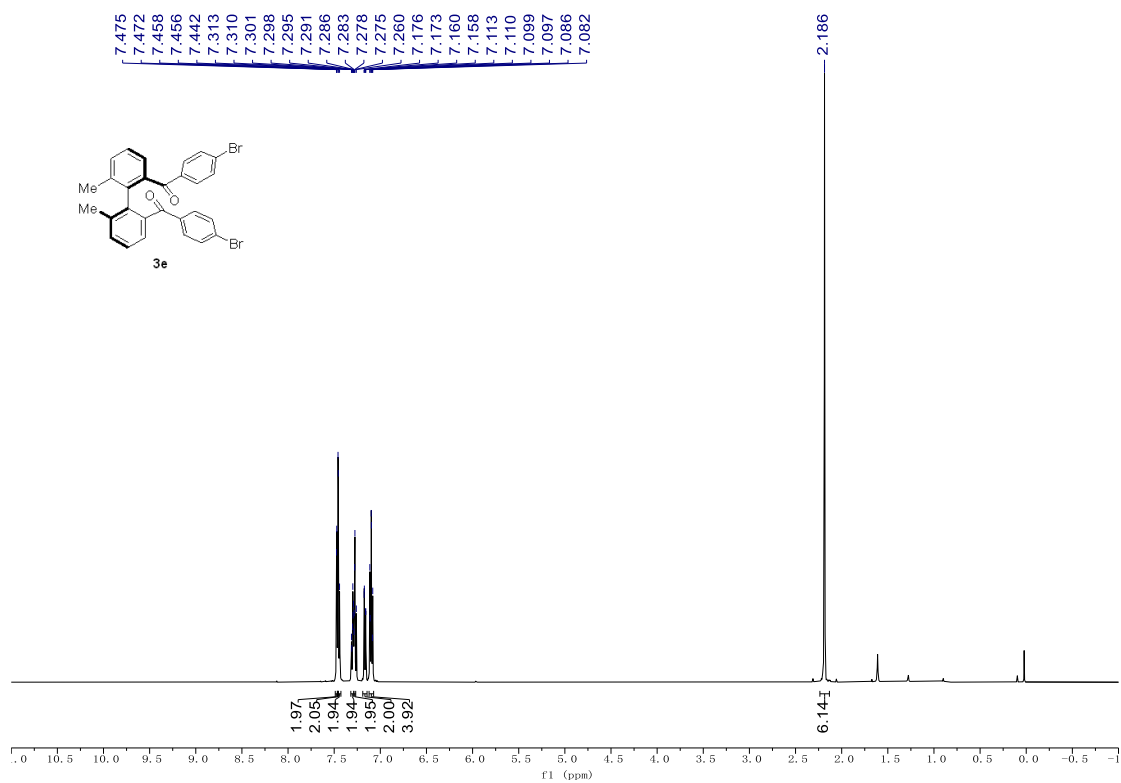

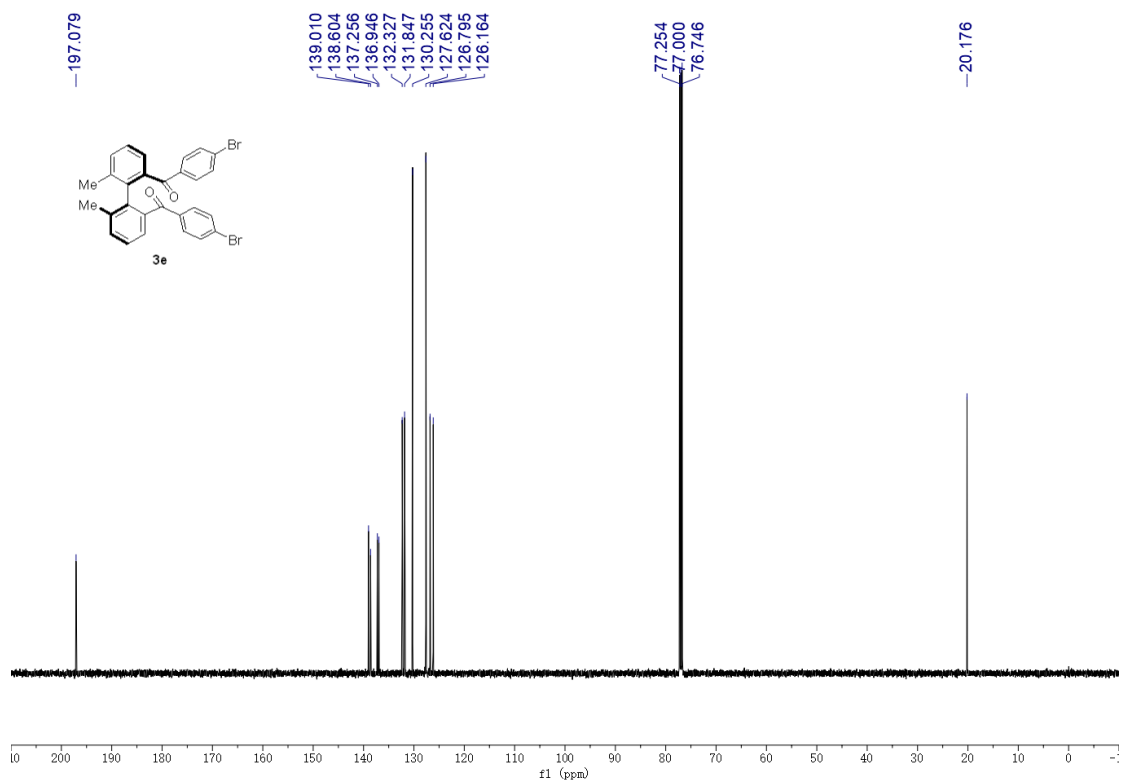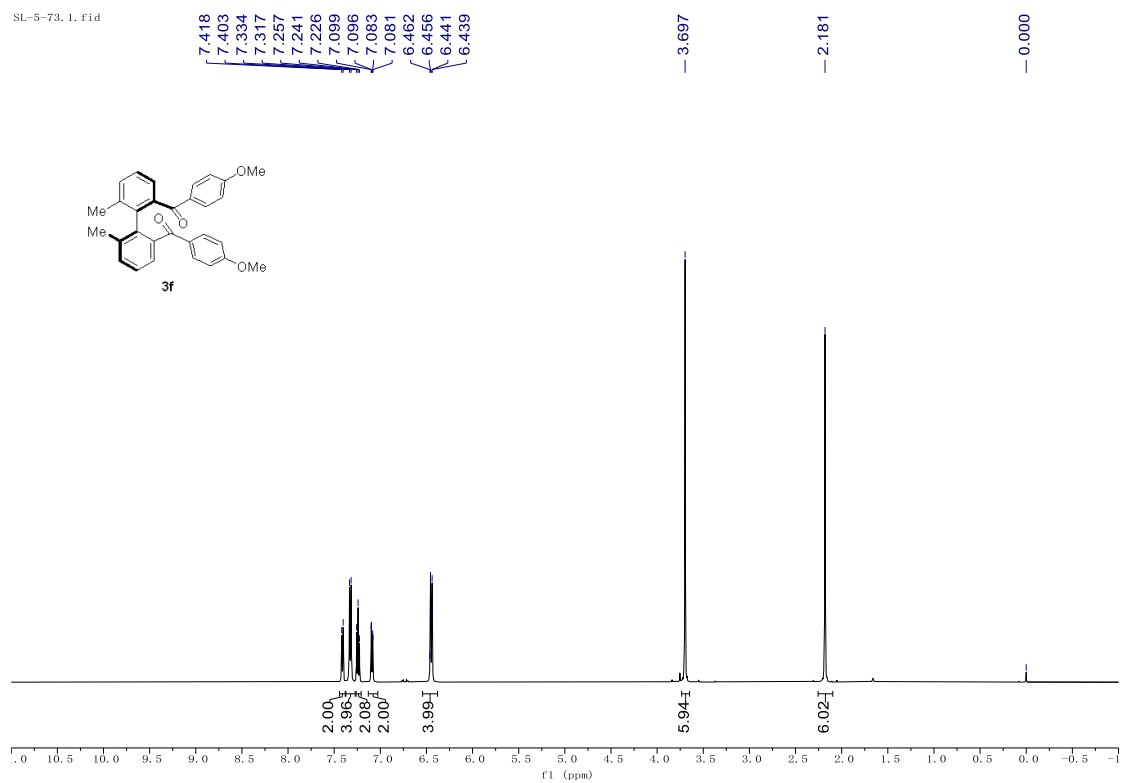

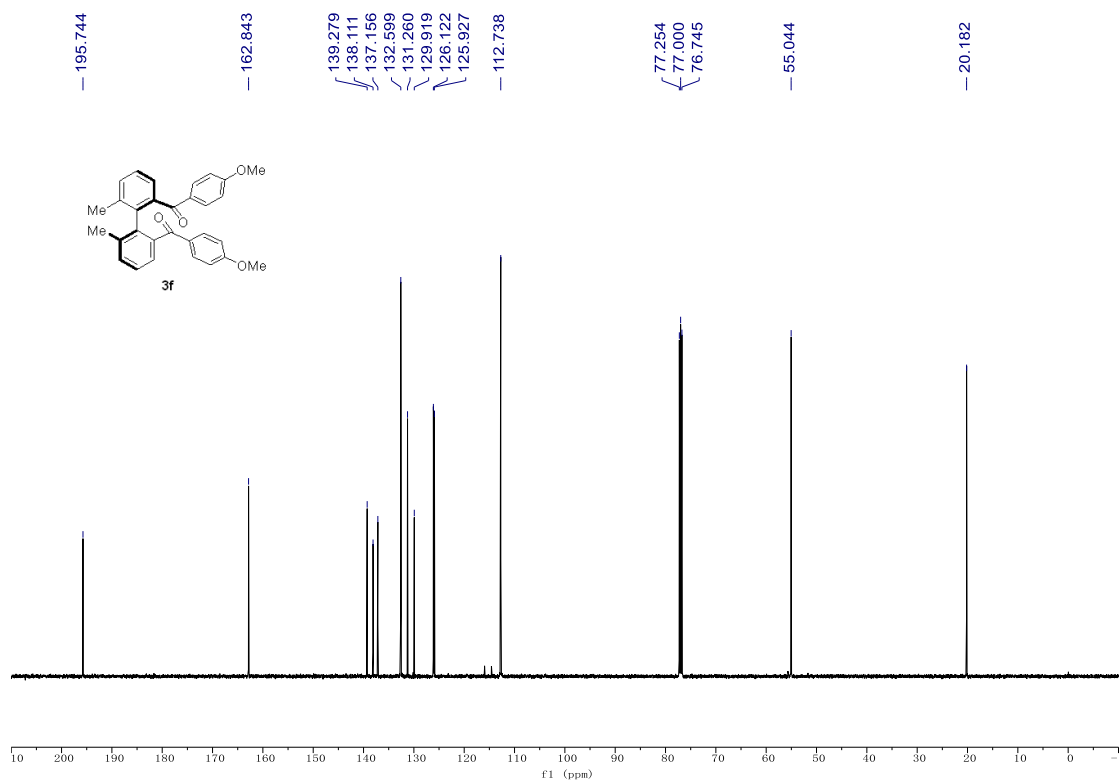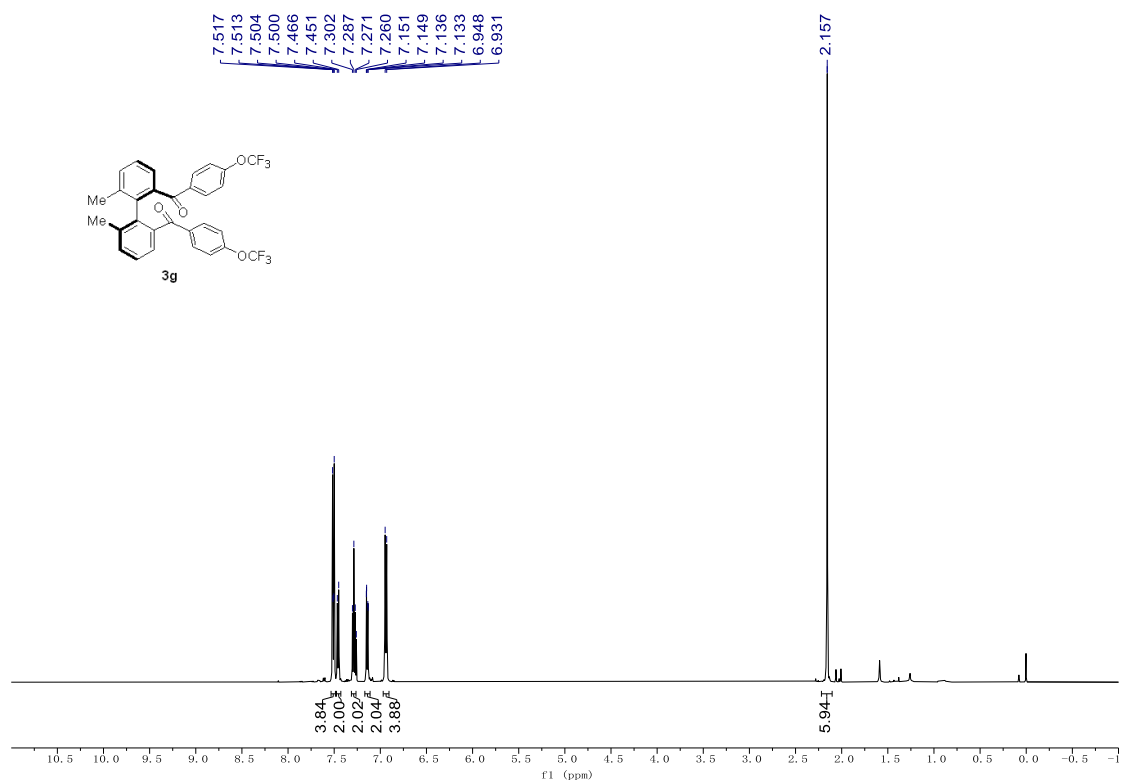

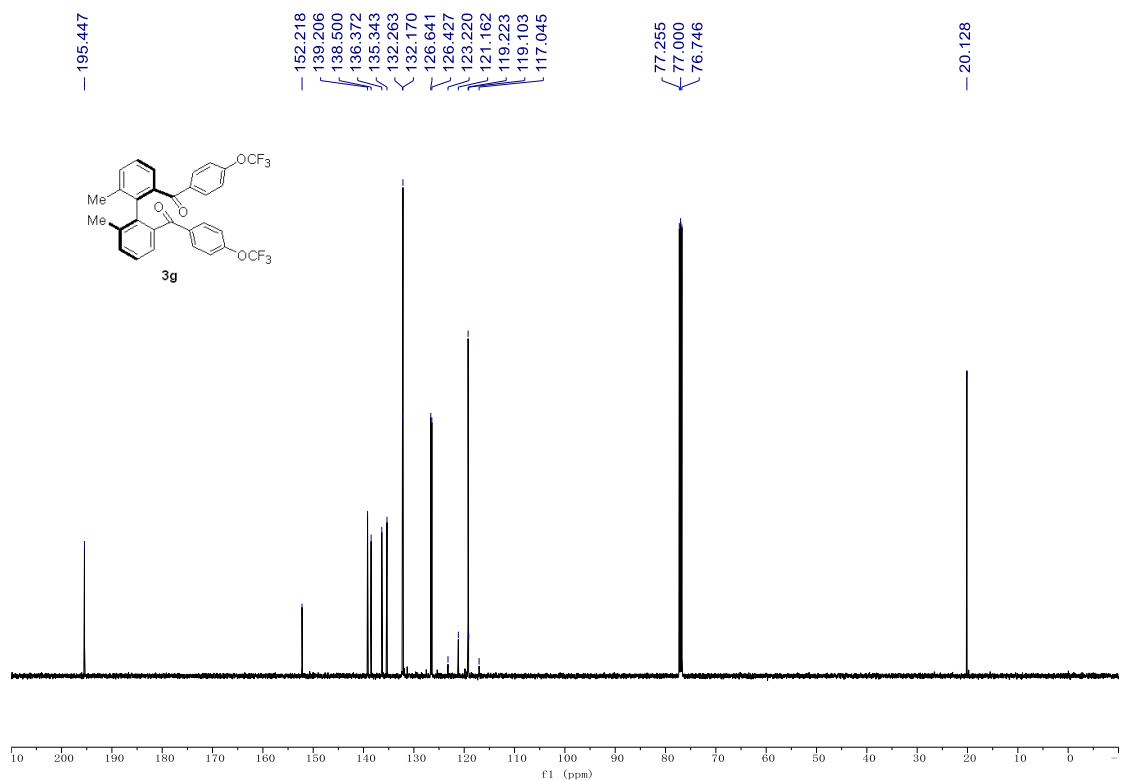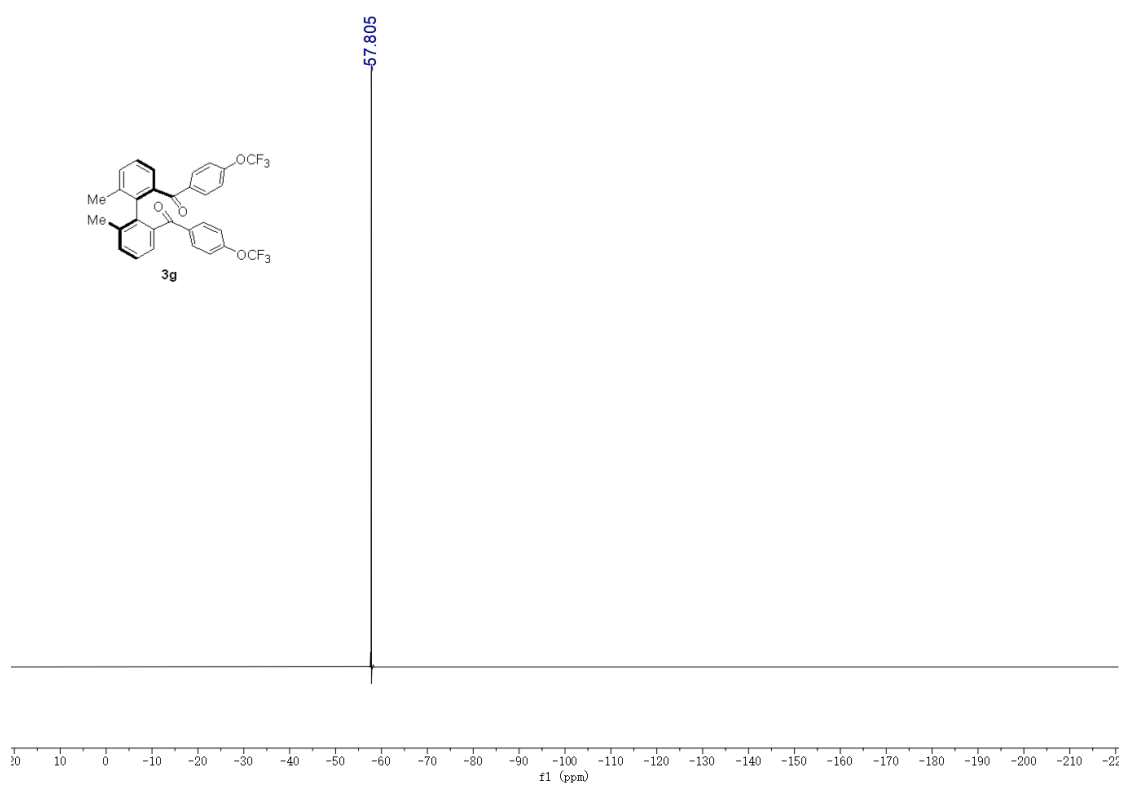

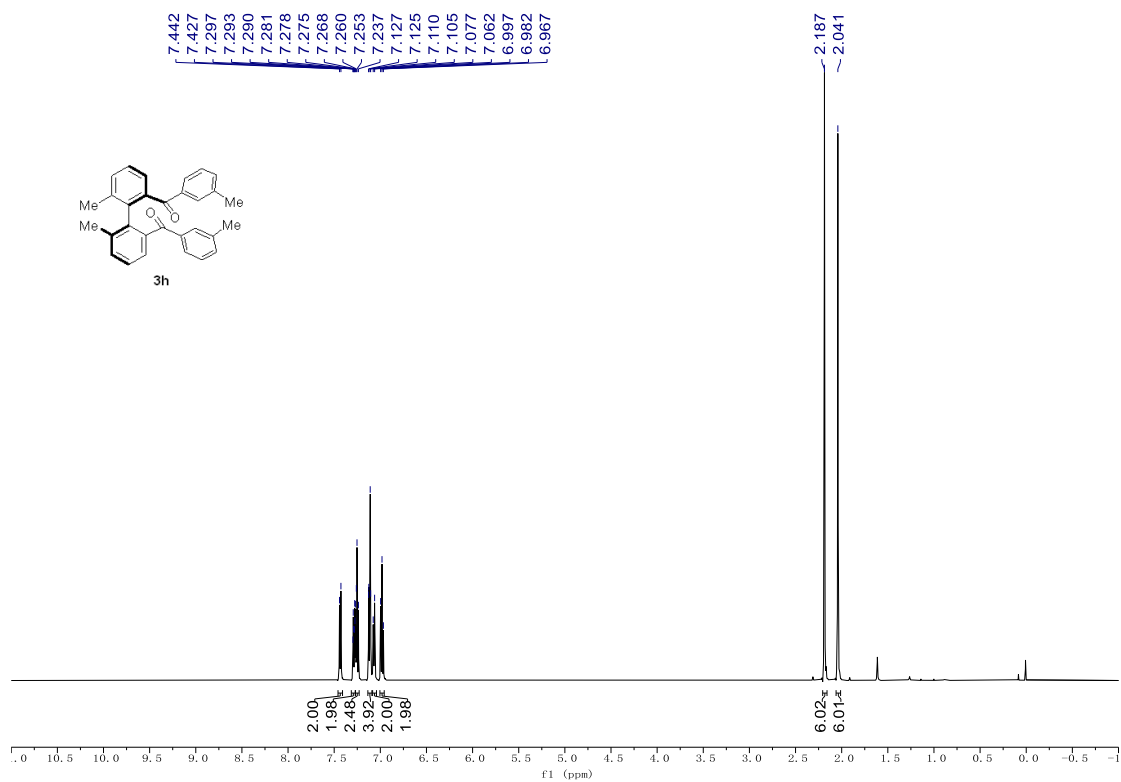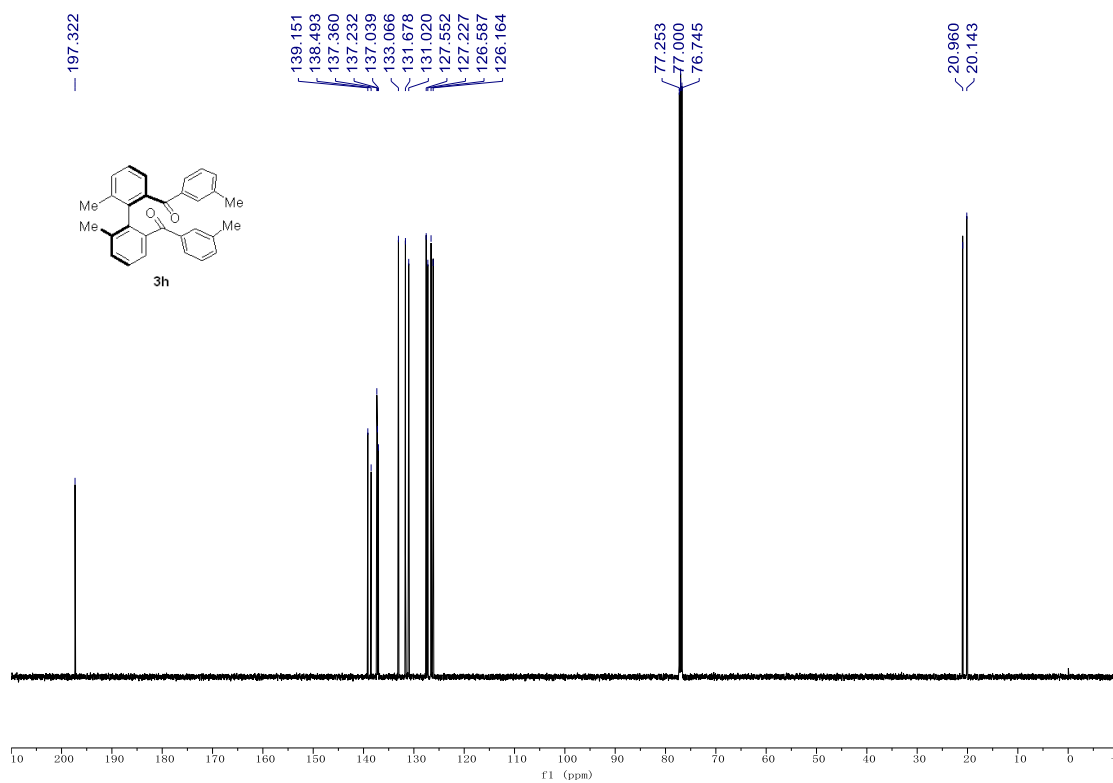

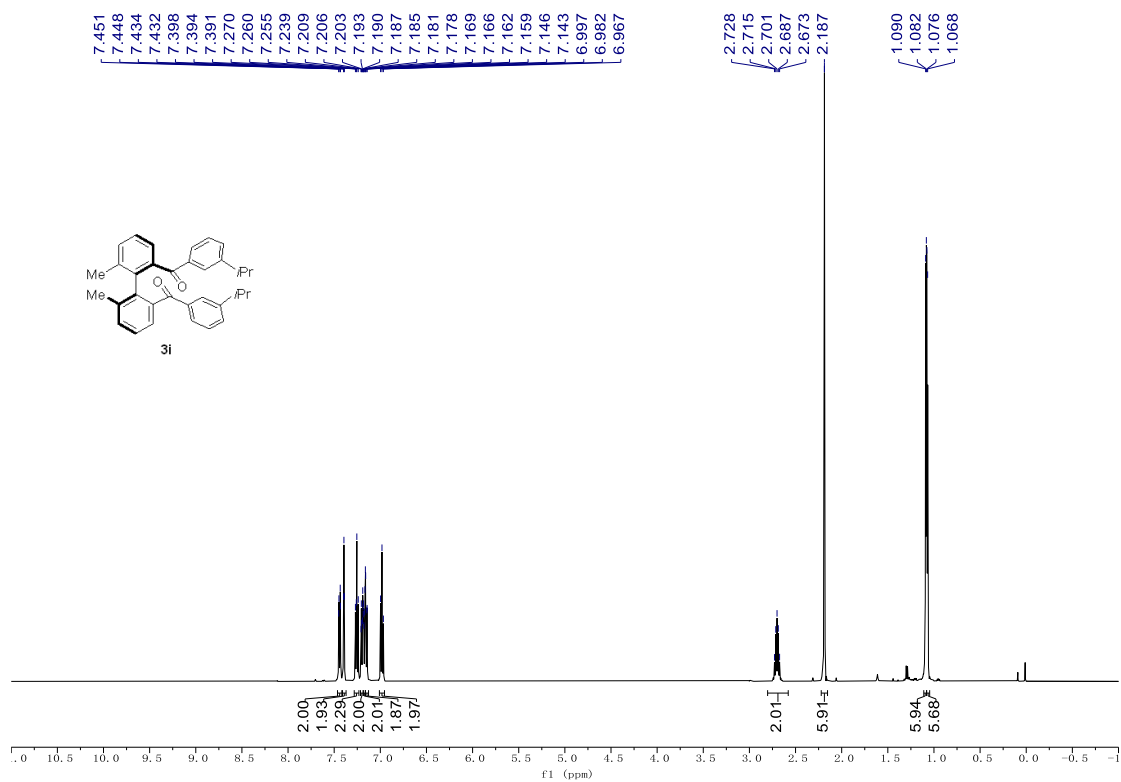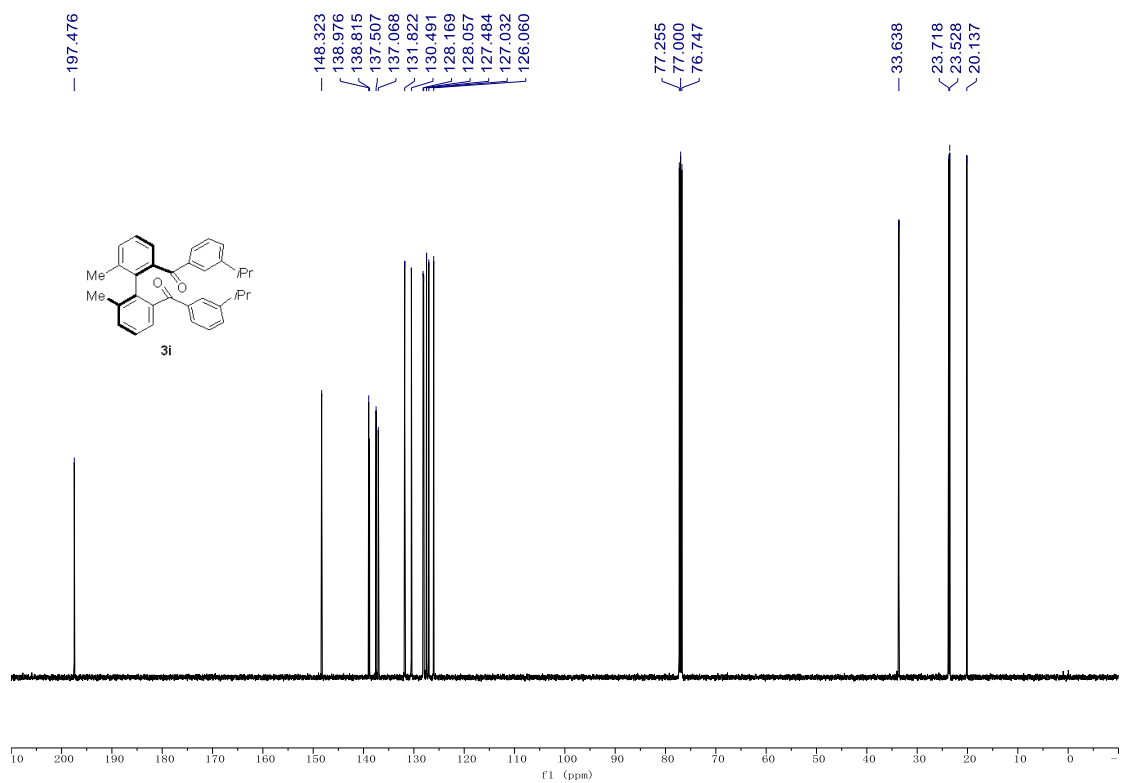



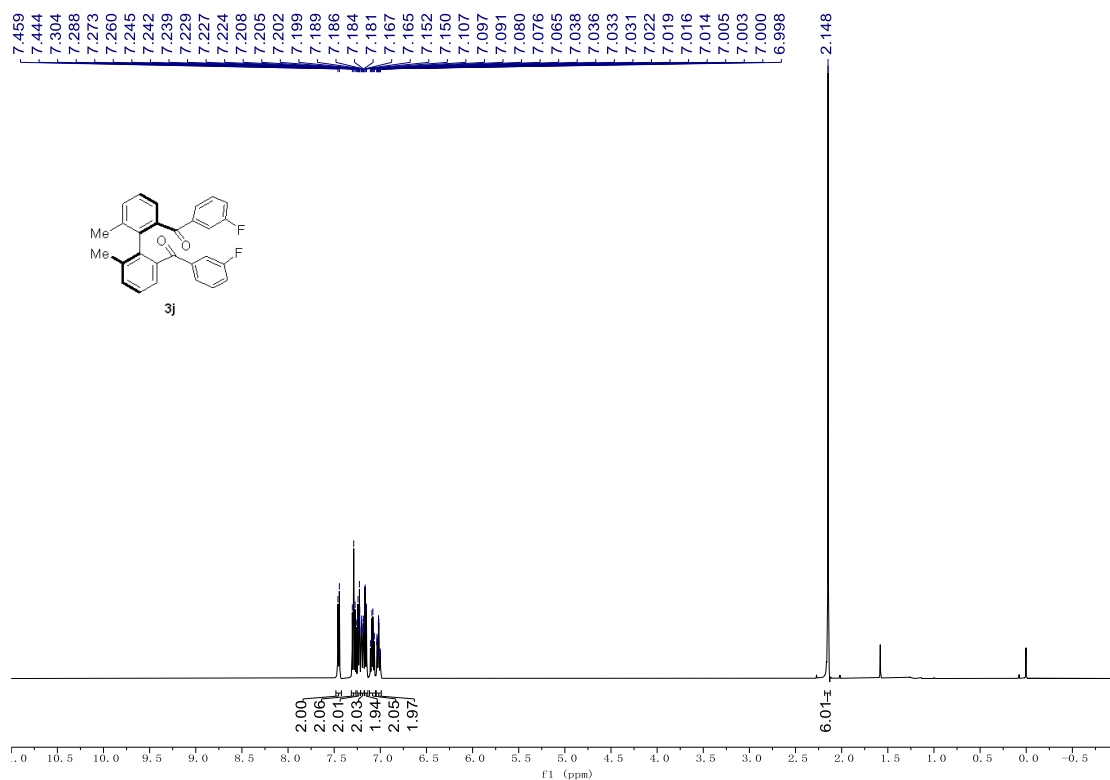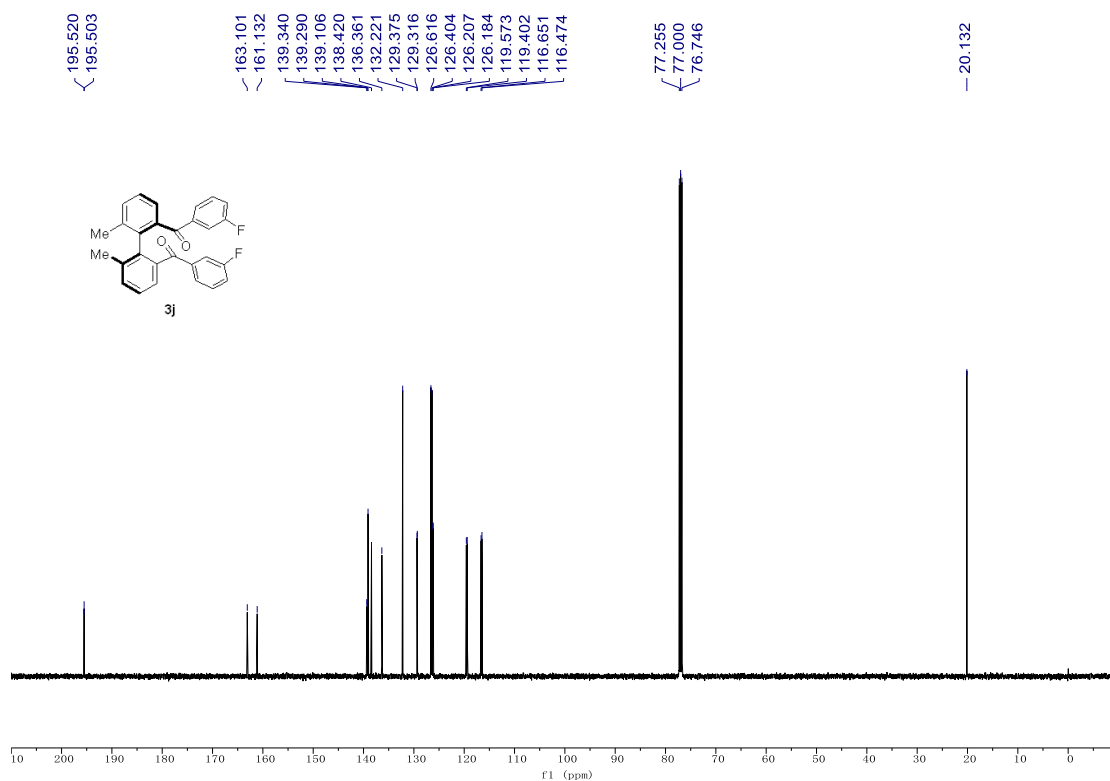

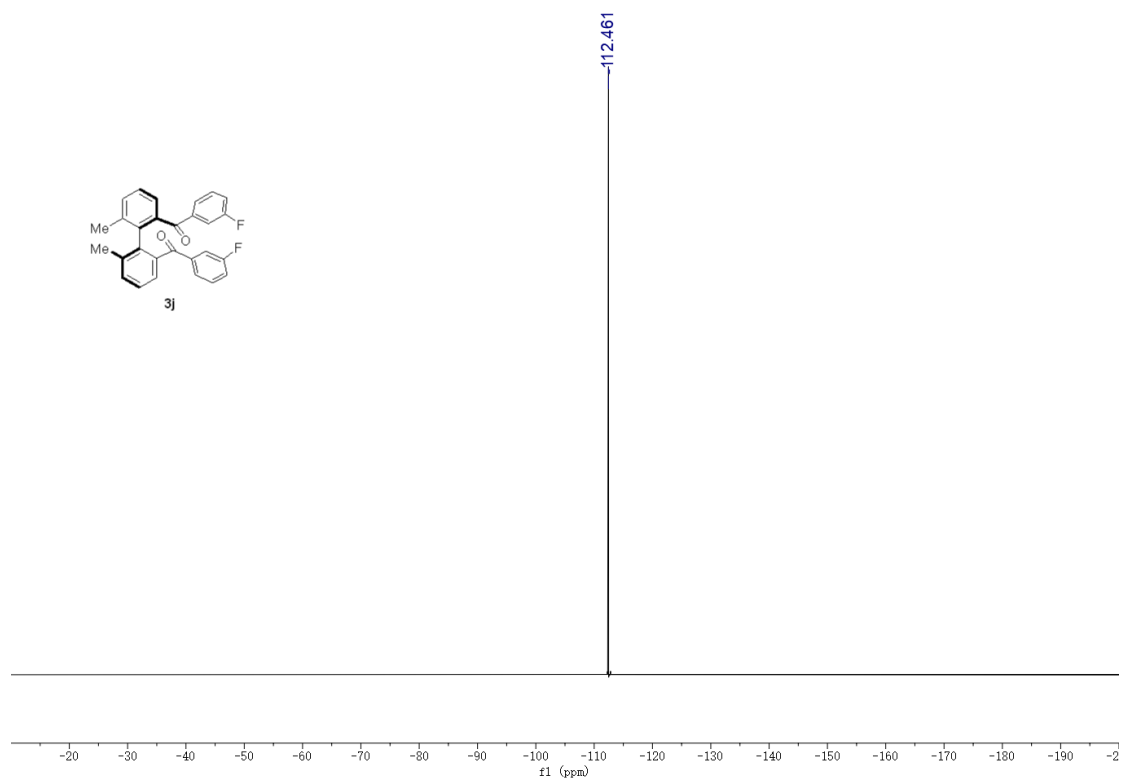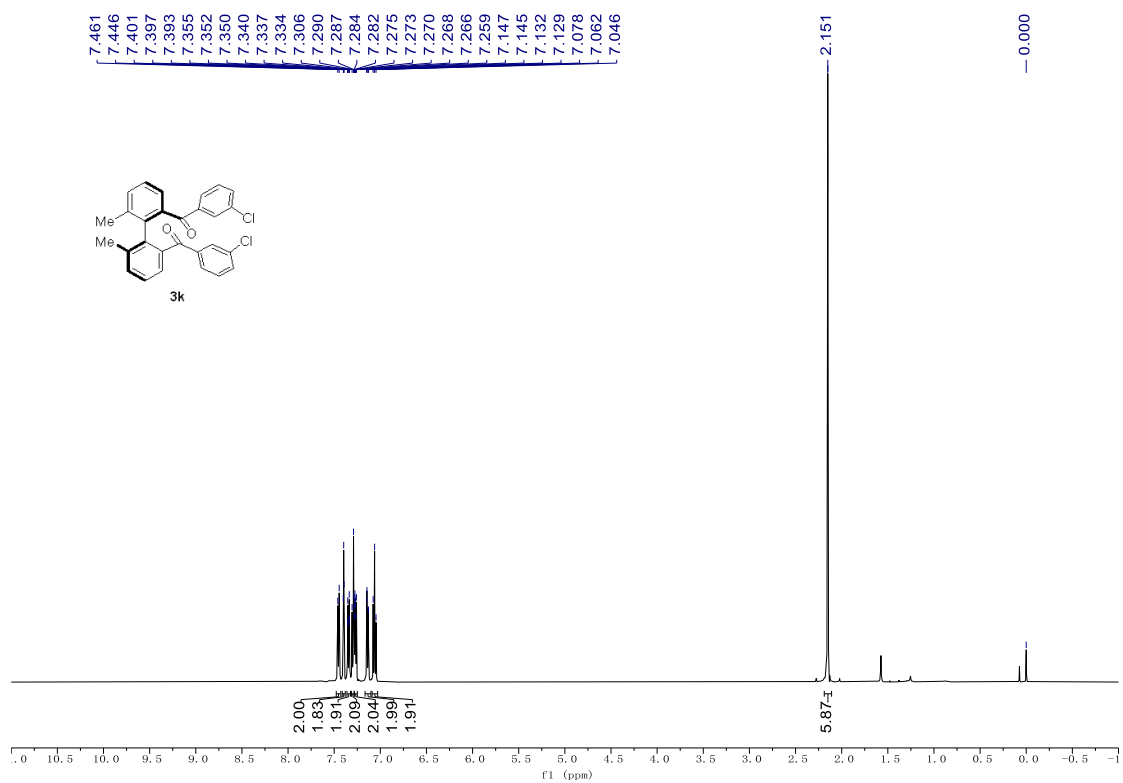



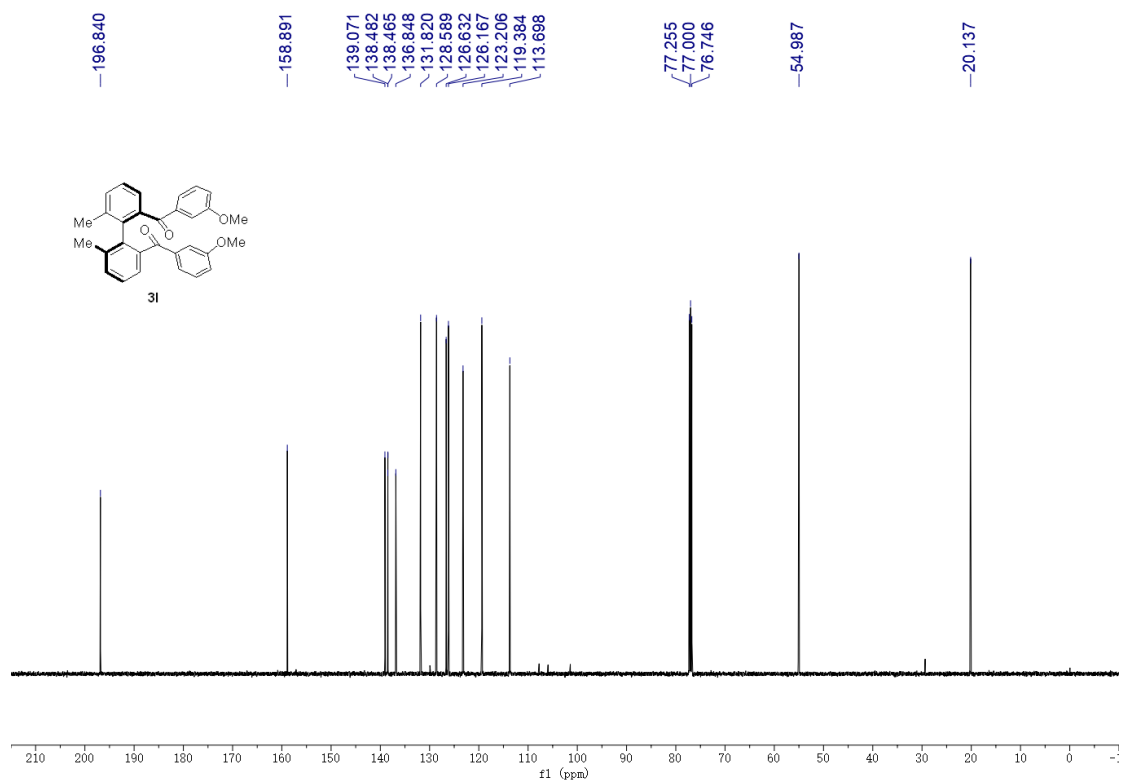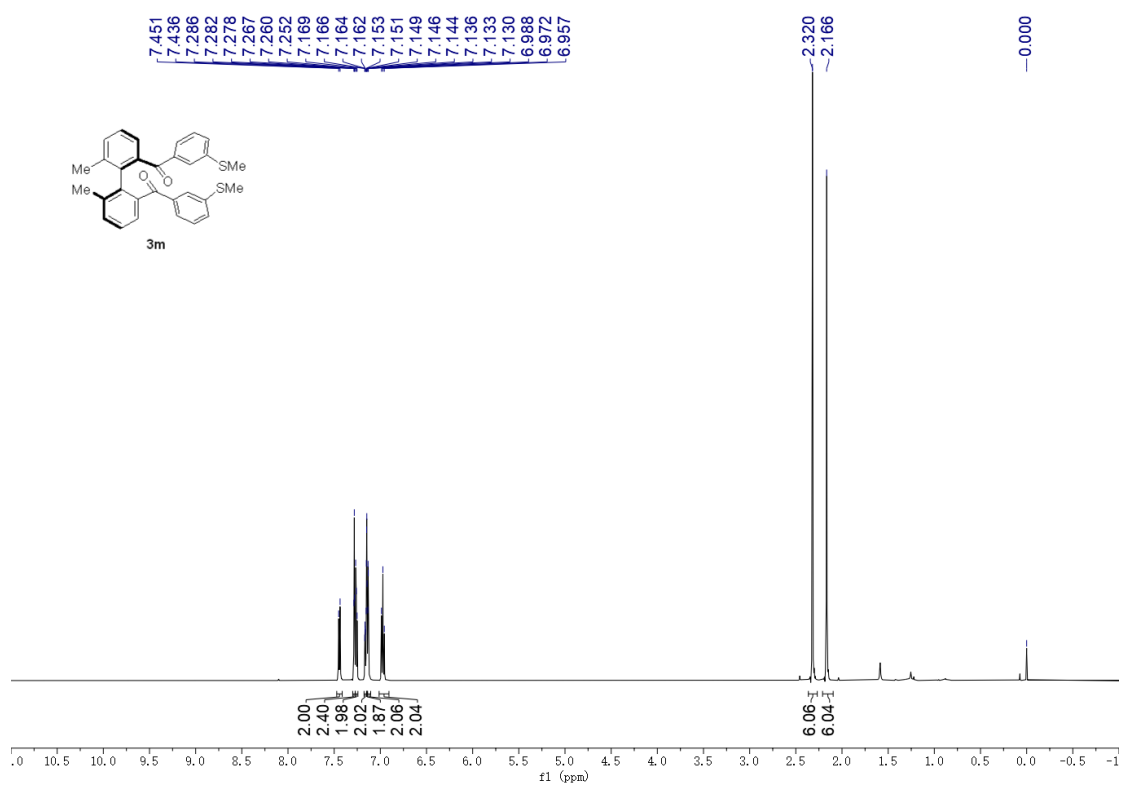

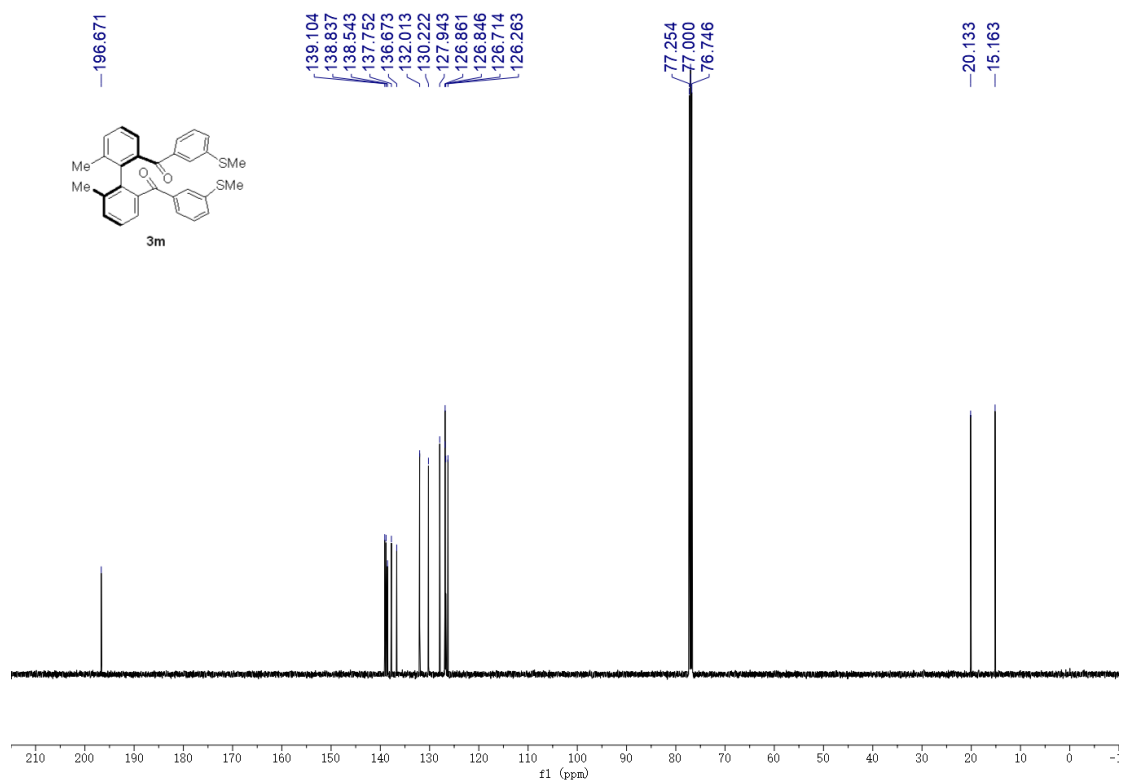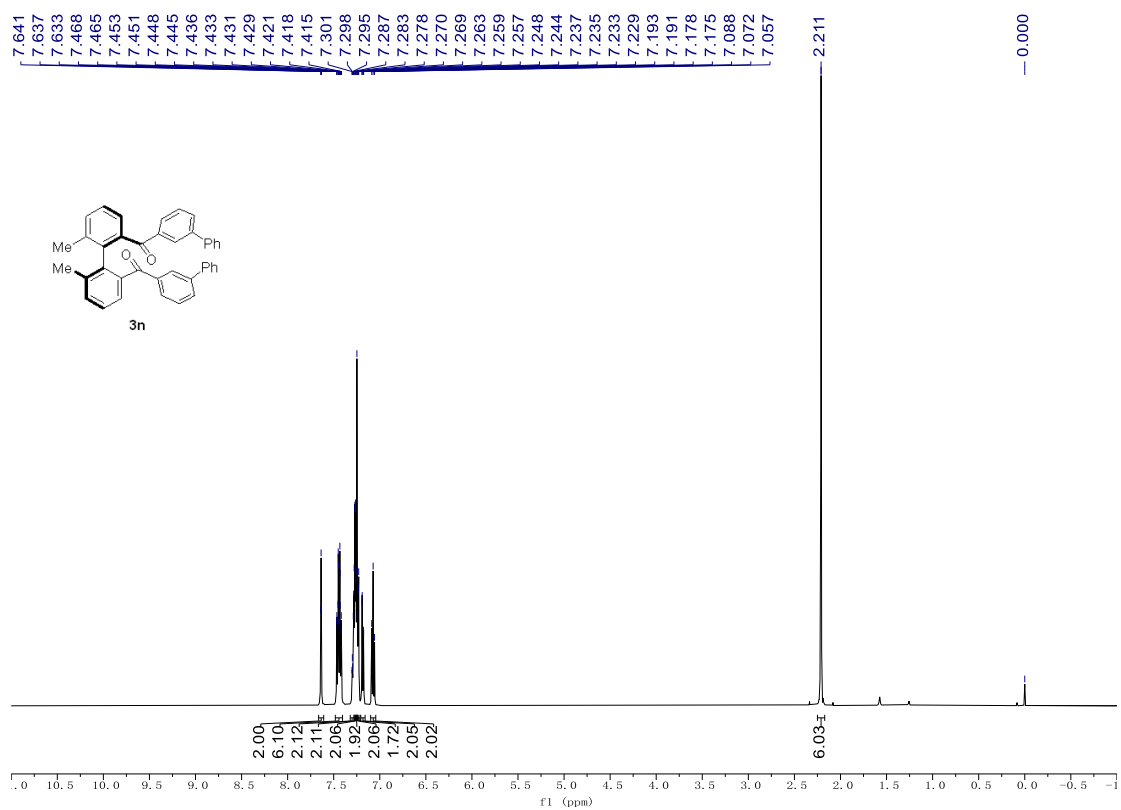

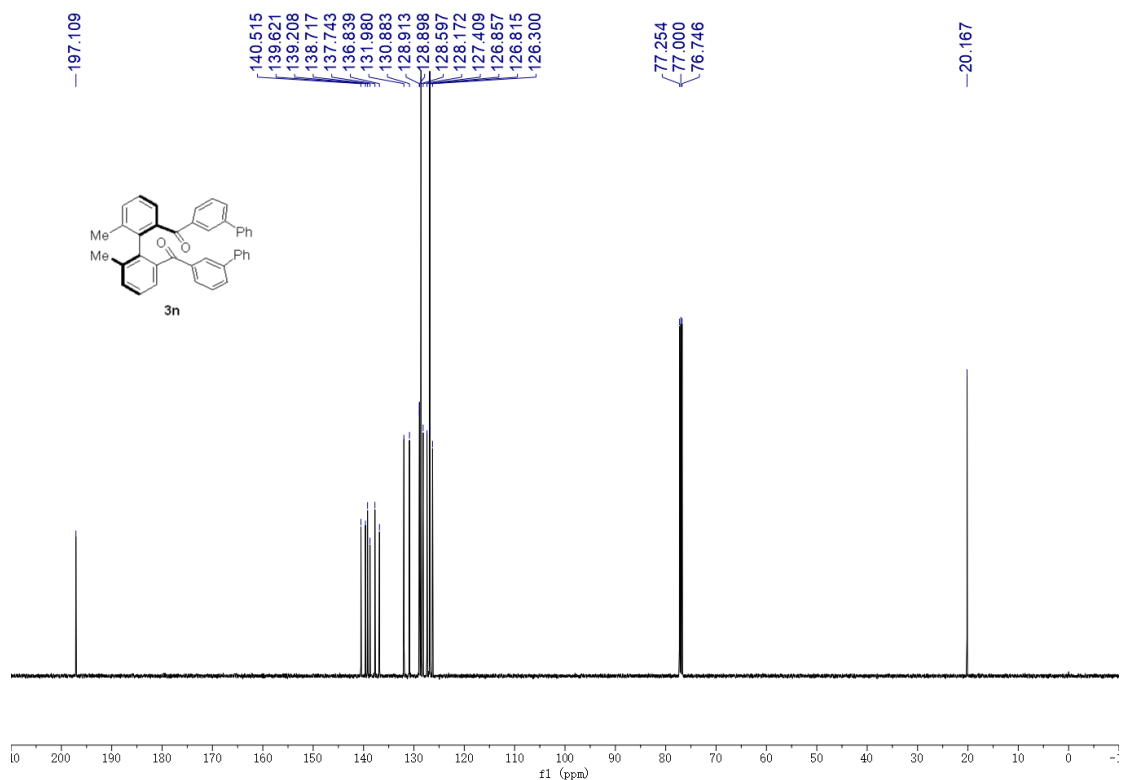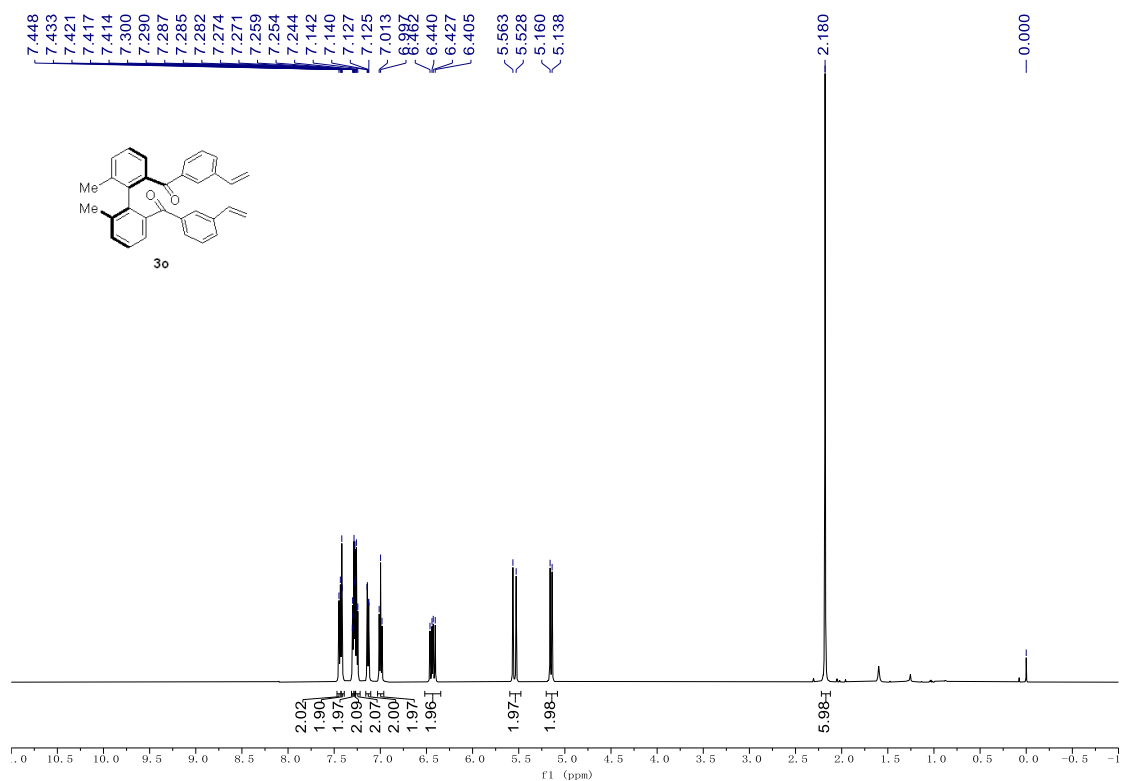

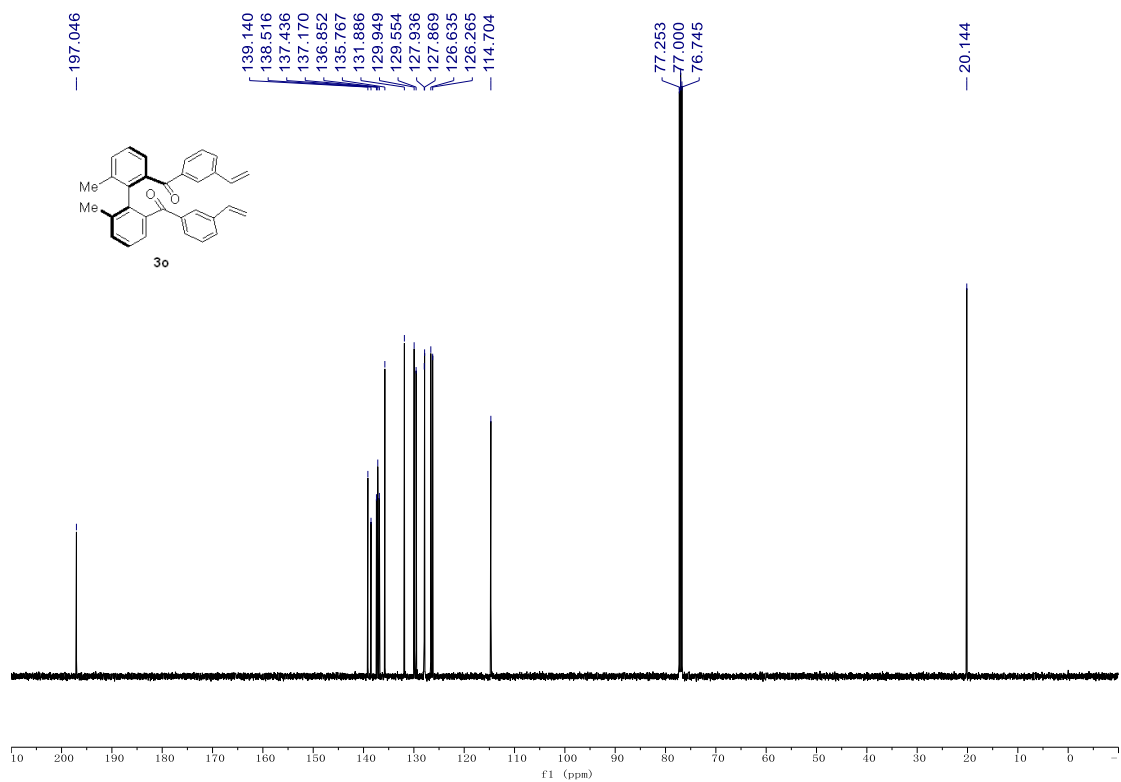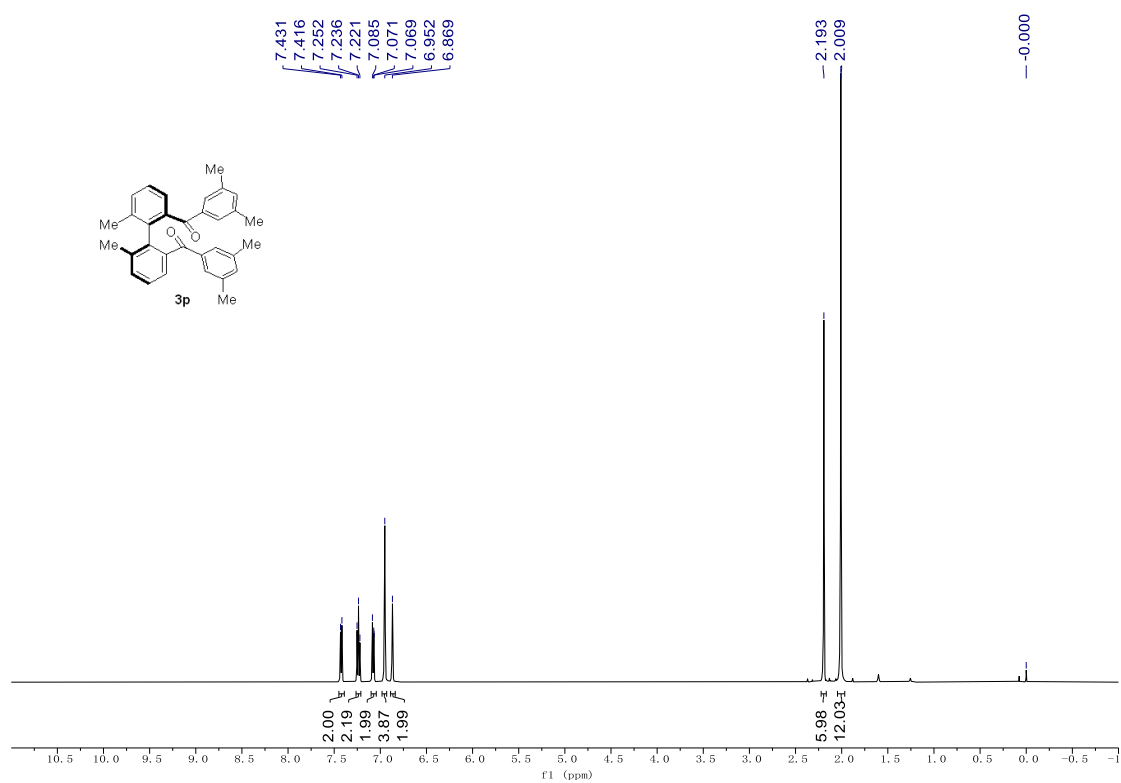

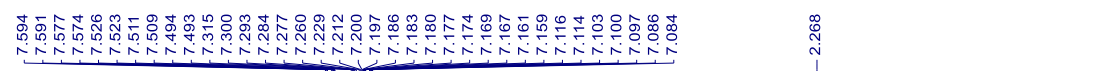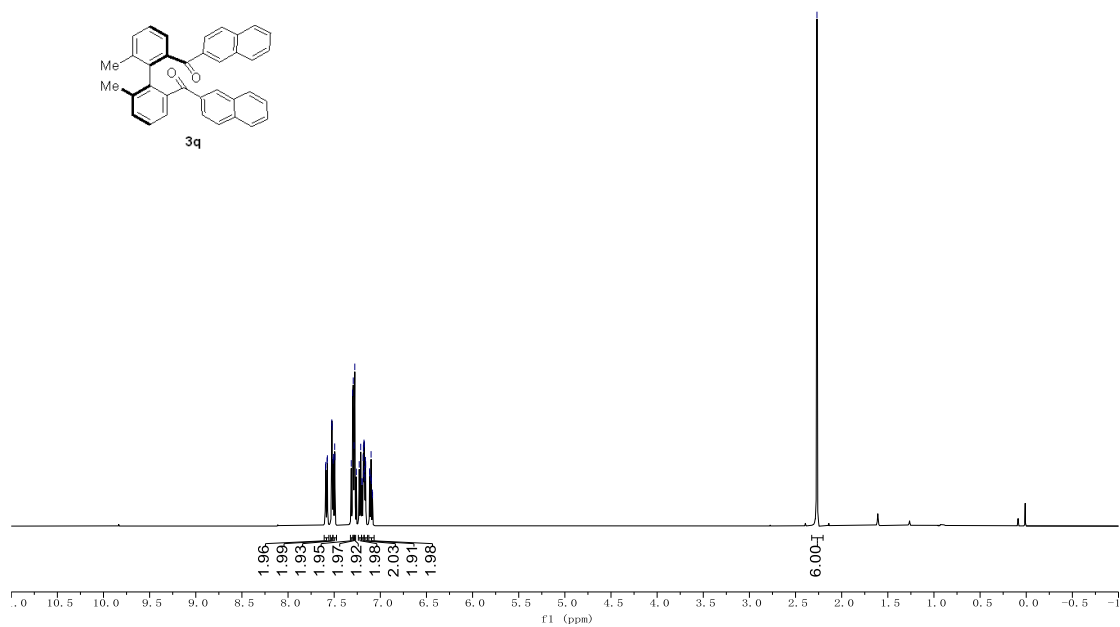



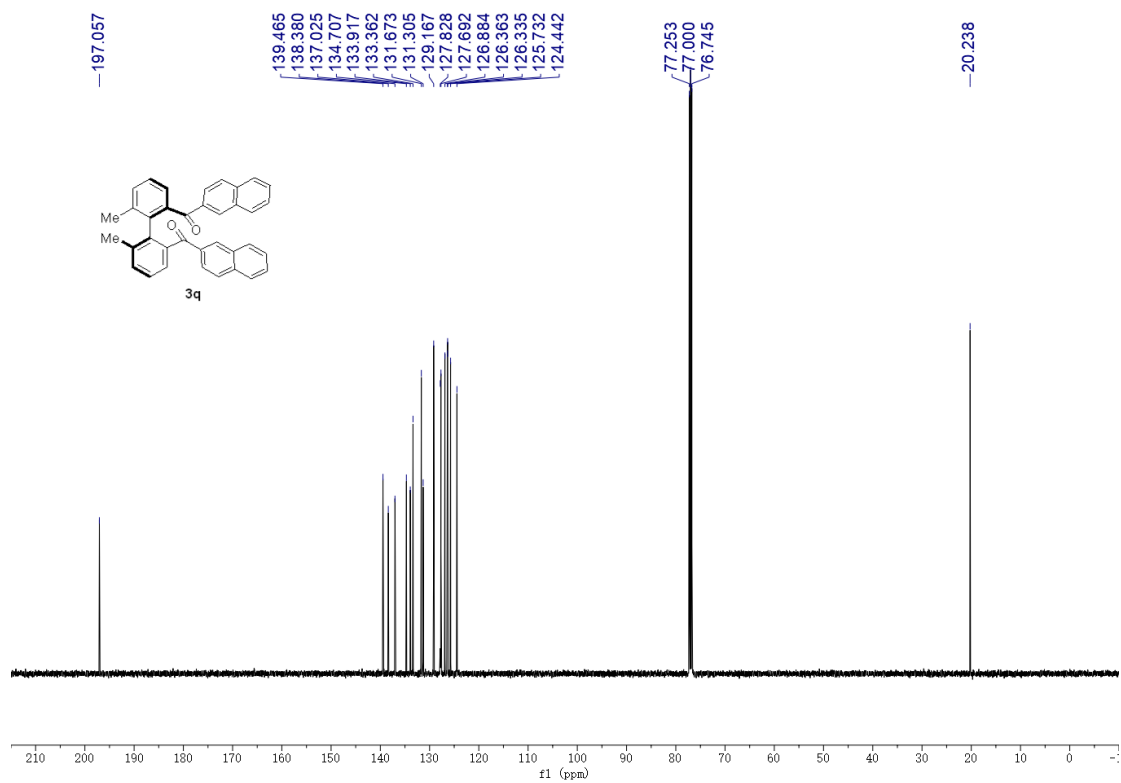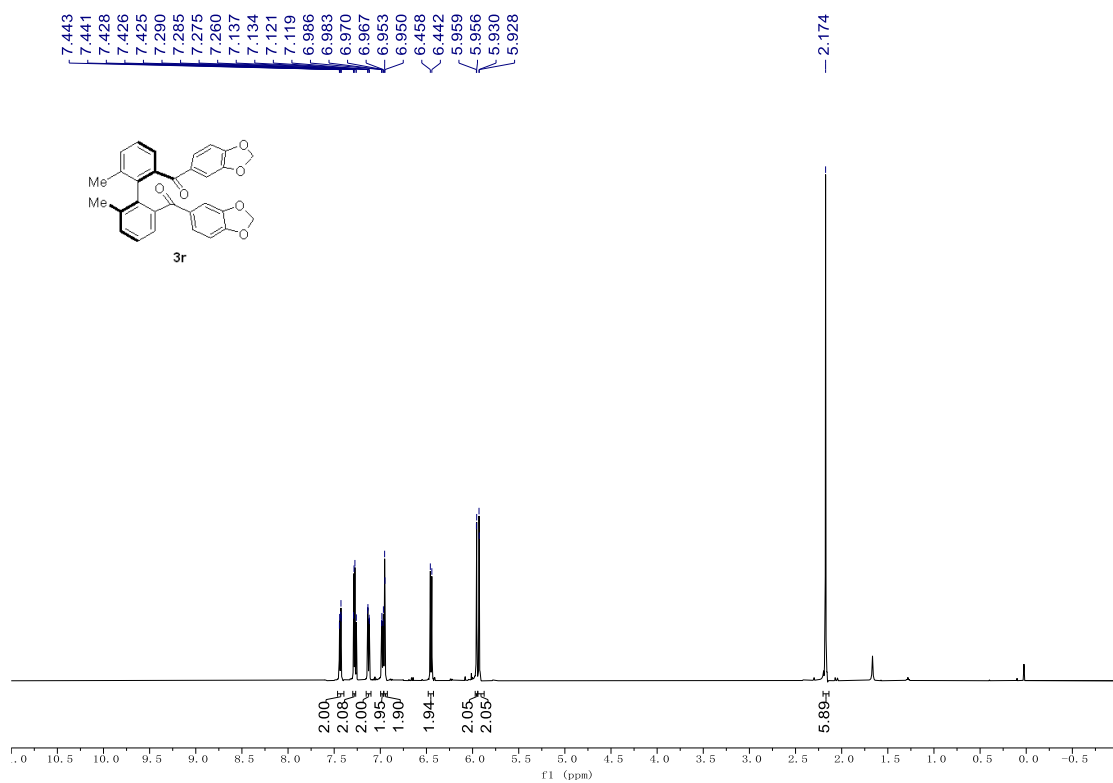

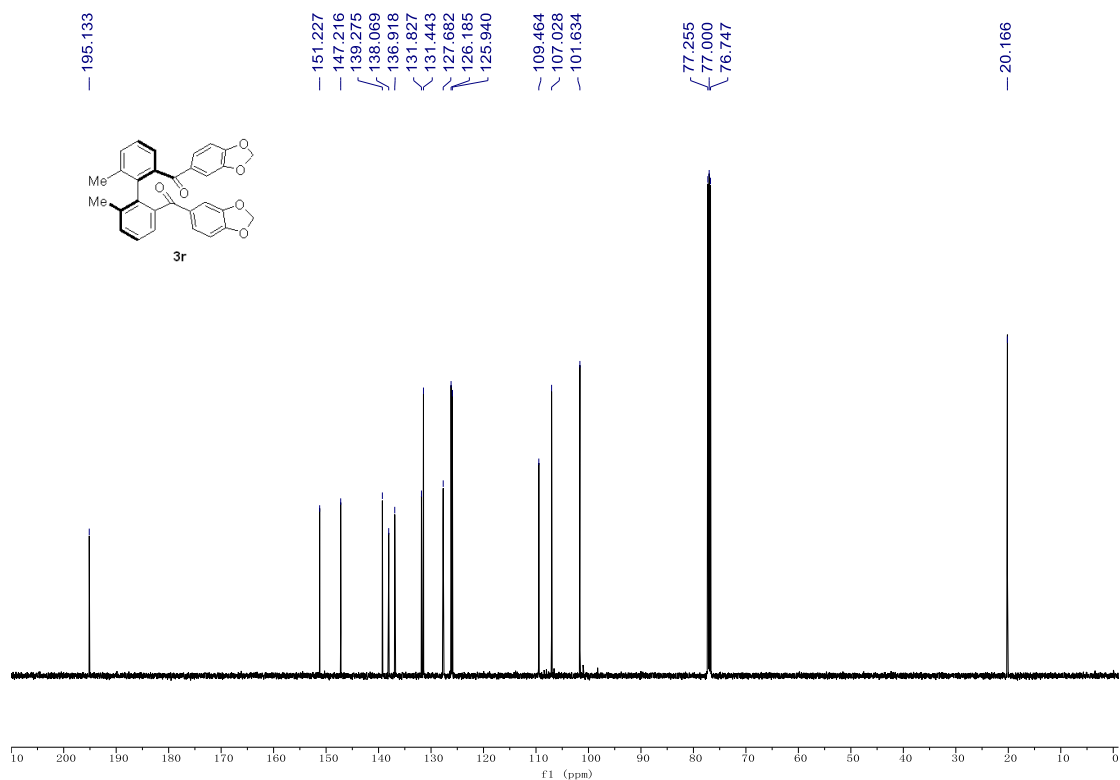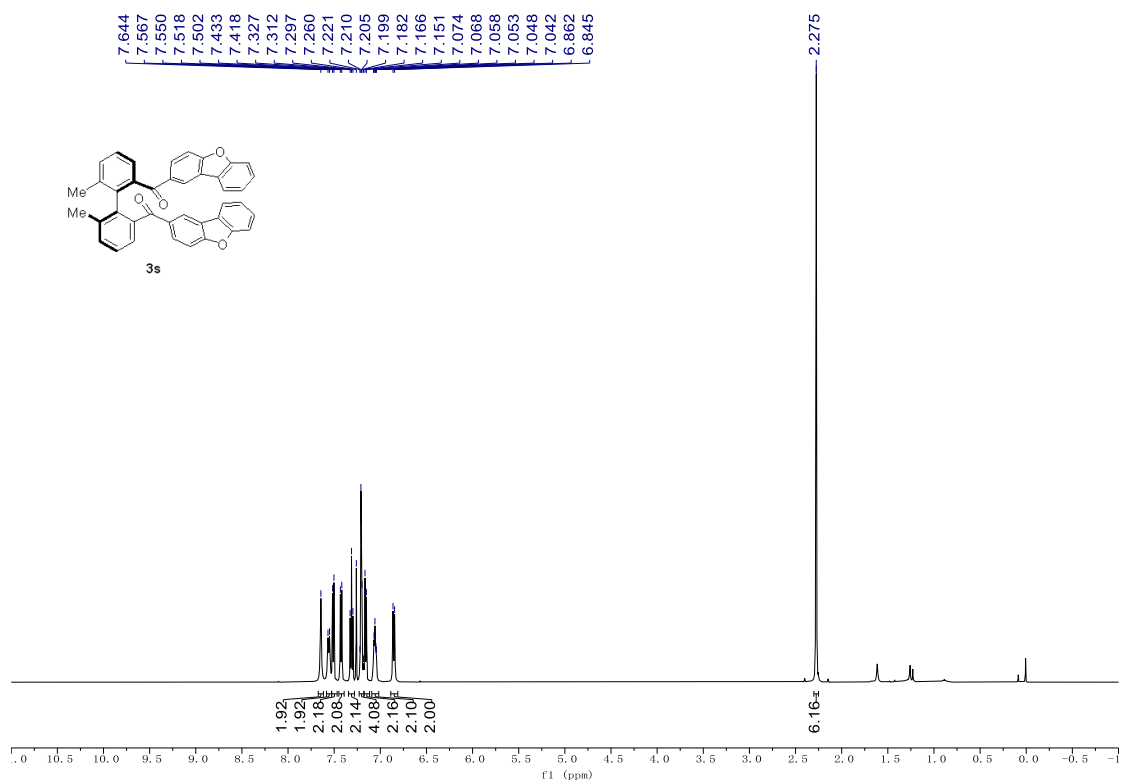

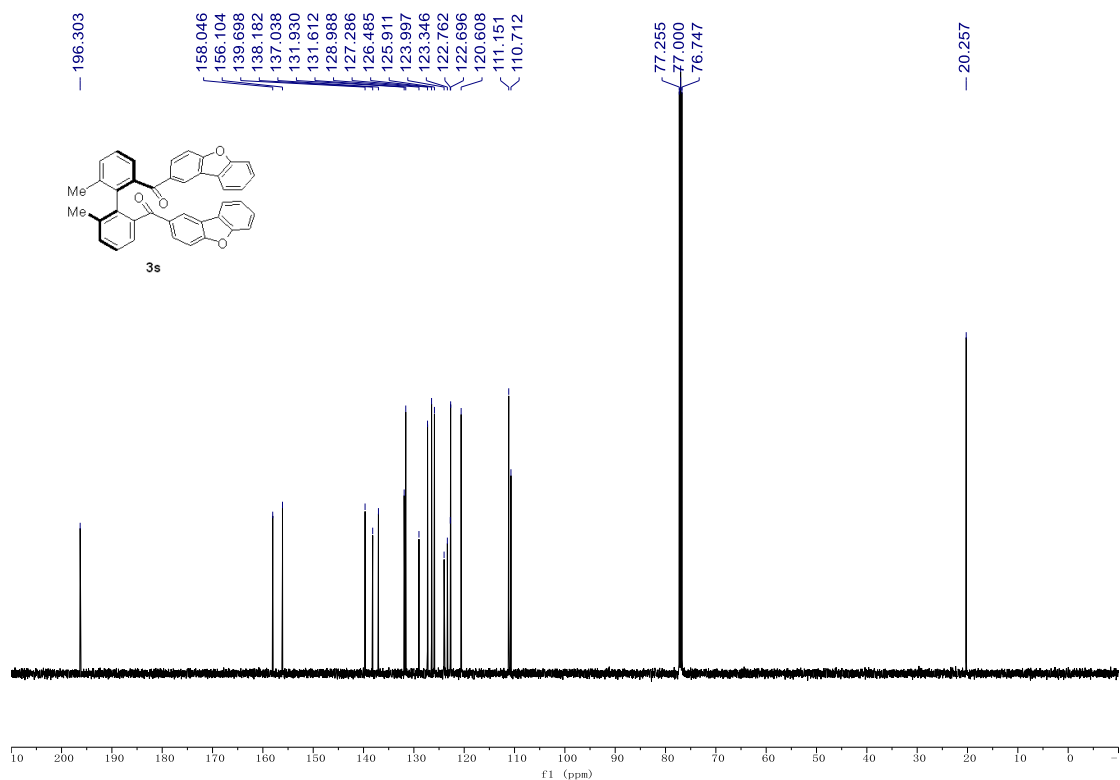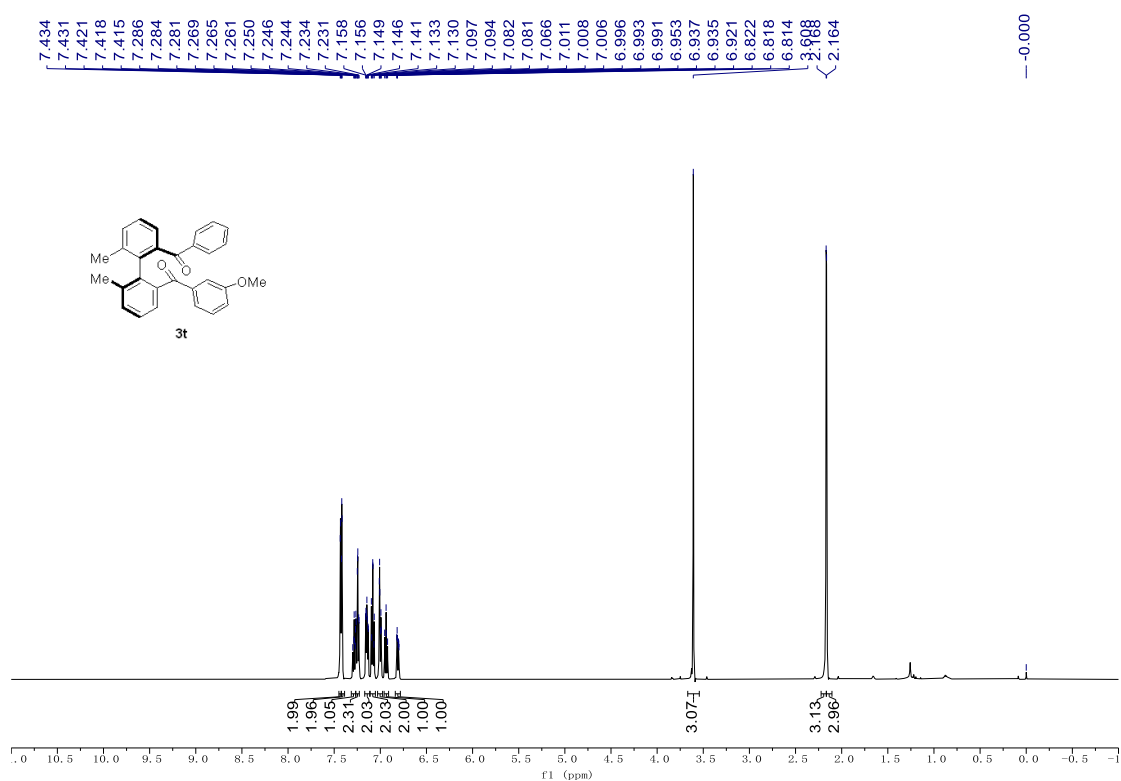

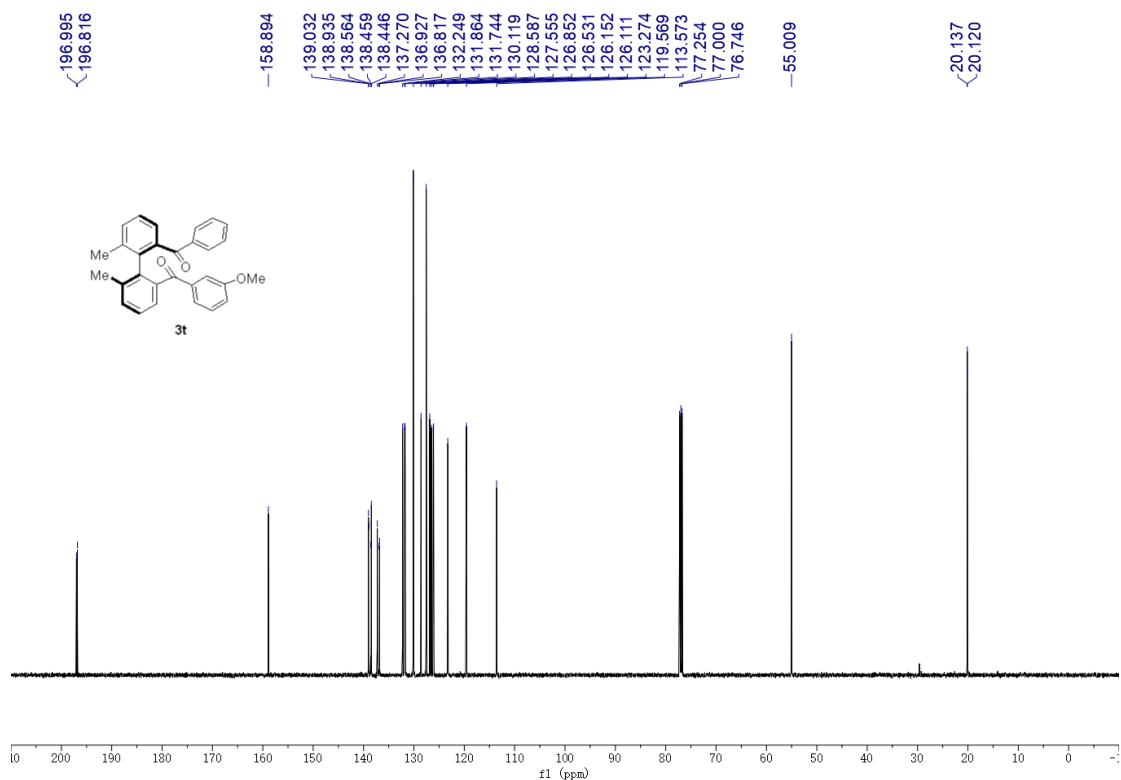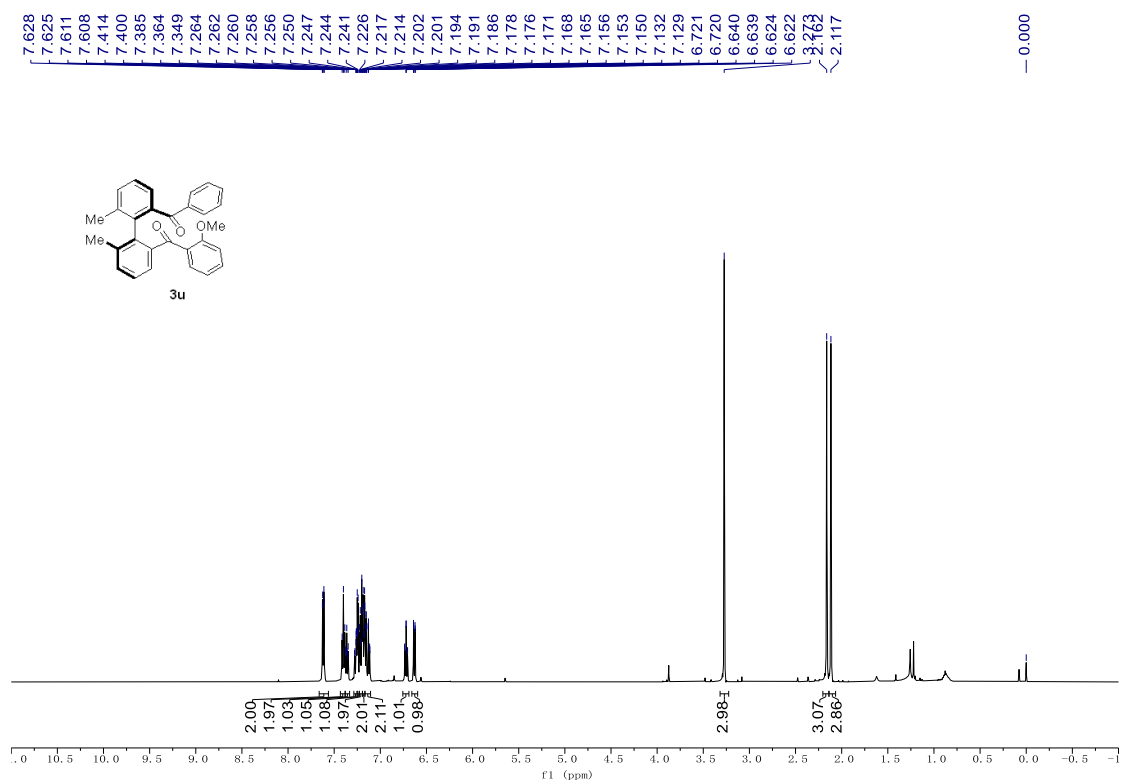

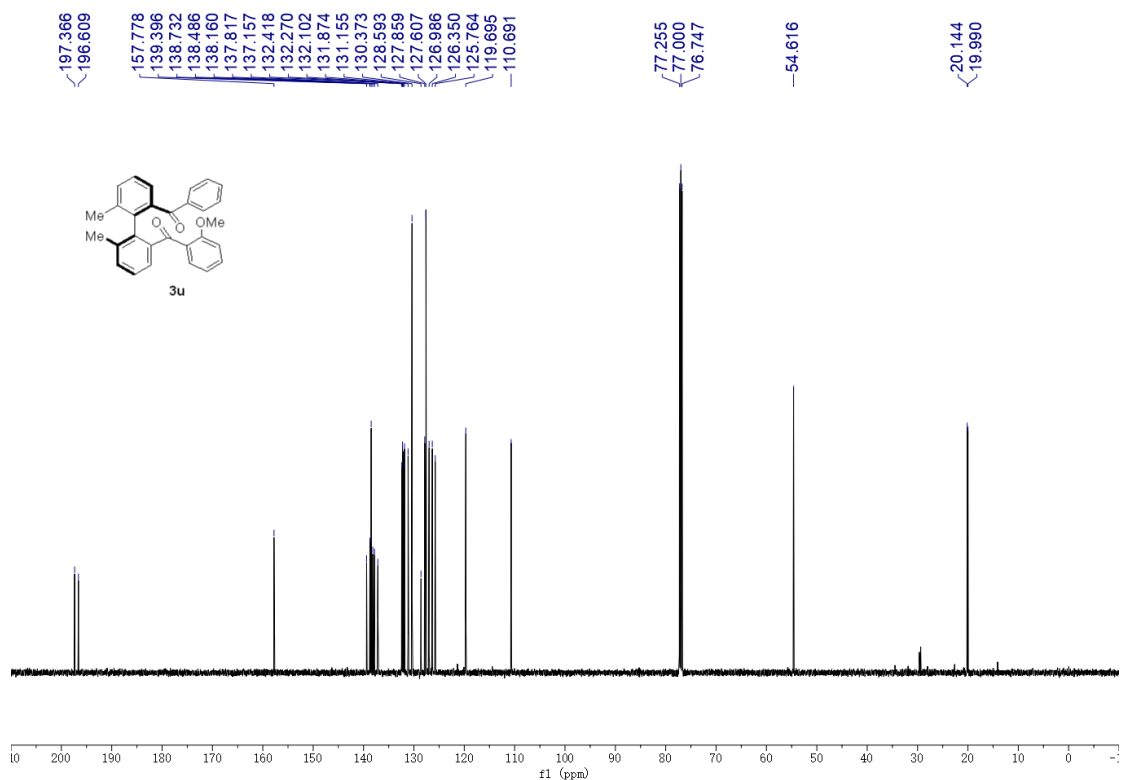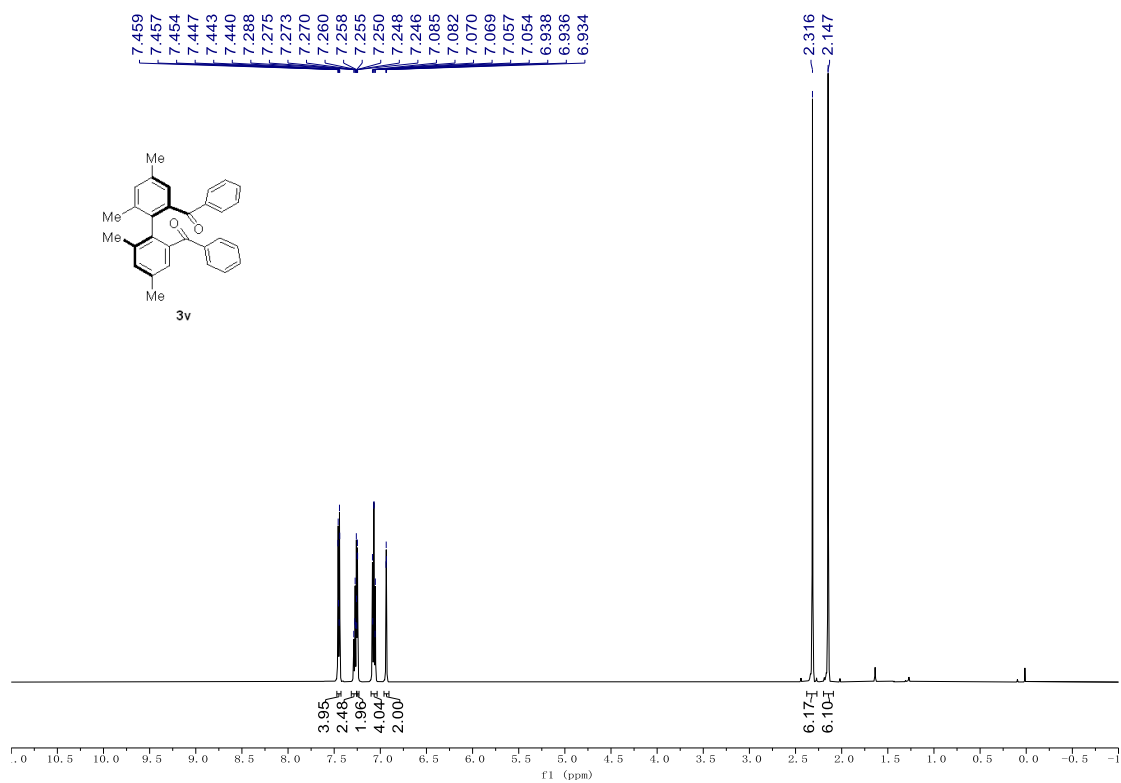

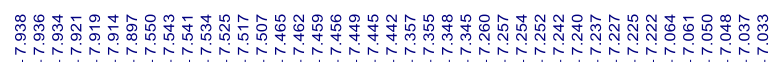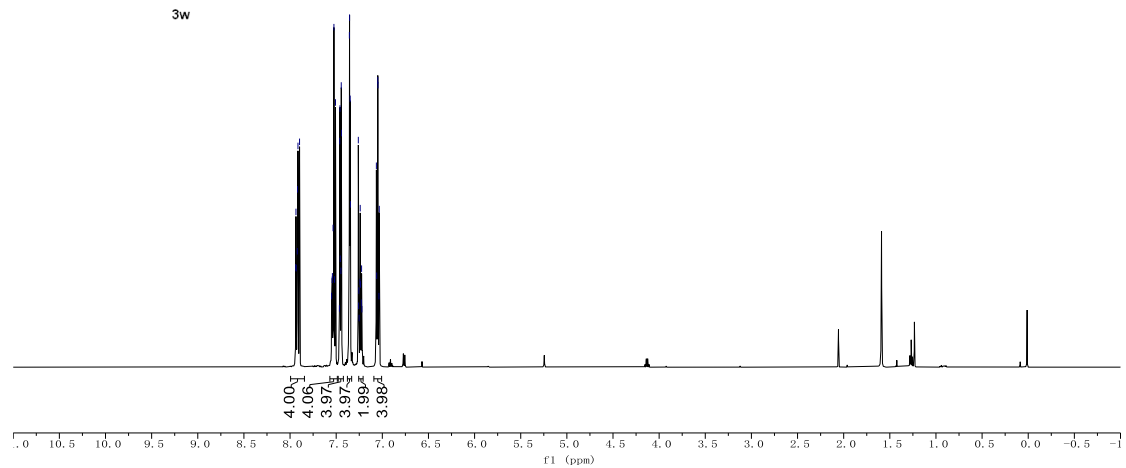

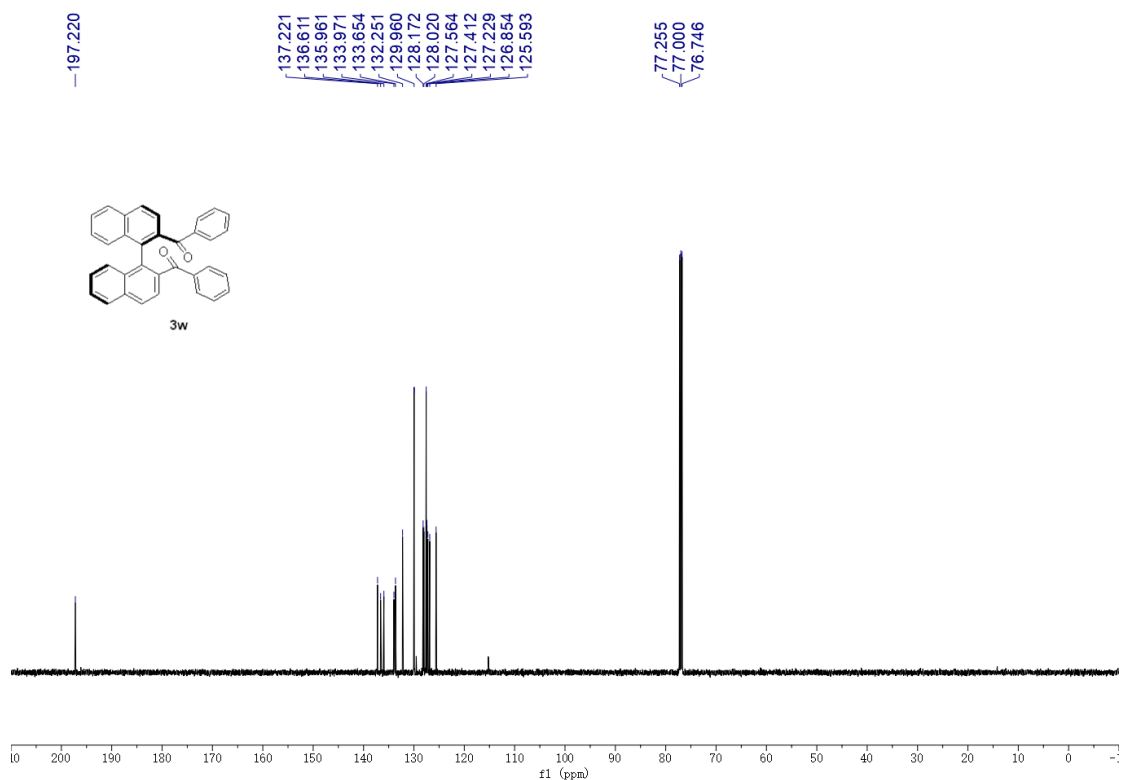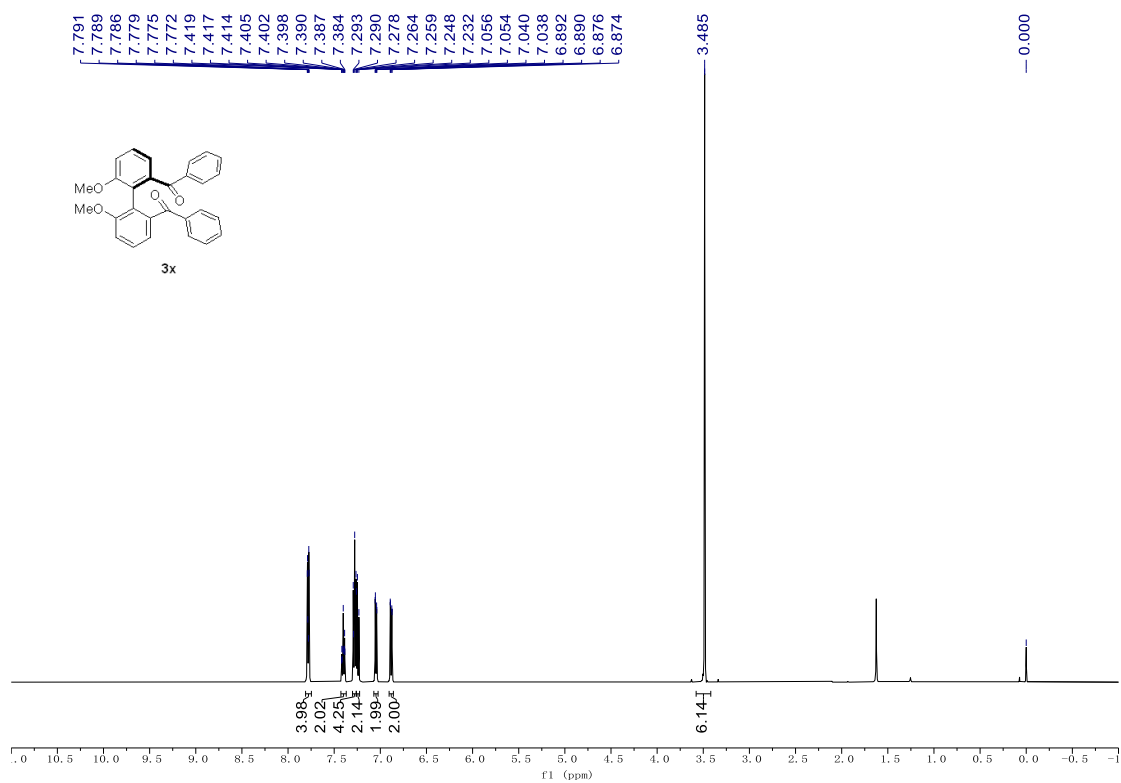

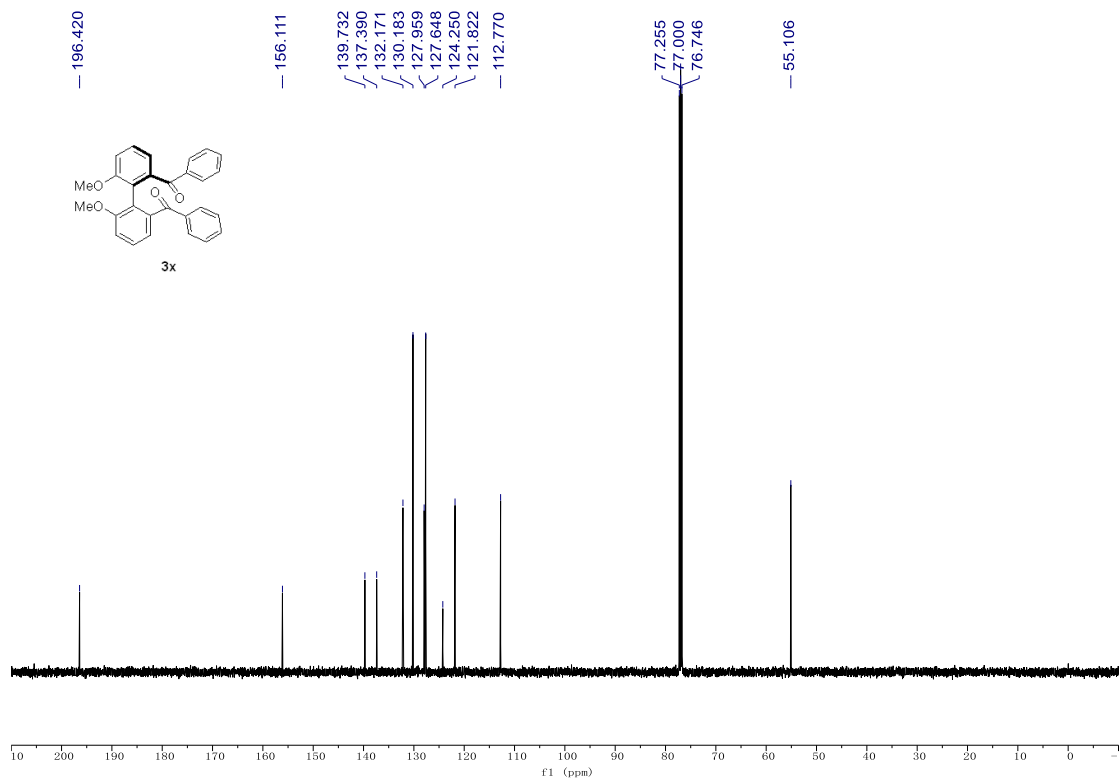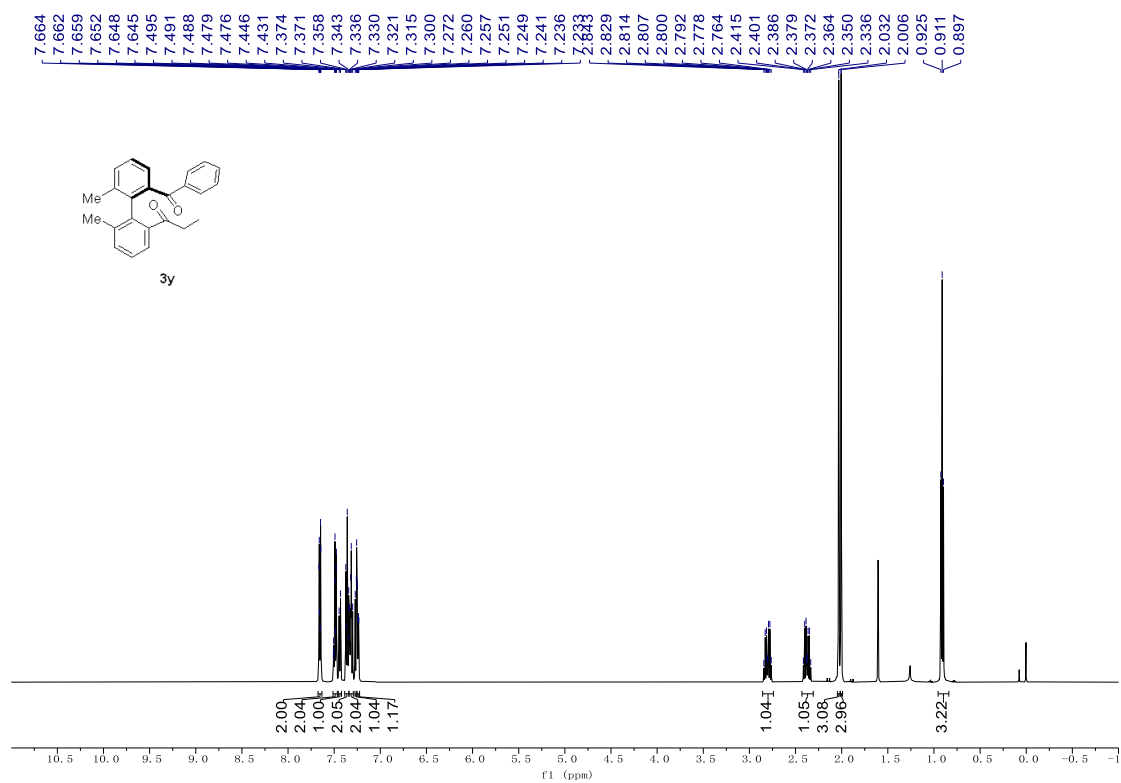



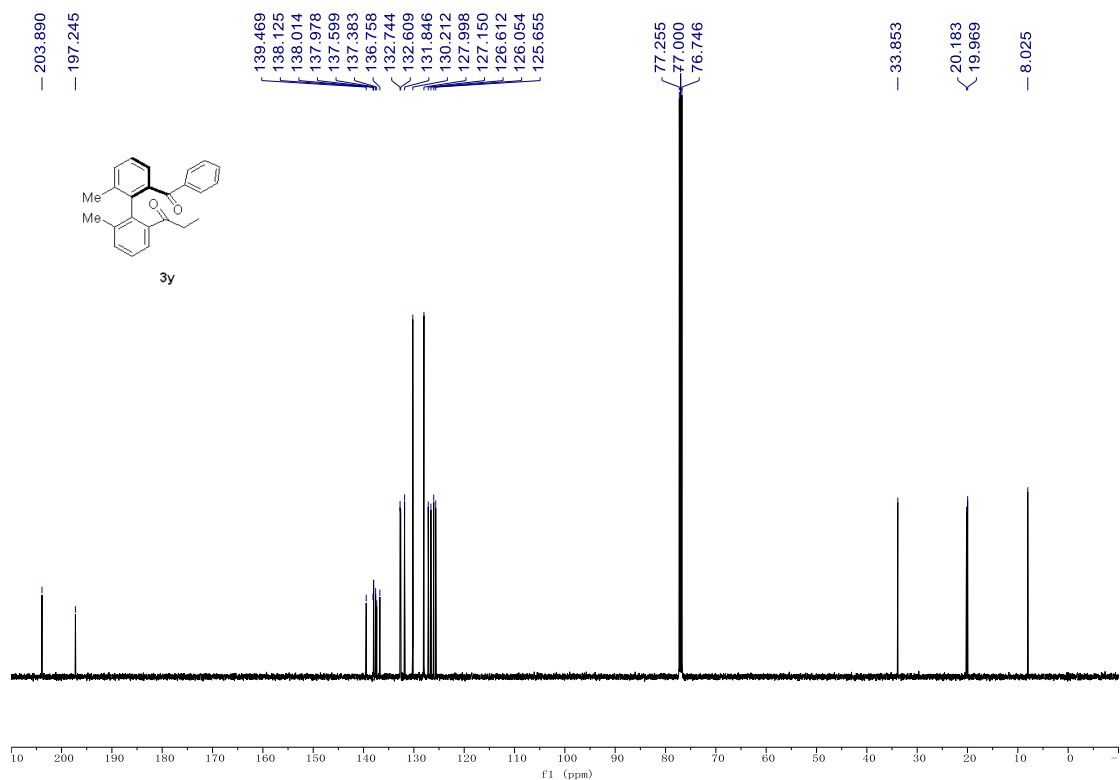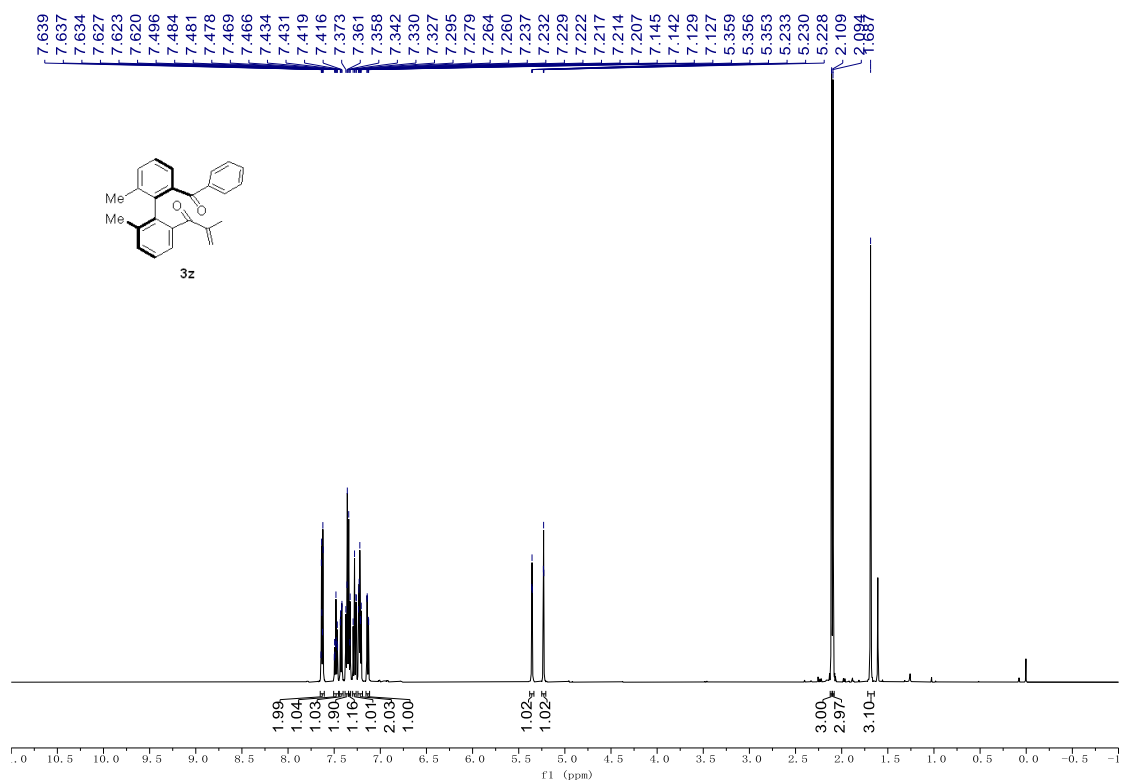

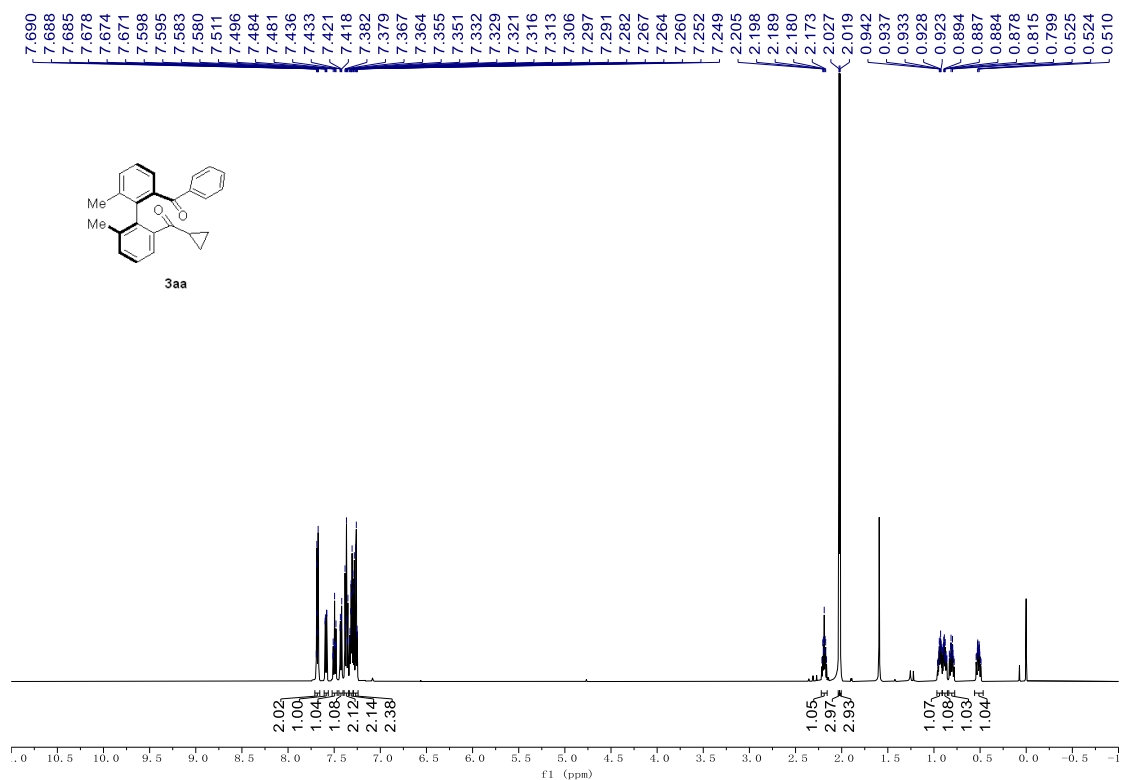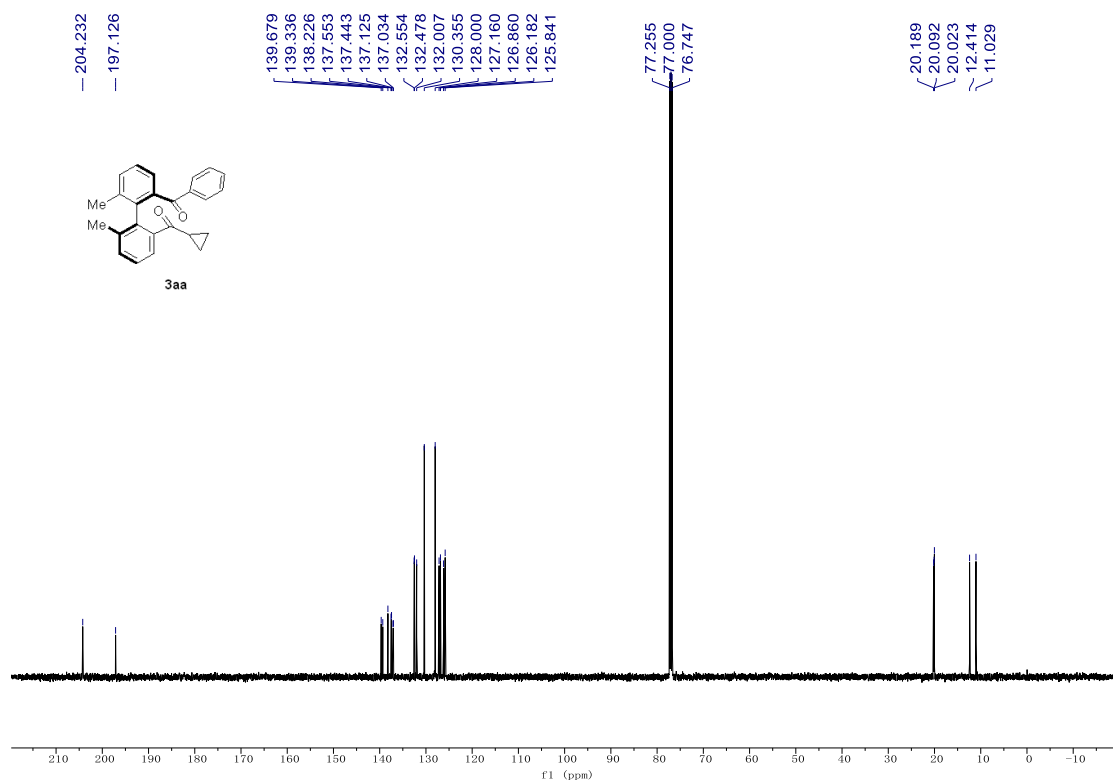

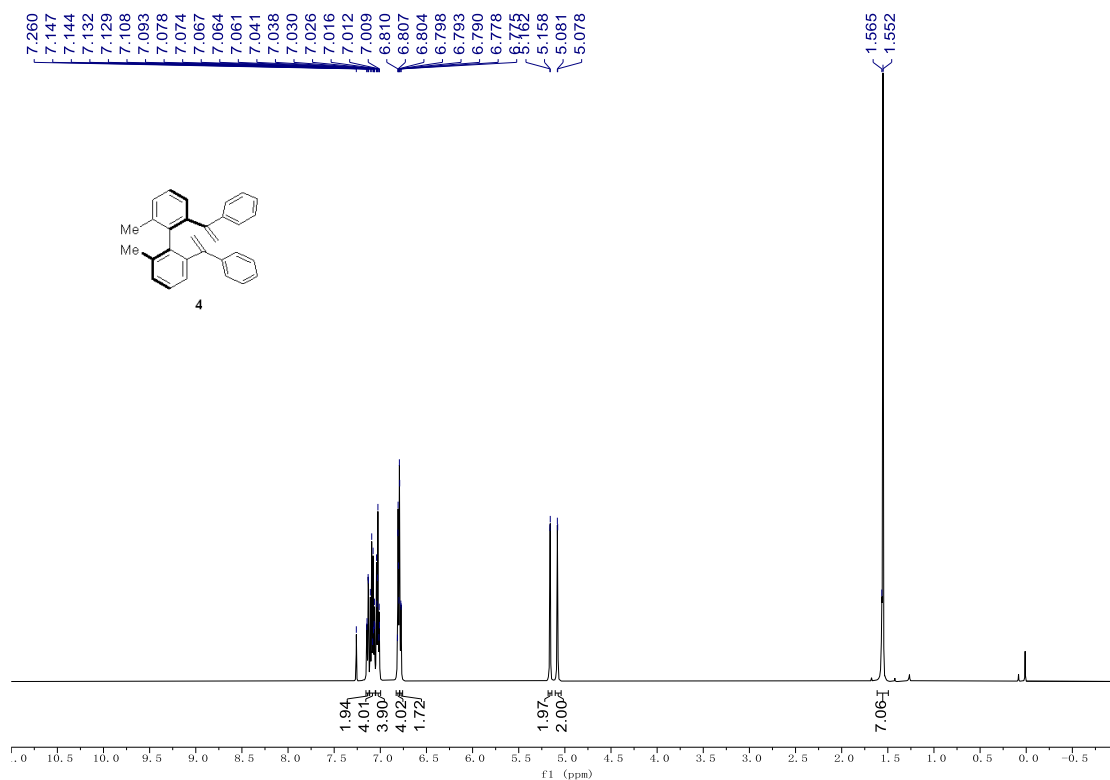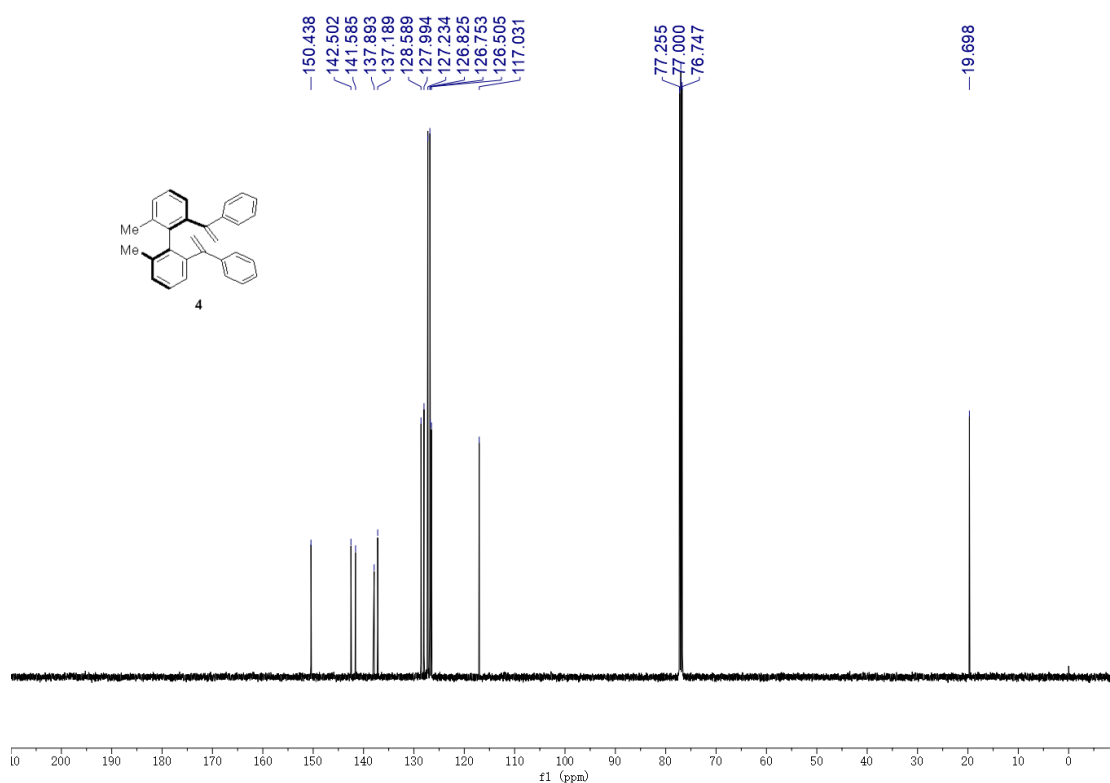

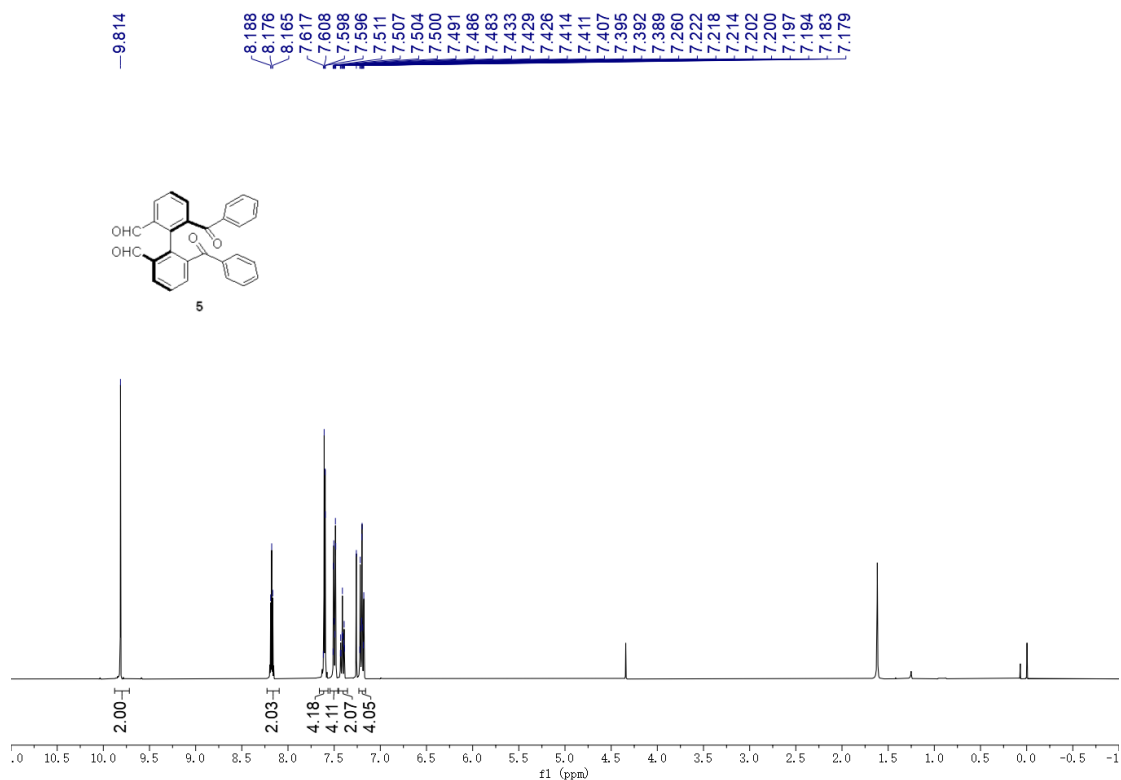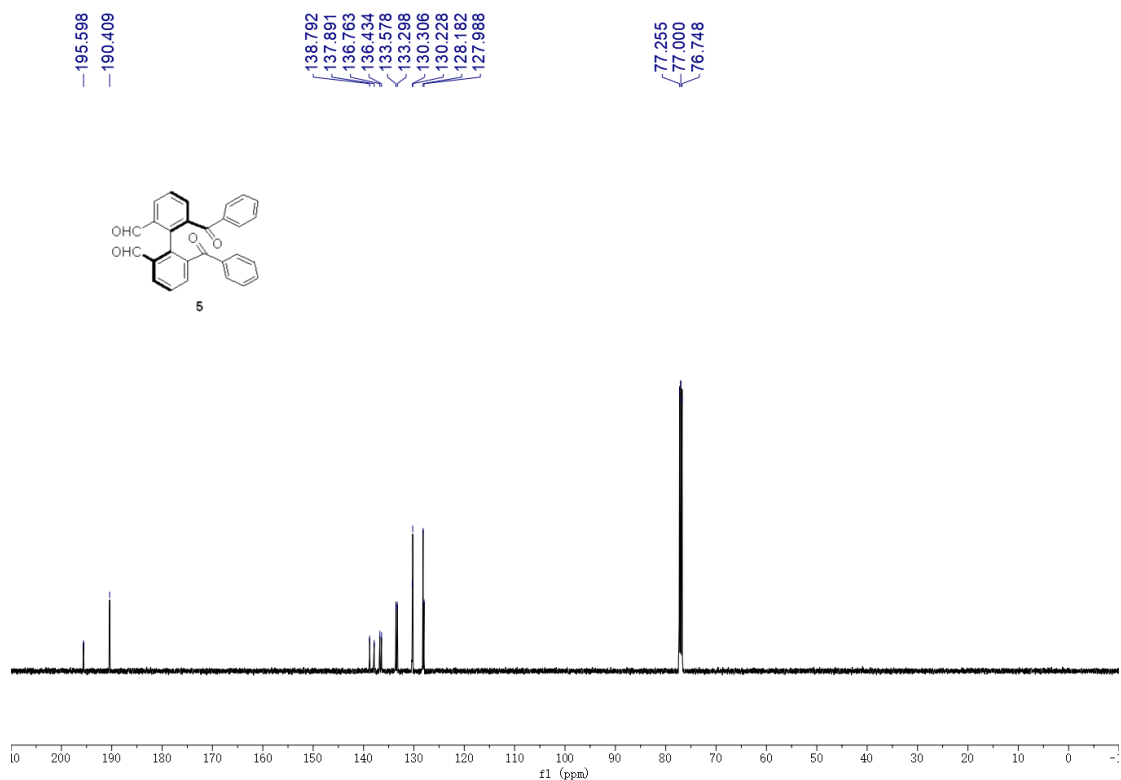

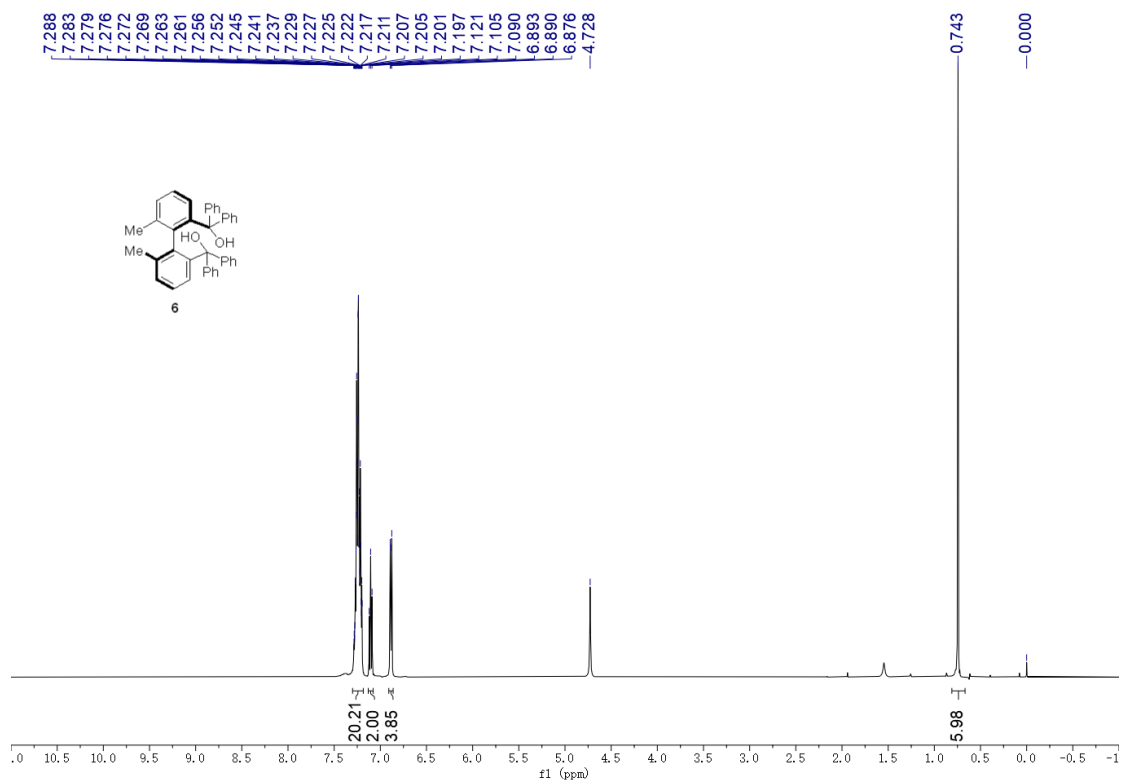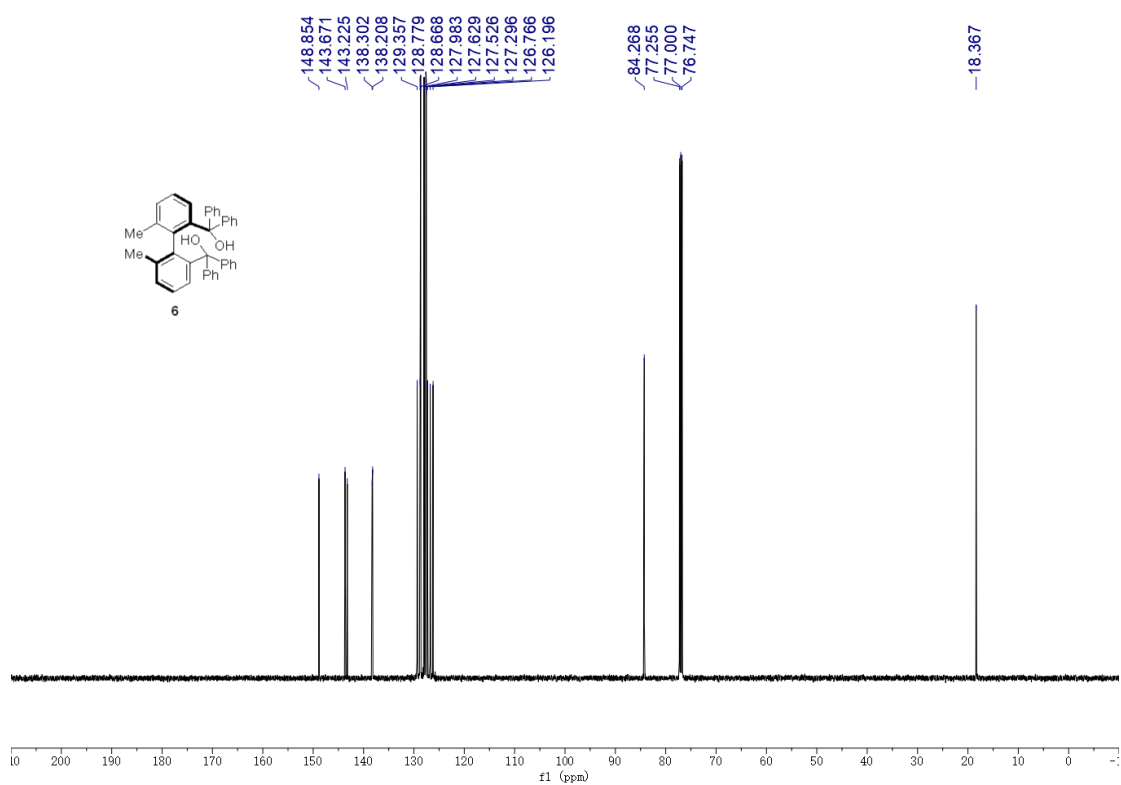

## Copies of HPLC Traces

### <Chromatogram>

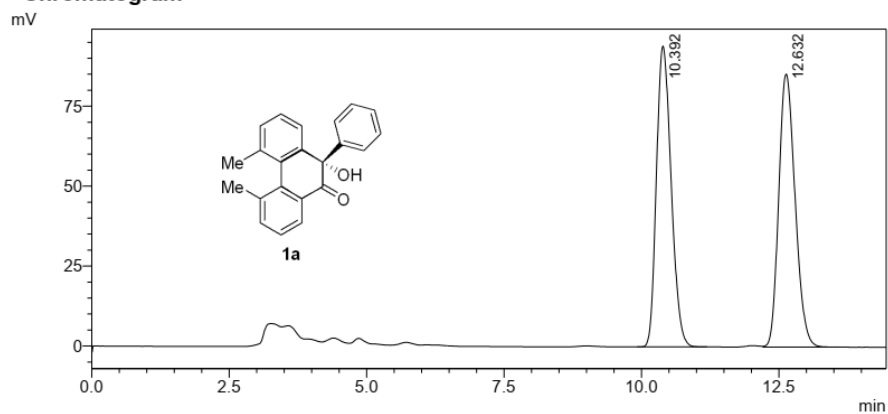

### <Peak Table>

Detector A Channel 1 254nm

| Peak# | Ret. Time | Area    | Height | Conc.  | Unit | Mark | Name |
|-------|-----------|---------|--------|--------|------|------|------|
| 1     | 10.392    | 1754130 | 94046  | 49.825 |      |      |      |
| 2     | 12.632    | 1766461 | 85386  | 50.175 |      |      |      |
| Total |           | 3520591 | 179432 |        |      |      |      |

### <Chromatogram>

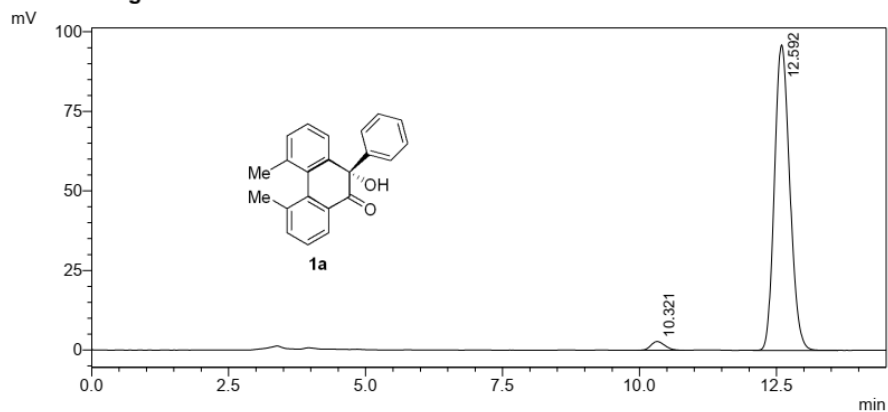

### <Peak Table>

Detector A Channel 1 254nm

| Peak# | Ret. Time | Area    | Height | Conc.  | Unit | Mark | Name |
|-------|-----------|---------|--------|--------|------|------|------|
| 1     | 10.321    | 48969   | 2756   | 2.549  |      |      |      |
| 2     | 12.592    | 1872157 | 95967  | 97.451 |      |      |      |
| Total |           | 1921126 | 98724  |        |      |      |      |

# <Chromatogram>

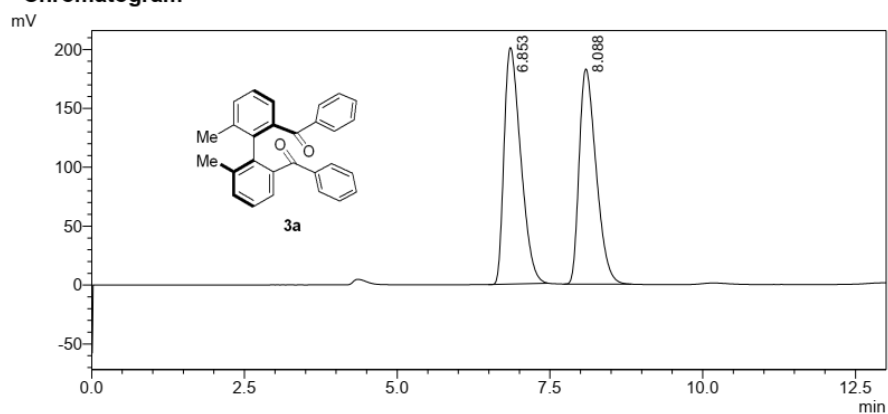

## <Peak Table>

Detector A Channel 1 254nm

| Peak# | Ret. Time | Area    | Height | Conc.  | Unit | Mark | Name |
|-------|-----------|---------|--------|--------|------|------|------|
| 1     | 6.853     | 3803104 | 200752 | 51.830 |      |      |      |
| 2     | 8.088     | 3534565 | 182606 | 48.170 |      |      |      |
| Total |           | 7337669 | 383358 |        |      |      |      |

# <Chromatogram>

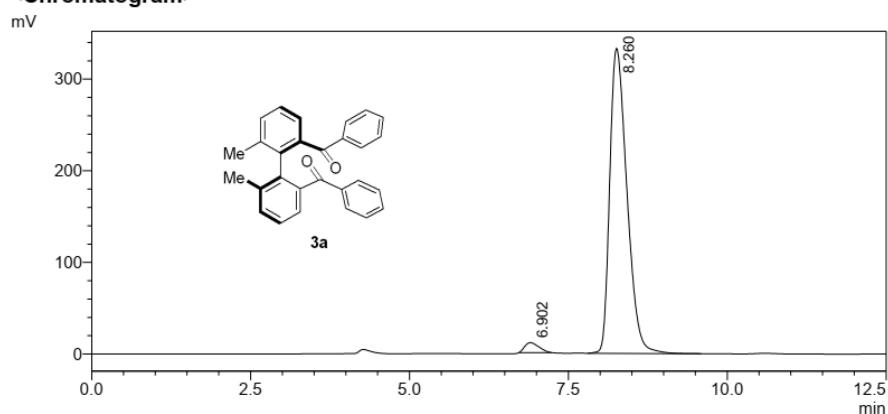

## <Peak Table>

Detector A Channel 1 254nm

| Peak# | Ret. Time | Area    | Height | Conc.  | Unit | Mark | Name |
|-------|-----------|---------|--------|--------|------|------|------|
| 1     | 6.902     | 167066  | 10815  | 2.601  |      |      |      |
| 2     | 8.260     | 6256364 | 332719 | 97.399 |      |      |      |
| Total |           | 6423430 | 343534 |        |      |      |      |

# <Chromatogram>

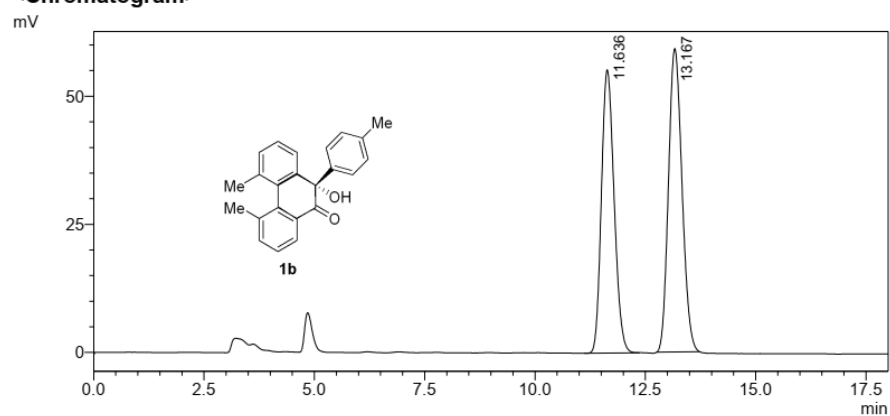

## <Peak Table>

Detector A Channel 1 254nm

| Peak# | Ret. Time | Area    | Height | Conc.  | Unit | Mark | Name |
|-------|-----------|---------|--------|--------|------|------|------|
| 1     | 11.636    | 1105765 | 55245  | 46.703 |      |      |      |
| 2     | 13.167    | 1261906 | 59198  | 53.297 |      |      |      |
| Total |           | 2367671 | 114442 |        |      |      |      |

# <Chromatogram>

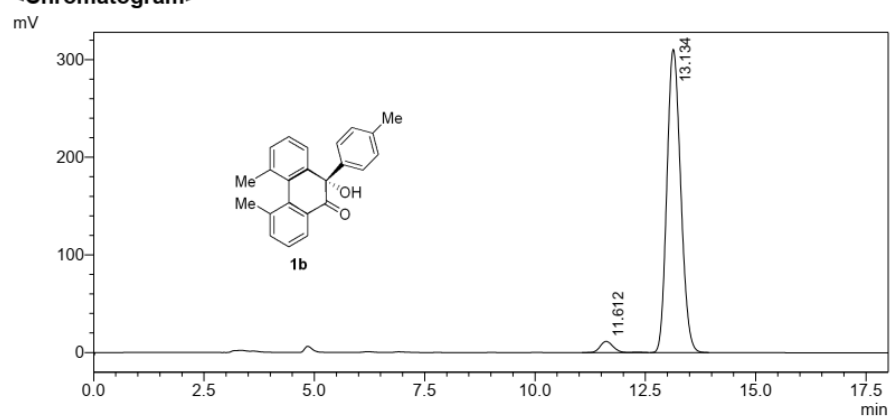

## <Peak Table>

Detector A Channel 1 254nm

| Peak# | Ret. Time | Area    | Height | Conc.  | Unit | Mark | Name |
|-------|-----------|---------|--------|--------|------|------|------|
| 1     | 11.612    | 240825  | 11496  | 3.444  |      |      |      |
| 2     | 13.134    | 6752127 | 310440 | 96.556 |      |      |      |
| Total |           | 6992953 | 321936 |        |      |      |      |



### <Chromatogram>

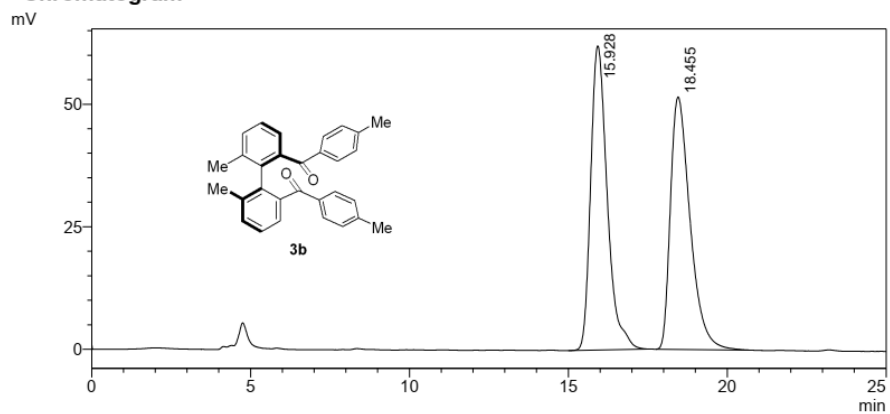

### <Peak Table>

Detector A Channel 1 254nm

| Peak# | Ret. Time | Area    | Height | Conc.  | Unit | Mark | Name |
|-------|-----------|---------|--------|--------|------|------|------|
| 1     | 15.928    | 2252486 | 62062  | 50.354 |      |      |      |
| 2     | 18.455    | 2220809 | 51504  | 49.646 |      |      |      |
| Total |           | 4473296 | 113566 |        |      |      |      |

### <Chromatogram>

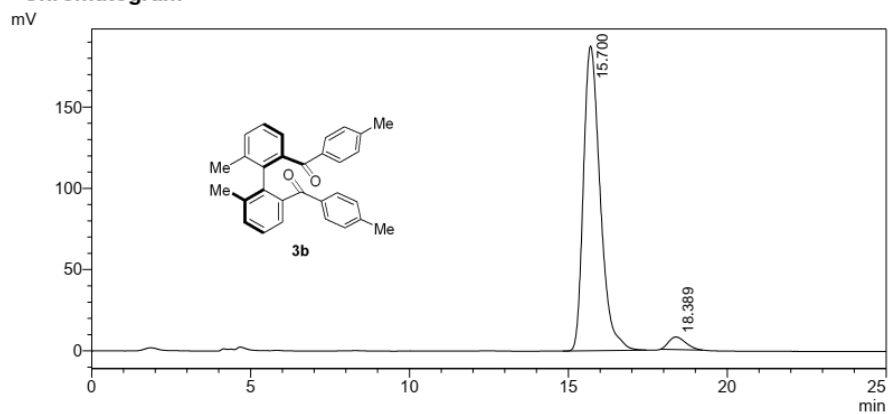

### <Peak Table>

Detector A Channel 1 254nm

| Peak# | Ret. Time | Area    | Height | Conc.  | Unit | Mark | Name |
|-------|-----------|---------|--------|--------|------|------|------|
| 1     | 15.700    | 6866008 | 187479 | 95.961 |      |      |      |
| 2     | 18.389    | 289000  | 7717   | 4.039  |      |      |      |
| Total |           | 7155008 | 195195 |        |      |      |      |

# <Chromatogram>

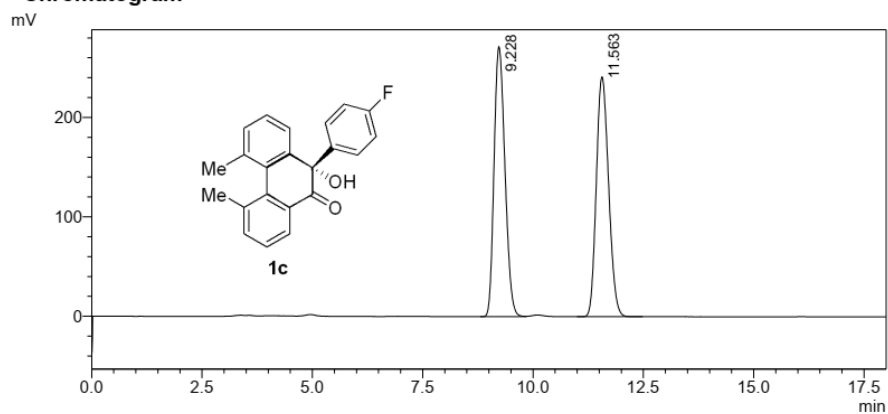

## <Peak Table>

Detector A Channel 1 254nm

| Peak# | Ret. Time | Area    | Height | Conc.  | Unit | Mark | Name |
|-------|-----------|---------|--------|--------|------|------|------|
| 1     | 9.228     | 4668822 | 271447 | 50.000 |      |      |      |
| 2     | 11.563    | 4668787 | 241110 | 50.000 |      |      |      |
| Total |           | 9337609 | 512557 |        |      |      |      |

# <Chromatogram>

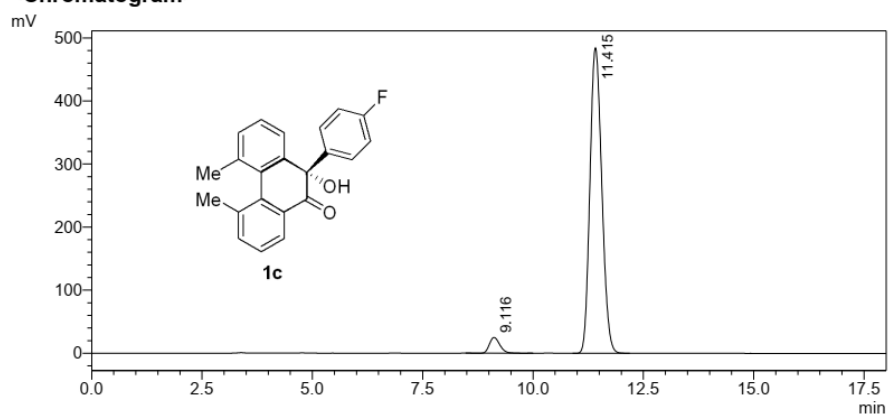

## <Peak Table>

Detector A Channel 1 254nm

| Peak# | Ret. Time | Area    | Height | Conc.  | Unit | Mark | Name |
|-------|-----------|---------|--------|--------|------|------|------|
| 1     | 9.116     | 398965  | 24760  | 4.218  |      |      |      |
| 2     | 11.415    | 9059023 | 484174 | 95.782 |      |      |      |
| Total |           | 9457988 | 508934 |        |      |      |      |

# <Chromatogram>

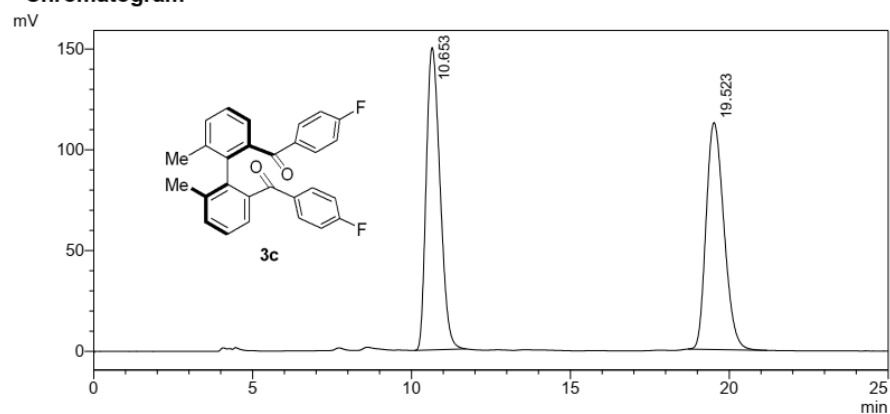

## <Peak Table>

Detector A Channel 1 254nm

| Peak# | Ret. Time | Area    | Height | Conc.  | Unit | Mark | Name |
|-------|-----------|---------|--------|--------|------|------|------|
| 1     | 10.653    | 4509207 | 149993 | 50.649 |      |      |      |
| 2     | 19.523    | 4393664 | 112539 | 49.351 |      |      |      |
| Total |           | 8902871 | 262533 |        |      |      |      |

# <Chromatogram>

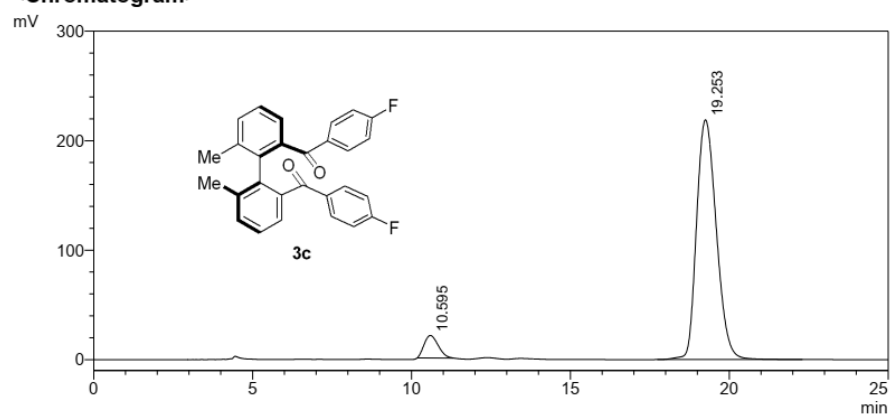

## <Peak Table>

Detector A Channel 1 254nm

| Peak# | Ret. Time | Area     | Height | Conc.  | Unit | Mark | Name |
|-------|-----------|----------|--------|--------|------|------|------|
| 1     | 10.595    | 629564   | 20524  | 6.227  |      |      |      |
| 2     | 19.253    | 9480863  | 219017 | 93.773 |      |      |      |
| Total |           | 10110427 | 239541 |        |      |      |      |

# <Chromatogram>

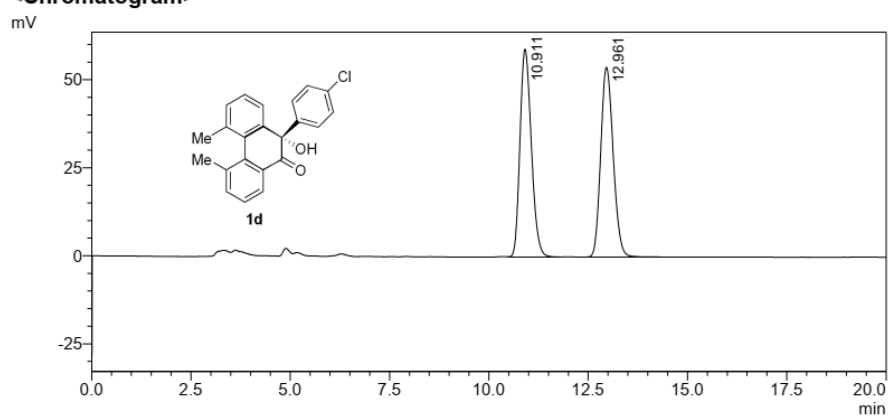

## <Peak Table>

Detector A Channel 1 254nm

| Peak# | Ret. Time | Area    | Height | Conc.  | Unit | Mark | Name |
|-------|-----------|---------|--------|--------|------|------|------|
| 1     | 10.911    | 1172430 | 59004  | 49.886 |      |      |      |
| 2     | 12.961    | 1177766 | 53905  | 50.114 |      |      |      |
| Total |           | 2350196 | 112909 |        |      |      |      |

# <Chromatogram>

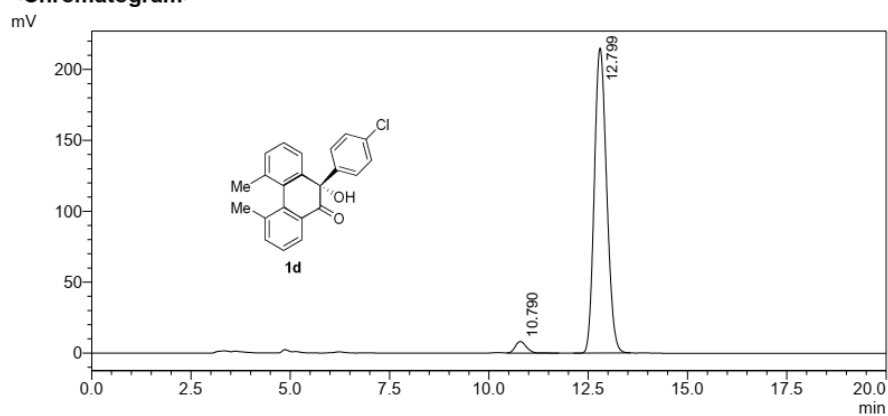

## <Peak Table>

Detector A Channel 1 254nm

| Peak# | Ret. Time | Area    | Height | Conc.  | Unit | Mark | Name |
|-------|-----------|---------|--------|--------|------|------|------|
| 1     | 10.790    | 162224  | 8227   | 3.376  |      |      |      |
| 2     | 12.799    | 4642815 | 215025 | 96.624 |      |      |      |
| Total |           | 4805039 | 223252 |        |      |      |      |

# <Chromatogram>

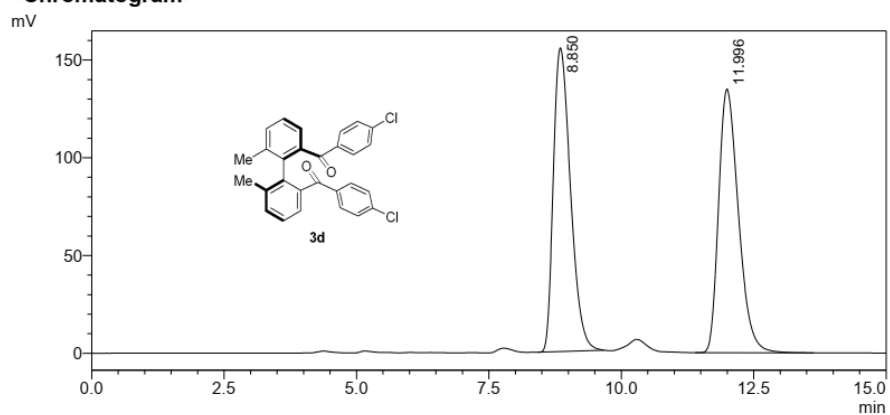

## <Peak Table>

Detector A Channel 1 254nm

| Peak# | Ret. Time | Area    | Height | Conc.  | Unit | Mark | Name |
|-------|-----------|---------|--------|--------|------|------|------|
| 1     | 8.850     | 3493031 | 155297 | 49.861 |      |      |      |
| 2     | 11.996    | 3512483 | 134849 | 50.139 |      |      |      |
| Total |           | 7005514 | 290146 |        |      |      |      |

# <Chromatogram>

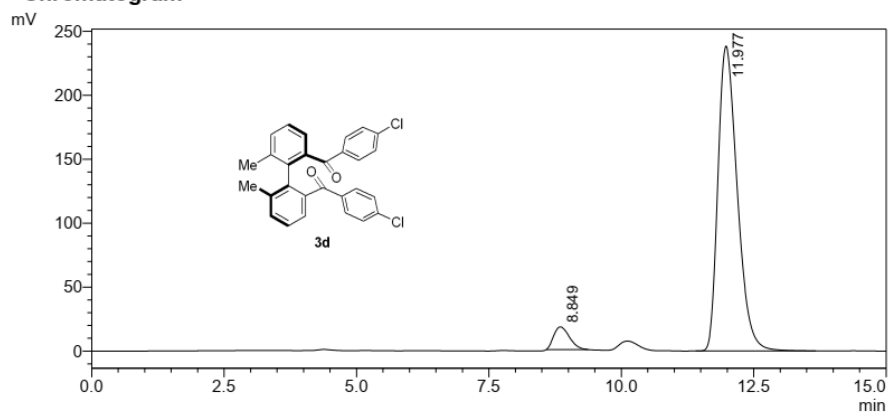

## <Peak Table>

Detector A Channel 1 254nm

| Peak# | Ret. Time | Area    | Height | Conc.  | Unit | Mark | Name |
|-------|-----------|---------|--------|--------|------|------|------|
| 1     | 8.849     | 365378  | 17694  | 5.700  |      |      |      |
| 2     | 11.977    | 6044466 | 238353 | 94.300 |      |      |      |
| Total |           | 6409844 | 256047 |        |      |      |      |

# <Chromatogram>

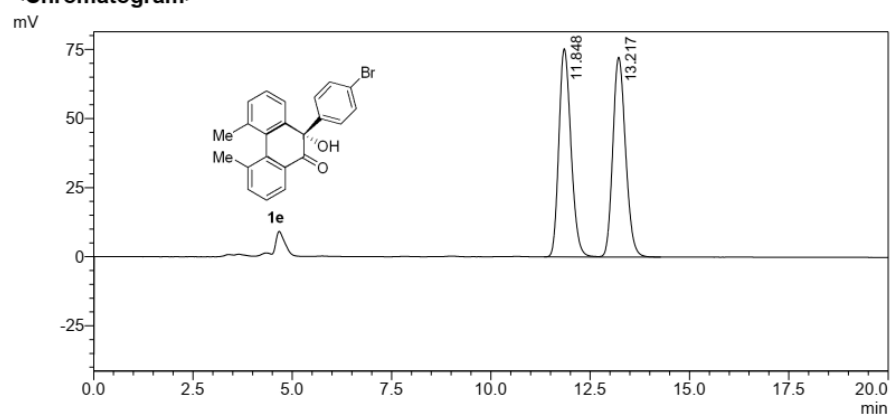

## <Peak Table>

Detector A Channel 1 254nm

| Peak# | Ret. Time | Area    | Height | Conc.  | Unit | Mark | Name |
|-------|-----------|---------|--------|--------|------|------|------|
| 1     | 11.848    | 1600900 | 75307  | 49.779 |      |      |      |
| 2     | 13.217    | 1615134 | 72252  | 50.221 |      |      |      |
| Total |           | 3216034 | 147559 |        |      |      |      |

# <Chromatogram>

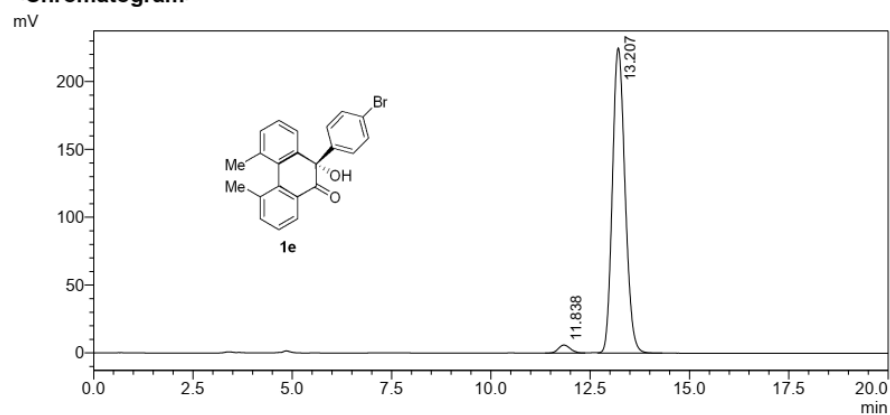

## <Peak Table>

Detector A Channel 1 254nm

| Peak# | Ret. Time | Area    | Height | Conc.  | Unit | Mark | Name |
|-------|-----------|---------|--------|--------|------|------|------|
| 1     | 11.838    | 125548  | 5938   | 2.450  |      |      |      |
| 2     | 13.207    | 4998206 | 224875 | 97.550 |      |      |      |
| Total |           | 5123754 | 230813 |        |      |      |      |

# <Chromatogram>

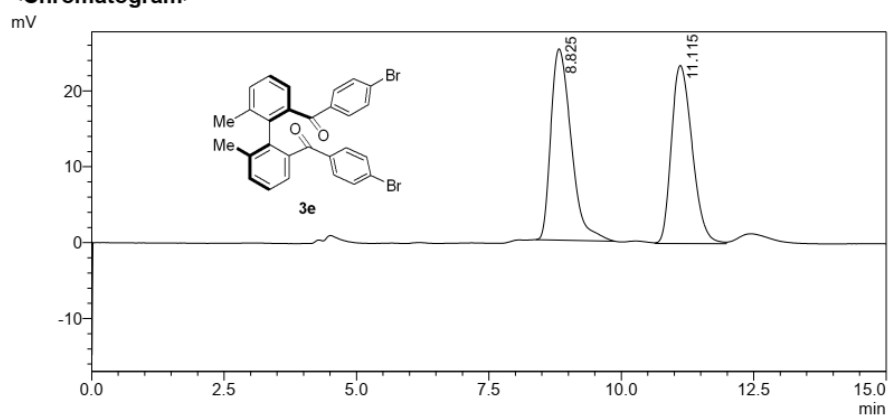

## <Peak Table>

Detector A Channel 1 254nm

| Peak# | Ret. Time | Area    | Height | Conc.  | Unit | Mark | Name |
|-------|-----------|---------|--------|--------|------|------|------|
| 1     | 8.825     | 671956  | 25191  | 51.163 |      |      |      |
| 2     | 11.115    | 641417  | 23470  | 48.837 |      |      |      |
| Total |           | 1313374 | 48660  |        |      |      |      |

# <Chromatogram>

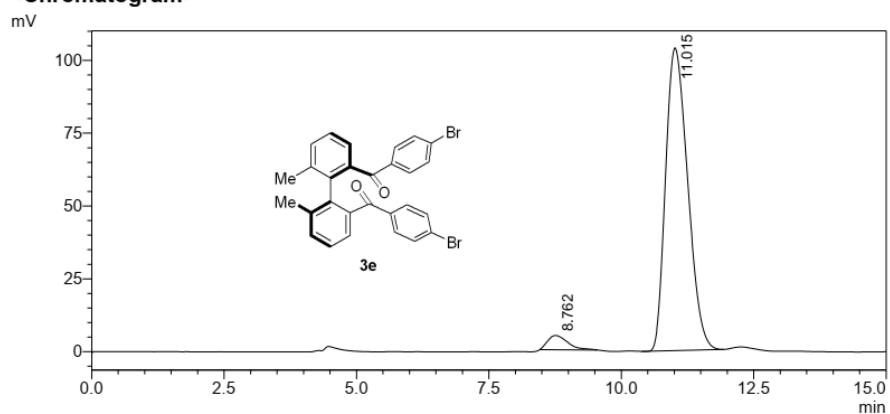

## <Peak Table>

Detector A Channel 1 254nm

| Peak# | Ret. Time | Area    | Height | Conc.  | Unit | Mark | Name |
|-------|-----------|---------|--------|--------|------|------|------|
| 1     | 8.762     | 130854  | 4925   | 4.155  |      |      |      |
| 2     | 11.015    | 3018602 | 103875 | 95.845 |      |      |      |
| Total |           | 3149456 | 108800 |        |      |      |      |

# <Chromatogram>

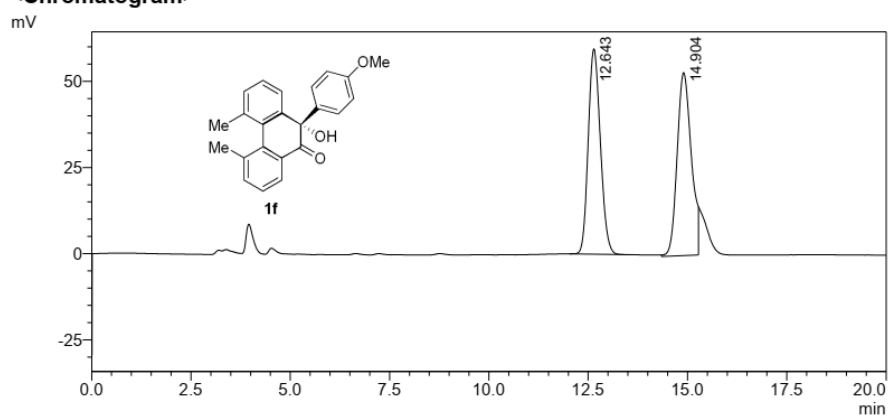

## <Peak Table>

Detector A Channel 1 254nm

| Peak# | Ret. Time | Area    | Height | Conc.  | Unit | Mark | Name |
|-------|-----------|---------|--------|--------|------|------|------|
| 1     | 12.643    | 1262361 | 59555  | 49.007 |      |      |      |
| 2     | 14.904    | 1313513 | 53106  | 50.993 |      |      |      |
| Total |           | 2575874 | 112661 |        |      |      |      |

# <Chromatogram>

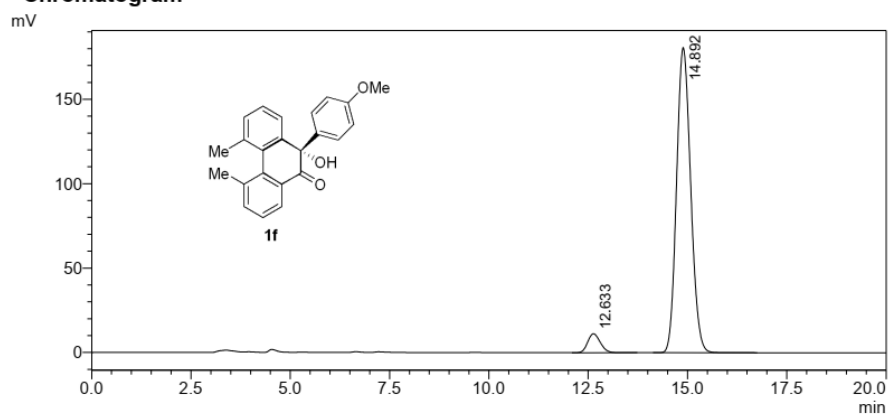

## <Peak Table>

Detector A Channel 1 254nm

| Peak# | Ret. Time | Area    | Height | Conc.  | Unit | Mark | Name |
|-------|-----------|---------|--------|--------|------|------|------|
| 1     | 12.633    | 250777  | 11273  | 5.314  |      |      |      |
| 2     | 14.892    | 4468186 | 180765 | 94.686 |      |      |      |
| Total |           | 4718963 | 192038 |        |      |      |      |



# <Chromatogram>

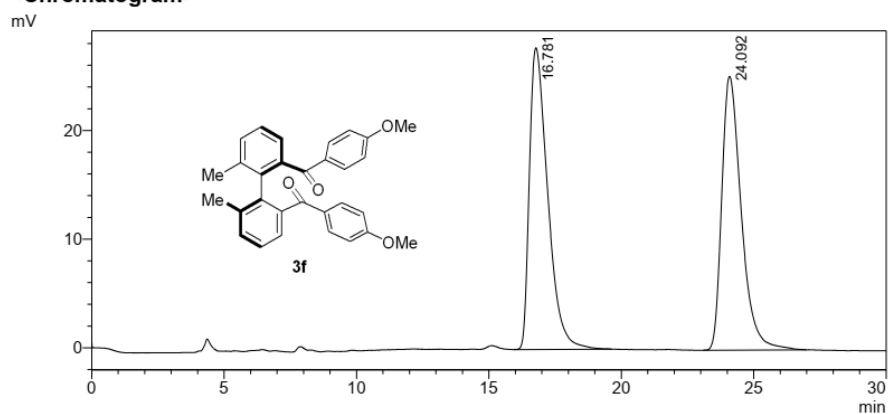

## <Peak Table>

Detector A Channel 1 254nm

| Peak# | Ret. Time | Area    | Height | Conc.  | Unit | Mark | Name |
|-------|-----------|---------|--------|--------|------|------|------|
| 1     | 16.781    | 1337192 | 27758  | 50.841 |      |      |      |
| 2     | 24.092    | 1292967 | 25203  | 49.159 |      |      |      |
| Total |           | 2630159 | 52961  |        |      |      |      |

# <Chromatogram>

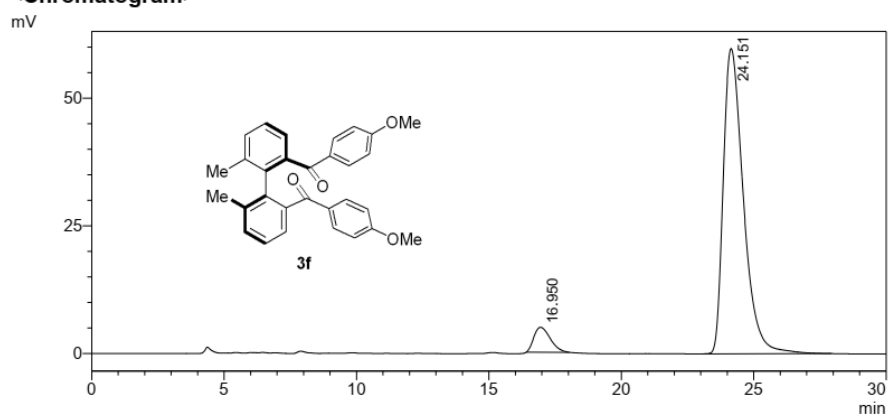

## <Peak Table>

Detector A Channel 1 254nm

| Peak# | Ret. Time | Area    | Height | Conc.  | Unit | Mark | Name |
|-------|-----------|---------|--------|--------|------|------|------|
| 1     | 16.950    | 209817  | 4884   | 6.222  |      |      |      |
| 2     | 24.151    | 3162426 | 59804  | 93.778 |      |      |      |
| Total |           | 3372244 | 64688  |        |      |      |      |

# <Chromatogram>

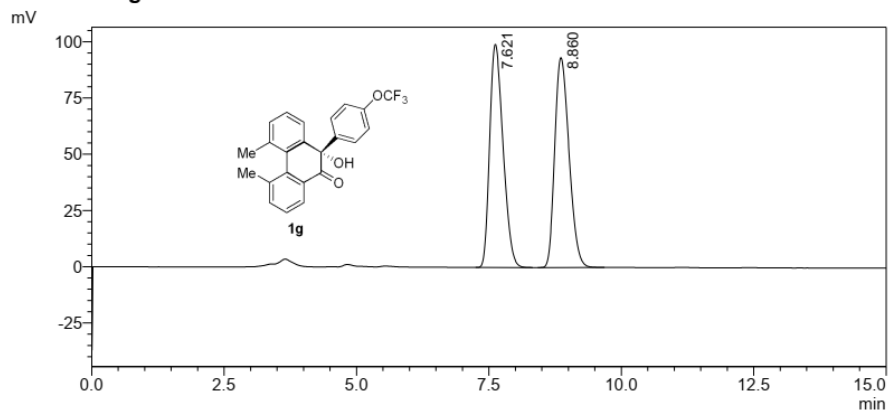

## <Peak Table>

Detector A Channel 1 254nm

| Peak# | Ret. Time | Area    | Height | Conc.  | Unit | Mark | Name |
|-------|-----------|---------|--------|--------|------|------|------|
| 1     | 7.621     | 1746858 | 99200  | 49.944 |      |      |      |
| 2     | 8.860     | 1750757 | 93304  | 50.056 |      |      |      |
| Total |           | 3497615 | 192505 |        |      |      |      |

# <Chromatogram>

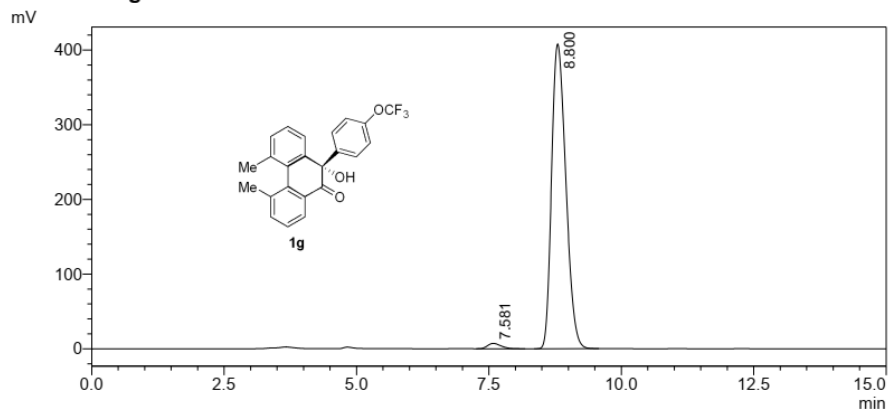

## <Peak Table>

Detector A Channel 1 254nm

| Peak# | Ret. Time | Area    | Height | Conc.  | Unit | Mark | Name |
|-------|-----------|---------|--------|--------|------|------|------|
| 1     | 7.581     | 126385  | 7188   | 1.631  |      |      |      |
| 2     | 8.800     | 7622506 | 407888 | 98.369 |      |      |      |
| Total |           | 7748891 | 415076 |        |      |      |      |

# <Chromatogram>

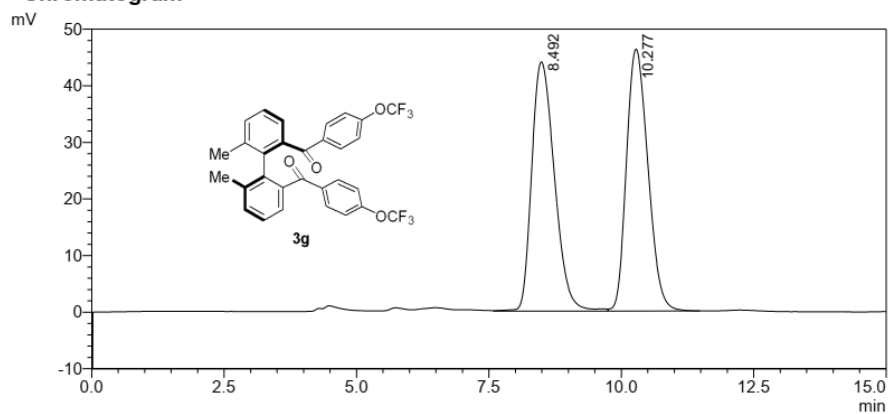

## <Peak Table>

Detector A Channel 1 254nm

| Peak# | Ret. Time | Area    | Height | Conc.  | Unit | Mark | Name |
|-------|-----------|---------|--------|--------|------|------|------|
| 1     | 8.492     | 1321264 | 44059  | 50.256 |      |      |      |
| 2     | 10.277    | 1307812 | 46273  | 49.744 |      |      |      |
| Total |           | 2629075 | 90332  |        |      |      |      |

# <Chromatogram>

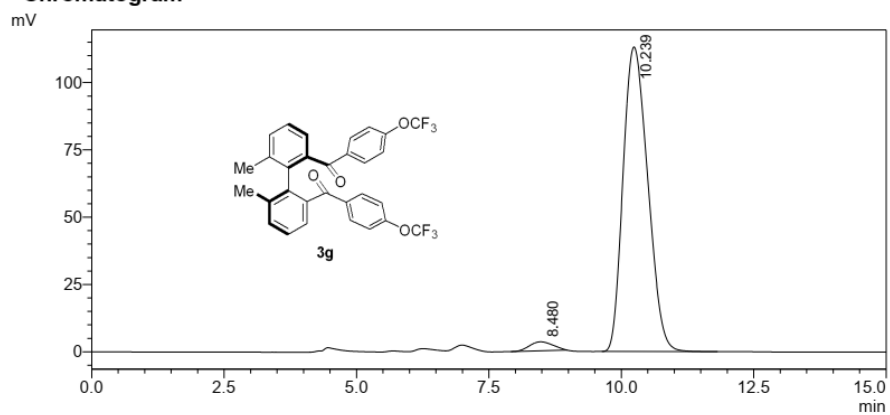

## <Peak Table>

Detector A Channel 1 254nm

| Peak# | Ret. Time | Area    | Height | Conc.  | Unit | Mark | Name |
|-------|-----------|---------|--------|--------|------|------|------|
| 1     | 8.480     | 102273  | 3331   | 2.711  |      |      |      |
| 2     | 10.239    | 3670377 | 113119 | 97.289 |      |      |      |
| Total |           | 3772650 | 116449 |        |      |      |      |

# <Chromatogram>

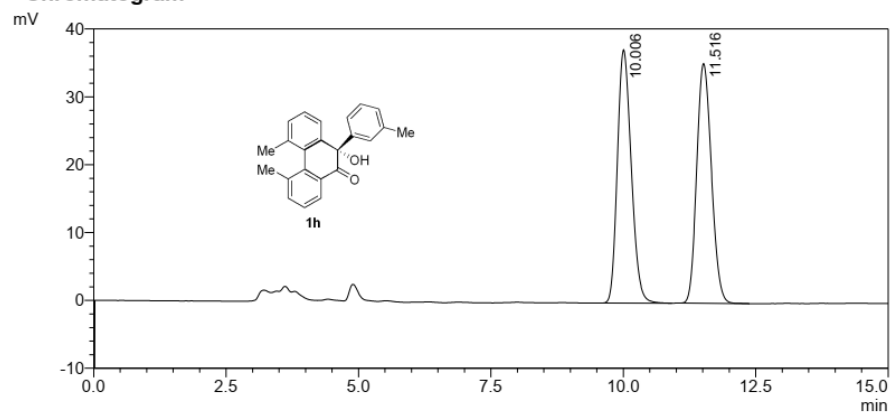

## <Peak Table>

Detector A Channel 1 254nm

| Peak# | Ret. Time | Area    | Height | Conc.  | Unit | Mark | Name |
|-------|-----------|---------|--------|--------|------|------|------|
| 1     | 10.006    | 682204  | 37359  | 50.051 |      |      |      |
| 2     | 11.516    | 680821  | 35314  | 49.949 |      |      |      |
| Total |           | 1363025 | 72672  |        |      |      |      |

# <Chromatogram>

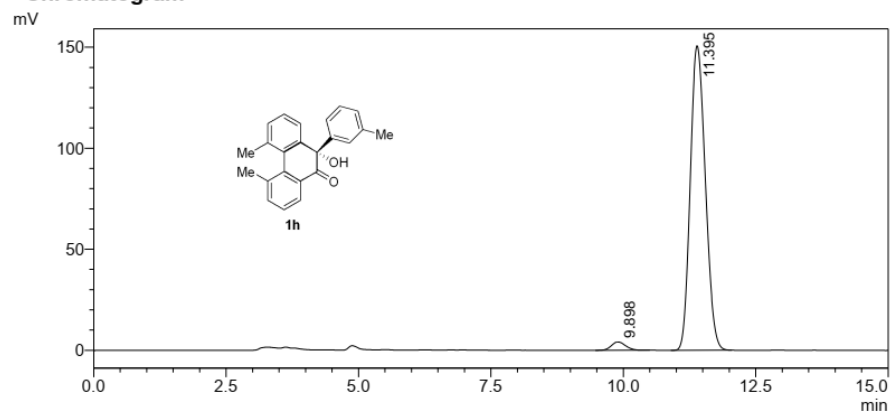

## <Peak Table>

Detector A Channel 1 254nm

| Peak# | Ret. Time | Area    | Height | Conc.  | Unit | Mark | Name |
|-------|-----------|---------|--------|--------|------|------|------|
| 1     | 9.898     | 76376   | 4098   | 2.492  |      |      |      |
| 2     | 11.395    | 2989049 | 150657 | 97.508 |      |      |      |
| Total |           | 3065425 | 154755 |        |      |      |      |

# <Chromatogram>

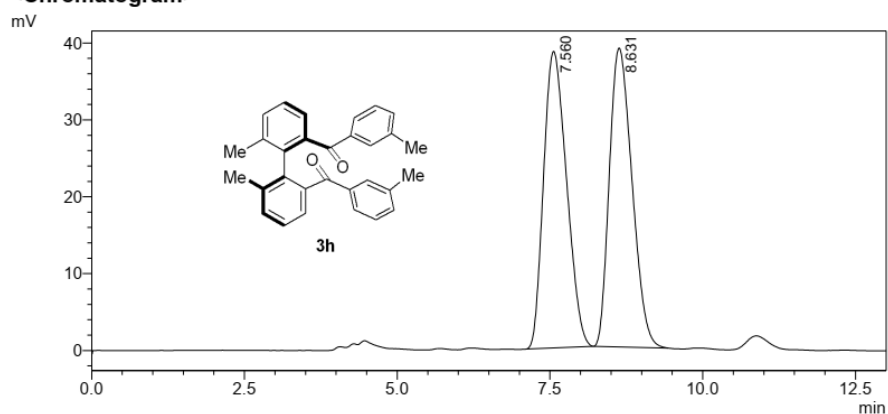

## <Peak Table>

Detector A Channel 1 254nm

| Peak# | Ret. Time | Area    | Height | Conc.  | Unit | Mark | Name |
|-------|-----------|---------|--------|--------|------|------|------|
| 1     | 7.560     | 1007829 | 38581  | 50.119 |      |      |      |
| 2     | 8.631     | 1003052 | 38875  | 49.881 |      |      |      |
| Total |           | 2010881 | 77456  |        |      |      |      |

# <Chromatogram>

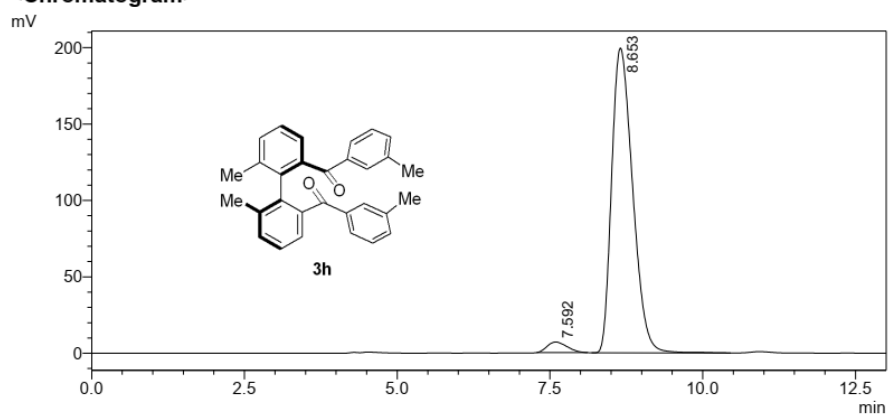

## <Peak Table>

Detector A Channel 1 254nm

| Peak# | Ret. Time | Area    | Height | Conc.  | Unit | Mark | Name |
|-------|-----------|---------|--------|--------|------|------|------|
| 1     | 7.592     | 157233  | 6924   | 3.194  |      |      |      |
| 2     | 8.653     | 4766237 | 199421 | 96.806 |      |      |      |
| Total |           | 4923470 | 206346 |        |      |      |      |

# <Chromatogram>

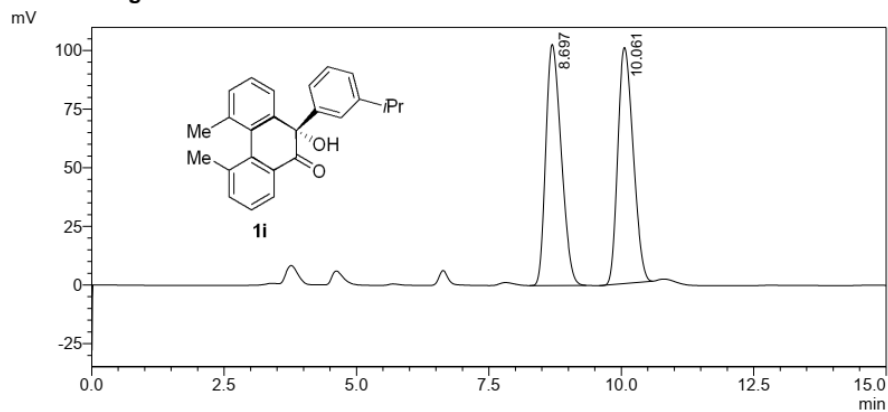

## <Peak Table>

Detector A Channel 1 254nm

| Peak# | Ret. Time | Area    | Height | Conc.  | Unit | Mark | Name |
|-------|-----------|---------|--------|--------|------|------|------|
| 1     | 8.697     | 2084753 | 102767 | 50.601 |      | M    |      |
| 2     | 10.061    | 2035268 | 100638 | 49.399 |      | M    |      |
| Total |           | 4120022 | 203405 |        |      |      |      |

# <Chromatogram>

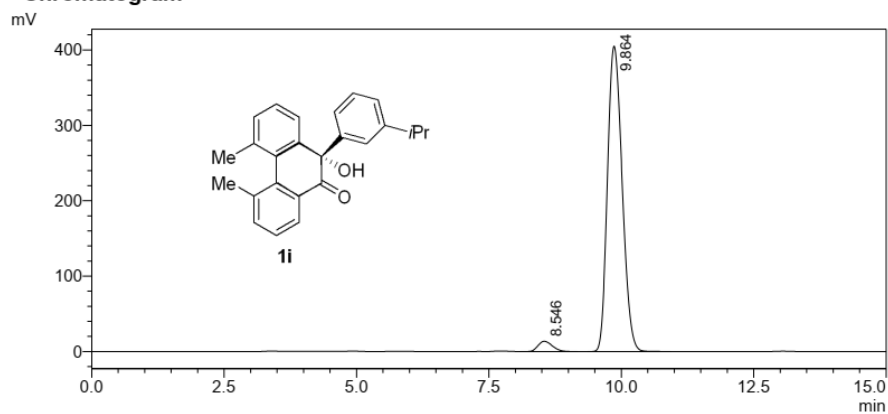

## <Peak Table>

Detector A Channel 1 254nm

| Peak# | Ret. Time | Area    | Height | Conc.  | Unit | Mark | Name |
|-------|-----------|---------|--------|--------|------|------|------|
| 1     | 8.546     | 255373  | 13569  | 3.170  |      | M    |      |
| 2     | 9.864     | 7801635 | 404920 | 96.830 |      | M    |      |
| Total |           | 8057009 | 418489 |        |      |      |      |

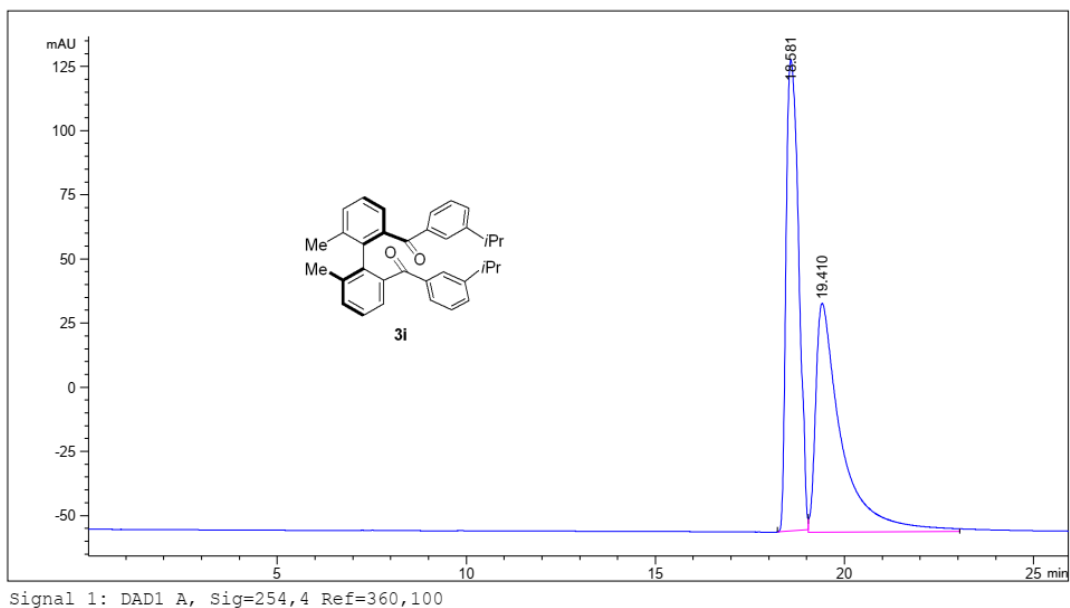

| Peak # | RetTime [min] | Type | Width [min] | Area [mAU*s] | Height [mAU] | Area %  |
|--------|---------------|------|-------------|--------------|--------------|---------|
| 1      | 18.581        | BV   | 0.3760      | 4249.53760   | 183.62791    | 50.1707 |
| 2      | 19.410        | MM   | 0.7879      | 4220.61426   | 89.28460     | 49.8293 |

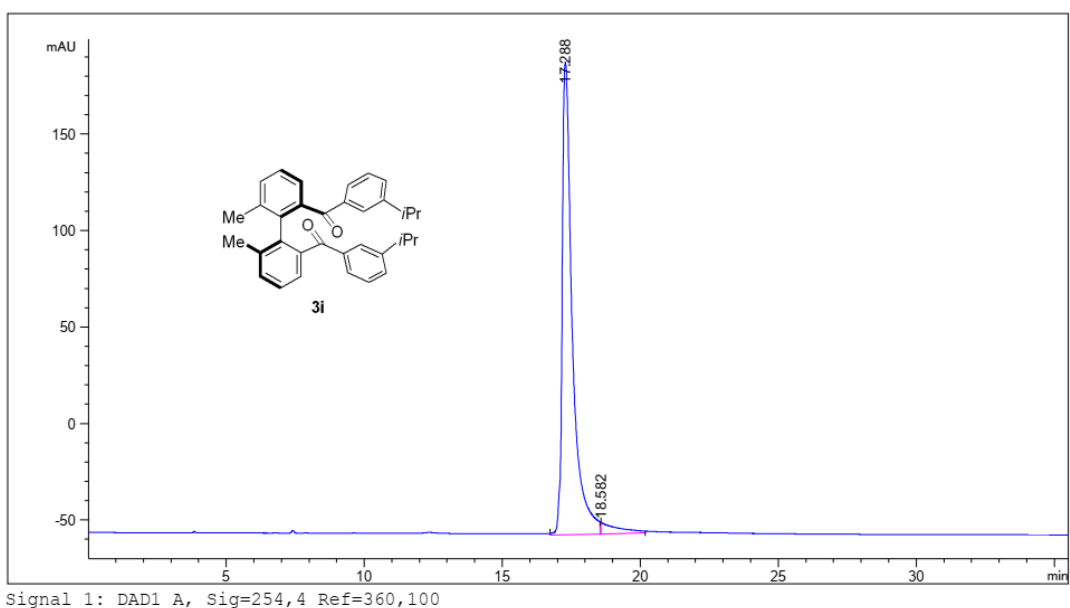

| Peak # | RetTime [min] | Type | Width [min] | Area [mAU*s] | Height [mAU] | Area %  |
|--------|---------------|------|-------------|--------------|--------------|---------|
| 1      | 17.288        | MM   | 0.4252      | 6245.22021   | 244.77715    | 96.0970 |
| 2      | 18.582        | MM   | 0.5013      | 253.65062    | 5.92736      | 3.9030  |

# <Chromatogram>

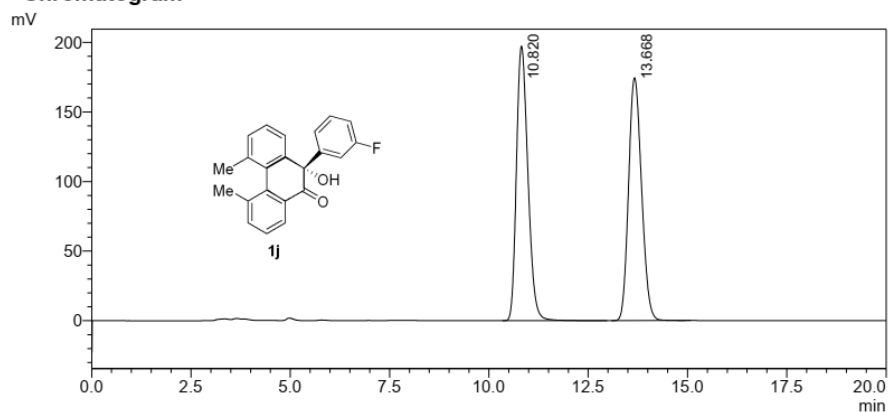

## <Peak Table>

Detector A Channel 1 254nm

| Peak# | Ret. Time | Area    | Height | Conc.  | Unit | Mark | Name |
|-------|-----------|---------|--------|--------|------|------|------|
| 1     | 10.820    | 3960052 | 197146 | 49.948 |      |      |      |
| 2     | 13.668    | 3968298 | 174478 | 50.052 |      |      |      |
| Total |           | 7928349 | 371625 |        |      |      |      |

# <Chromatogram>

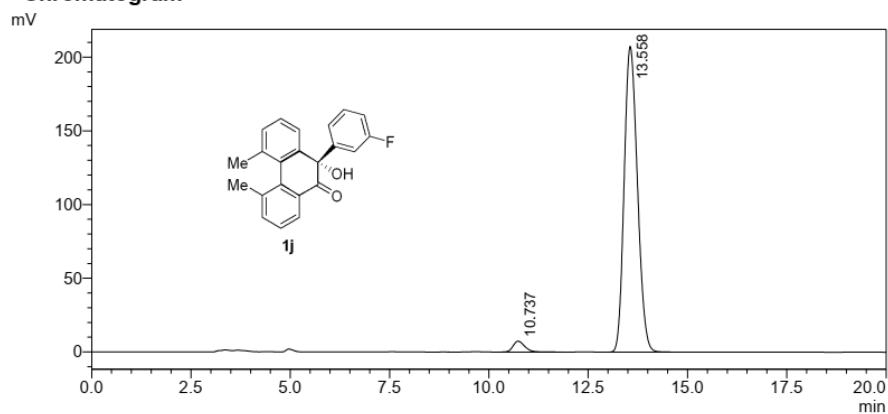

## <Peak Table>

Detector A Channel 1 254nm

| Peak# | Ret. Time | Area    | Height | Conc.  | Unit | Mark | Name |
|-------|-----------|---------|--------|--------|------|------|------|
| 1     | 10.737    | 154393  | 7359   | 3.109  |      |      |      |
| 2     | 13.558    | 4812187 | 207352 | 96.891 |      |      |      |
| Total |           | 4966580 | 214711 |        |      |      |      |



# <Chromatogram>

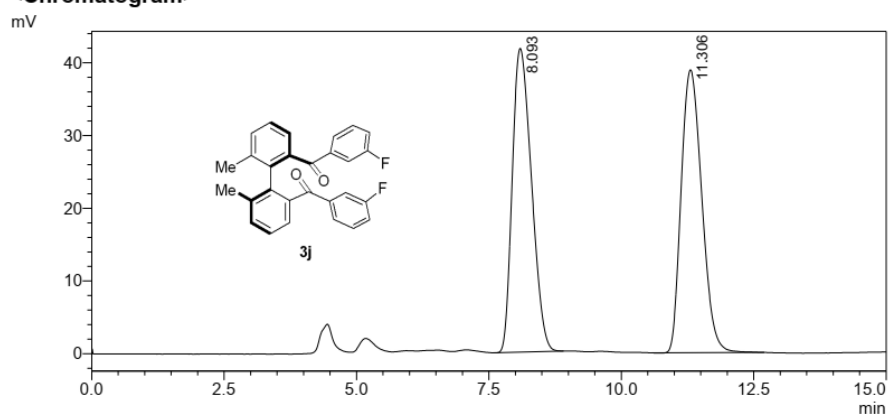

## <Peak Table>

Detector A Channel 1 254nm

| Peak# | Ret. Time | Area    | Height | Conc.  | Unit | Mark | Name |
|-------|-----------|---------|--------|--------|------|------|------|
| 1     | 8.093     | 1052522 | 41726  | 49.970 |      |      |      |
| 2     | 11.306    | 1053789 | 38884  | 50.030 |      |      |      |
| Total |           | 2106311 | 80610  |        |      |      |      |

# <Chromatogram>

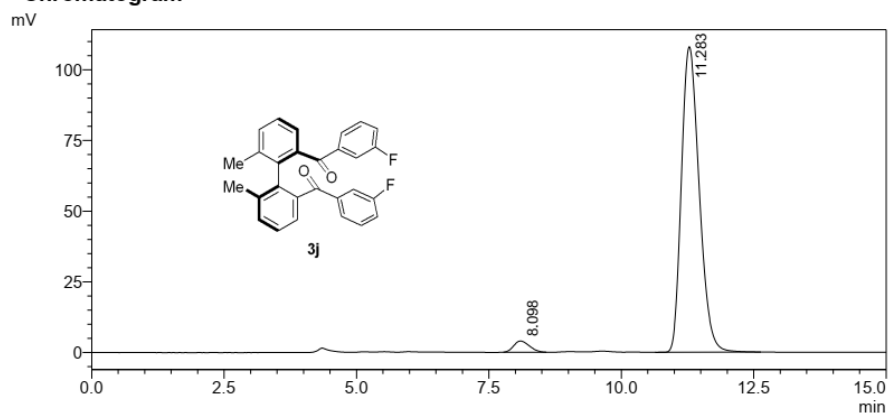

## <Peak Table>

Detector A Channel 1 254nm

| Peak# | Ret. Time | Area    | Height | Conc.  | Unit | Mark | Name |
|-------|-----------|---------|--------|--------|------|------|------|
| 1     | 8.098     | 80999   | 3932   | 3.108  |      |      |      |
| 2     | 11.283    | 2524892 | 108028 | 96.892 |      |      |      |
| Total |           | 2605891 | 111960 |        |      |      |      |

# <Chromatogram>

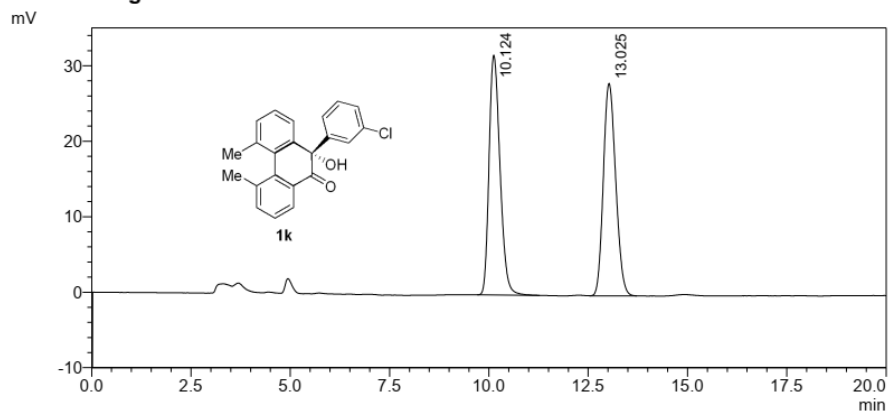

## <Peak Table>

Detector A Channel 1 254nm

| Peak# | Ret. Time | Area    | Height | Conc.  | Unit | Mark | Name |
|-------|-----------|---------|--------|--------|------|------|------|
| 1     | 10.124    | 609553  | 31747  | 50.053 |      |      |      |
| 2     | 13.025    | 608274  | 28126  | 49.947 |      |      |      |
| Total |           | 1217827 | 59873  |        |      |      |      |

# <Chromatogram>

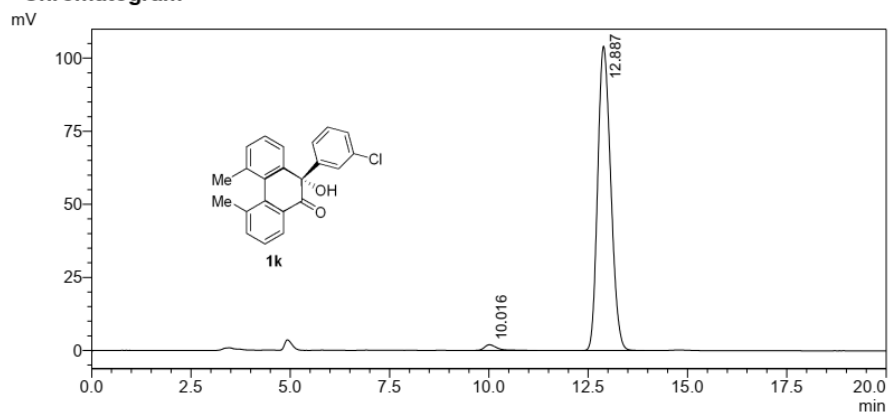

## <Peak Table>

Detector A Channel 1 254nm

| Peak# | Ret. Time | Area    | Height | Conc.  | Unit | Mark | Name |
|-------|-----------|---------|--------|--------|------|------|------|
| 1     | 10.016    | 45009   | 1972   | 1.854  |      |      |      |
| 2     | 12.887    | 2383321 | 104101 | 98.146 |      |      |      |
| Total |           | 2428330 | 106074 |        |      |      |      |

# <Chromatogram>

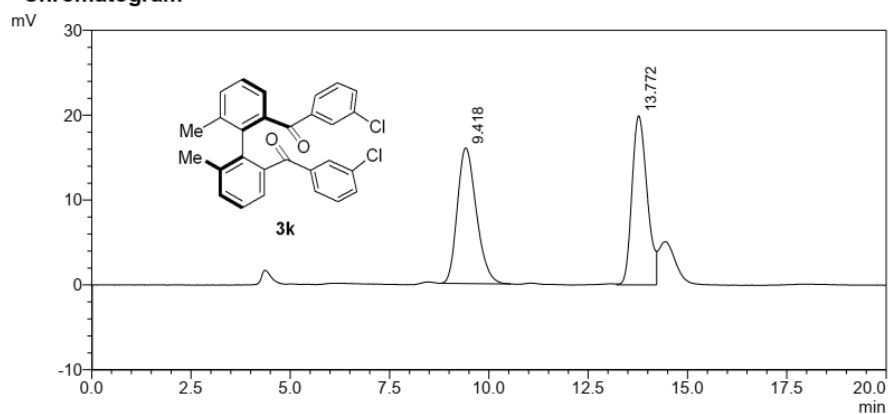

## <Peak Table>

Detector A Channel 1 254nm

| Peak# | Ret. Time | Area    | Height | Conc.  | Unit | Mark | Name |
|-------|-----------|---------|--------|--------|------|------|------|
| 1     | 9.418     | 534012  | 15973  | 50.128 |      |      |      |
| 2     | 13.772    | 531291  | 19936  | 49.872 |      |      |      |
| Total |           | 1065303 | 35909  |        |      |      |      |

# <Chromatogram>

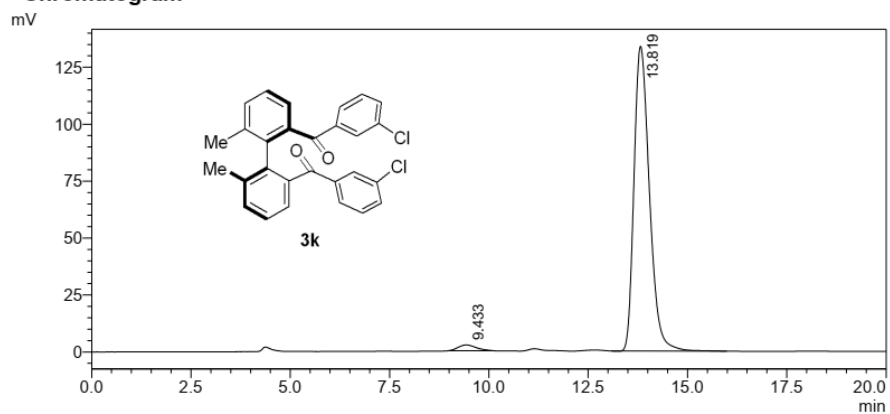

## <Peak Table>

Detector A Channel 1 254nm

| Peak# | Ret. Time | Area    | Height | Conc.  | Unit | Mark | Name |
|-------|-----------|---------|--------|--------|------|------|------|
| 1     | 9.433     | 78280   | 2497   | 2.118  |      |      |      |
| 2     | 13.819    | 3617034 | 133730 | 97.882 |      |      |      |
| Total |           | 3695314 | 136227 |        |      |      |      |

# <Chromatogram>

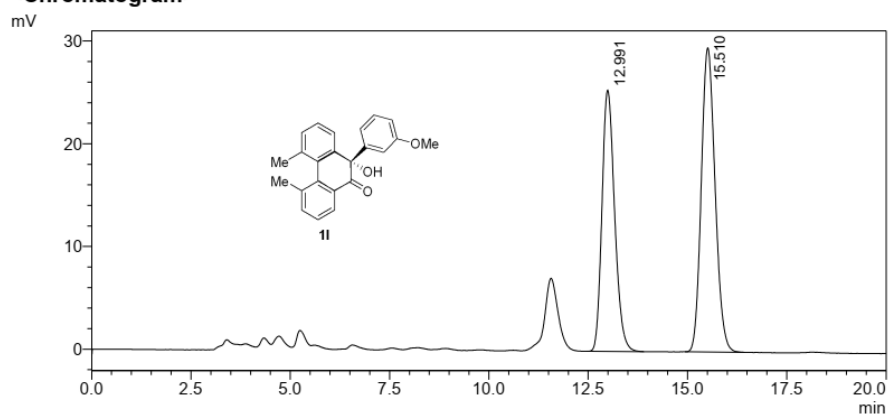

## <Peak Table>

Detector A Channel 1 254nm

| Peak# | Ret. Time | Area    | Height | Conc.  | Unit | Mark | Name |
|-------|-----------|---------|--------|--------|------|------|------|
| 1     | 12.991    | 564901  | 25431  | 44.072 |      |      |      |
| 2     | 15.510    | 716856  | 29606  | 55.928 |      |      |      |
| Total |           | 1281757 | 55037  |        |      |      |      |

# <Chromatogram>

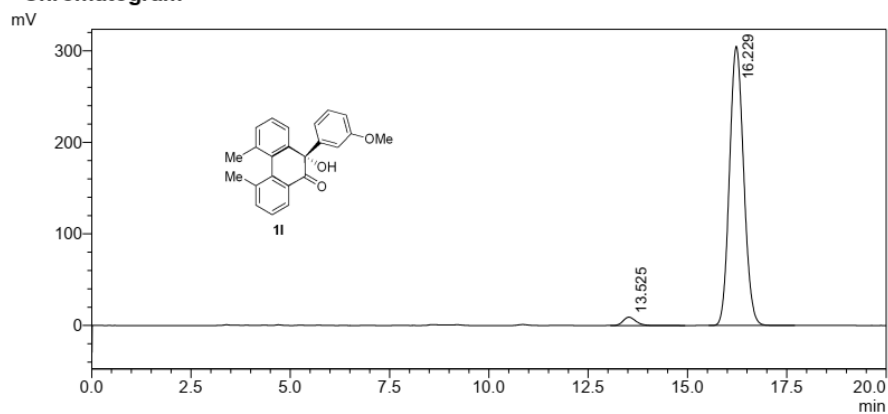

## <Peak Table>

Detector A Channel 1 254nm

| Peak# | Ret. Time | Area    | Height | Conc.  | Unit | Mark | Name |
|-------|-----------|---------|--------|--------|------|------|------|
| 1     | 13.525    | 207299  | 9140   | 2.664  |      |      |      |
| 2     | 16.229    | 7573810 | 304696 | 97.336 |      |      |      |
| Total |           | 7781108 | 313836 |        |      |      |      |

# <Chromatogram>

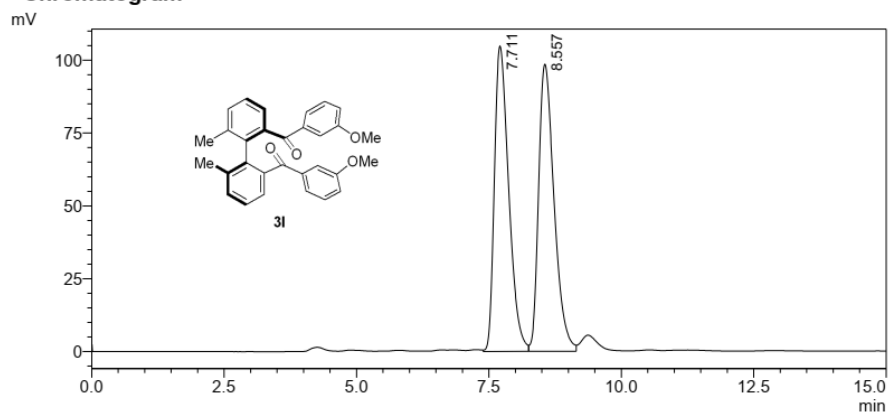

## <Peak Table>

Detector A Channel 1 254nm

| Peak# | Ret. Time | Area    | Height | Conc.  | Unit | Mark | Name |
|-------|-----------|---------|--------|--------|------|------|------|
| 1     | 7.711     | 1976851 | 104771 | 49.711 |      |      |      |
| 2     | 8.557     | 1999828 | 98579  | 50.289 |      |      |      |
| Total |           | 3976679 | 203349 |        |      |      |      |

# <Chromatogram>

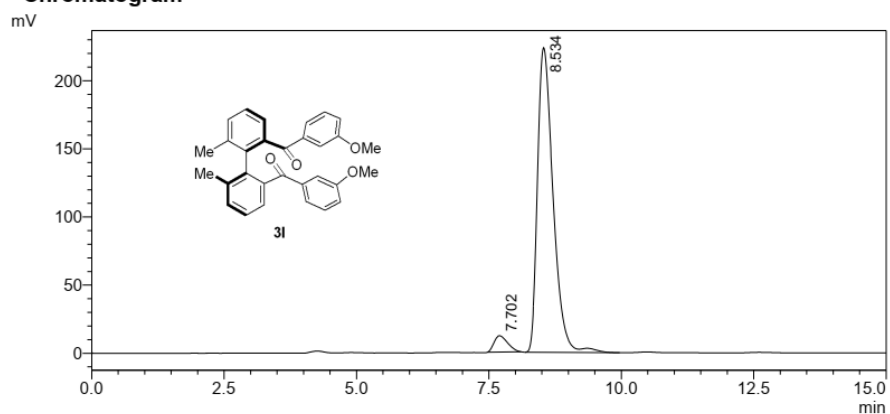

## <Peak Table>

Detector A Channel 1 254nm

| Peak# | Ret. Time | Area    | Height | Conc.  | Unit | Mark | Name |
|-------|-----------|---------|--------|--------|------|------|------|
| 1     | 7.702     | 212745  | 11968  | 4.445  |      |      |      |
| 2     | 8.534     | 4573331 | 223531 | 95.555 |      |      |      |
| Total |           | 4786076 | 235498 |        |      |      |      |

# <Chromatogram>

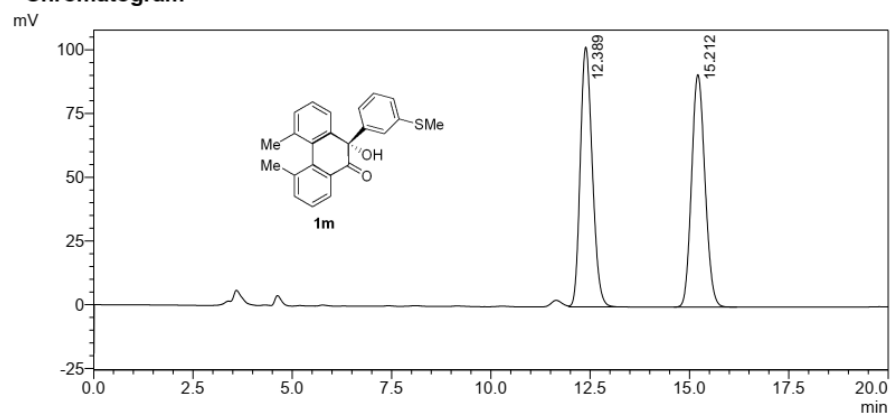

## <Peak Table>

Detector A Channel 1 254nm

| Peak# | Ret. Time | Area    | Height | Conc.  | Unit | Mark | Name |
|-------|-----------|---------|--------|--------|------|------|------|
| 1     | 12.389    | 2147809 | 101893 | 50.013 |      |      |      |
| 2     | 15.212    | 2146668 | 91195  | 49.987 |      |      |      |
| Total |           | 4294478 | 193088 |        |      |      |      |

# <Chromatogram>

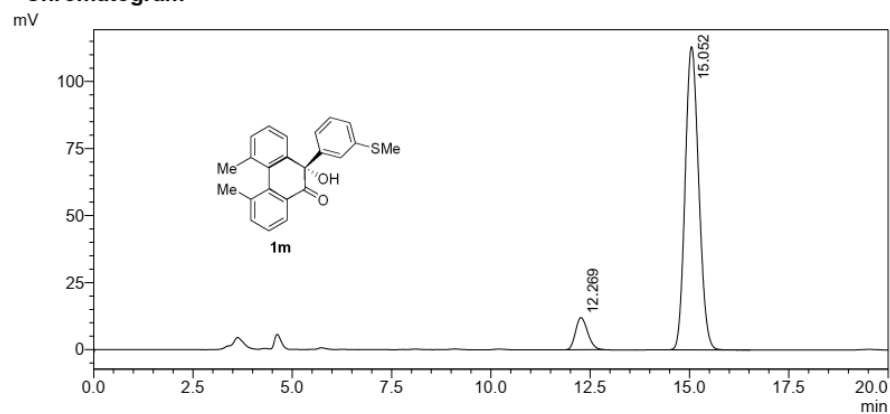

## <Peak Table>

Detector A Channel 1 254nm

| Peak# | Ret. Time | Area    | Height | Conc.  | Unit | Mark | Name |
|-------|-----------|---------|--------|--------|------|------|------|
| 1     | 12.269    | 254278  | 11996  | 8.621  |      |      |      |
| 2     | 15.052    | 2695405 | 113035 | 91.379 |      |      |      |
| Total |           | 2949683 | 125031 |        |      |      |      |

# <Chromatogram>

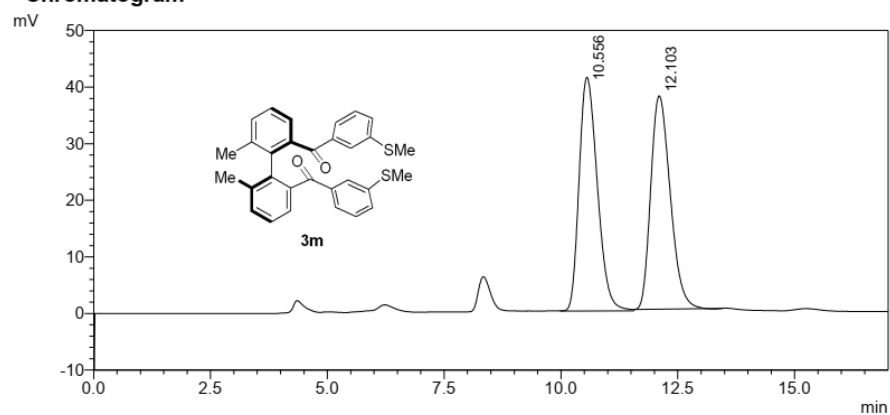

## <Peak Table>

Detector A Channel 1 254nm

| Peak# | Ret. Time | Area    | Height | Conc.  | Unit | Mark | Name |
|-------|-----------|---------|--------|--------|------|------|------|
| 1     | 10.556    | 1123543 | 41305  | 50.668 |      |      |      |
| 2     | 12.103    | 1093925 | 37682  | 49.332 |      |      |      |
| Total |           | 2217468 | 78987  |        |      |      |      |

# <Chromatogram>

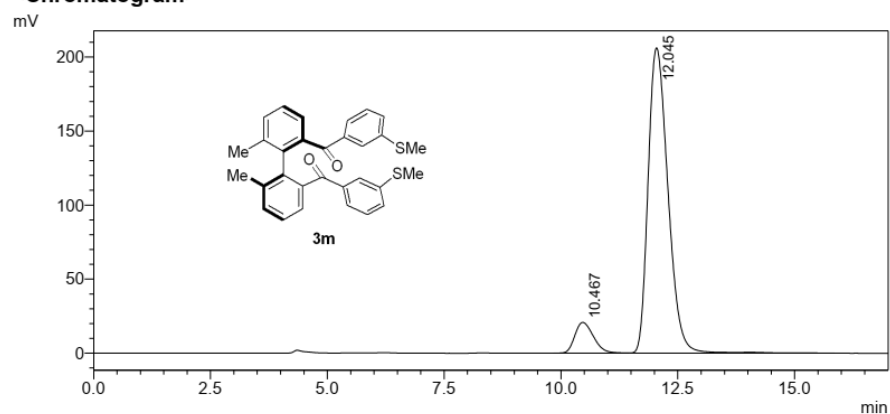

## <Peak Table>

Detector A Channel 1 254nm

| Peak# | Ret. Time | Area    | Height | Conc.  | Unit | Mark | Name |
|-------|-----------|---------|--------|--------|------|------|------|
| 1     | 10.467    | 579641  | 20809  | 8.651  |      |      |      |
| 2     | 12.045    | 6120293 | 206172 | 91.349 |      |      |      |
| Total |           | 6699934 | 226981 |        |      |      |      |

# <Chromatogram>

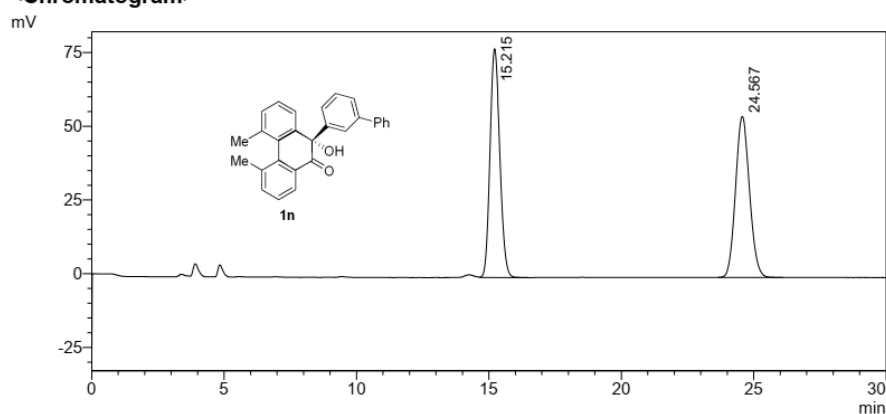

## <Peak Table>

| Detector A Channel 1 254nm |           |         |        |        |      |      |
|----------------------------|-----------|---------|--------|--------|------|------|
| Peak#                      | Ret. Time | Area    | Height | Conc.  | Unit | Name |
| 1                          | 15.215    | 2001710 | 77543  | 50.002 |      |      |
| 2                          | 24.567    | 2001520 | 54595  | 49.998 |      |      |
| Total                      |           | 4003230 | 132138 |        |      |      |

# <Chromatogram>

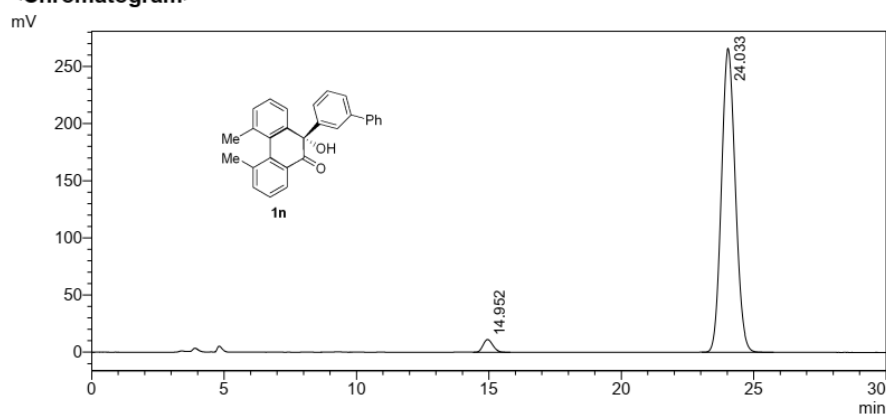

## <Peak Table>

| Detector A Channel 1 254nm |           |          |        |        |      |      |
|----------------------------|-----------|----------|--------|--------|------|------|
| Peak#                      | Ret. Time | Area     | Height | Conc.  | Unit | Name |
| 1                          | 14.952    | 285263   | 11117  | 2.849  |      |      |
| 2                          | 24.033    | 9726831  | 265960 | 97.151 |      |      |
| Total                      |           | 10012094 | 277078 |        |      |      |



# <Chromatogram>

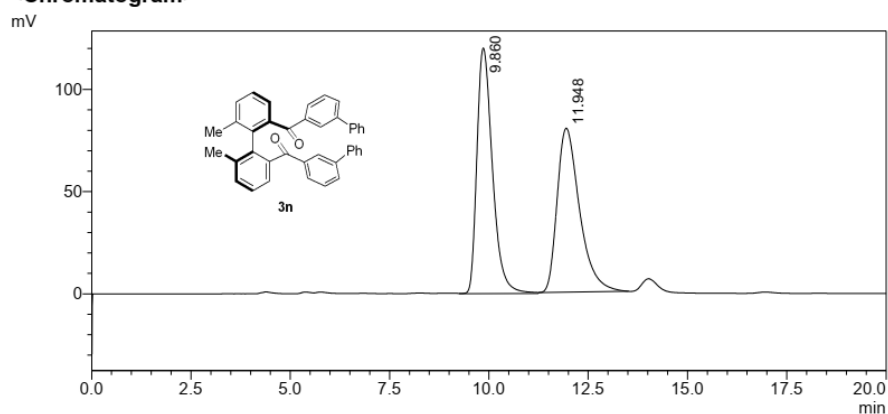

## <Peak Table>

Detector A Channel 1 254nm

| Peak# | Ret. Time | Area    | Height | Conc.  | Unit | Mark | Name |
|-------|-----------|---------|--------|--------|------|------|------|
| 1     | 9.860     | 3268242 | 120107 | 50.921 |      |      |      |
| 2     | 11.948    | 3149957 | 80177  | 49.079 |      |      |      |
| Total |           | 6418198 | 200283 |        |      |      |      |

# <Chromatogram>

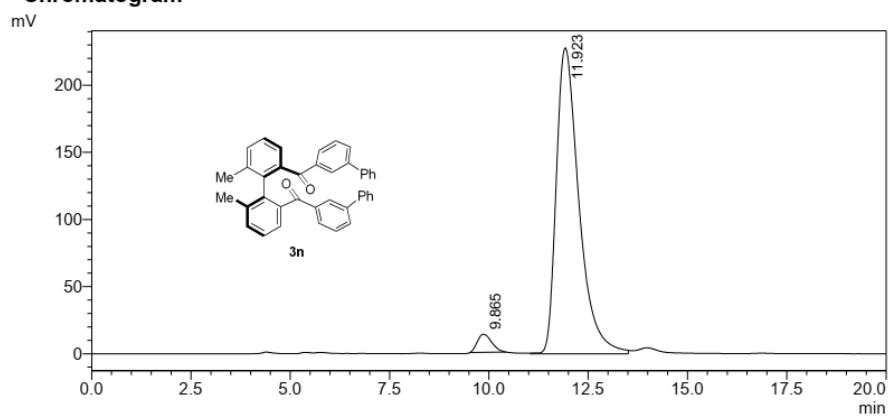

## <Peak Table>

Detector A Channel 1 254nm

| Peak# | Ret. Time | Area    | Height | Conc.  | Unit | Mark | Name |
|-------|-----------|---------|--------|--------|------|------|------|
| 1     | 9.865     | 338448  | 13482  | 3.603  |      |      |      |
| 2     | 11.923    | 9055898 | 227852 | 96.397 |      |      |      |
| Total |           | 9394346 | 241334 |        |      |      |      |

# <Chromatogram>

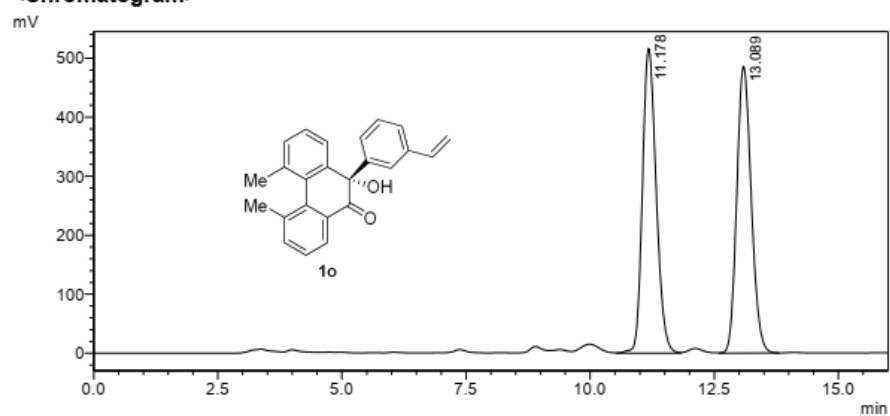

## <Peak Table>

Detector A Channel 1 254nm

| Peak# | Ret. Time | Area     | Height  | Conc.  | Unit | Mark | Name |
|-------|-----------|----------|---------|--------|------|------|------|
| 1     | 11.178    | 9914469  | 515863  | 50.201 |      |      |      |
| 2     | 13.089    | 9835225  | 485681  | 49.799 |      |      |      |
| Total |           | 19749694 | 1001543 |        |      |      |      |

# <Chromatogram>

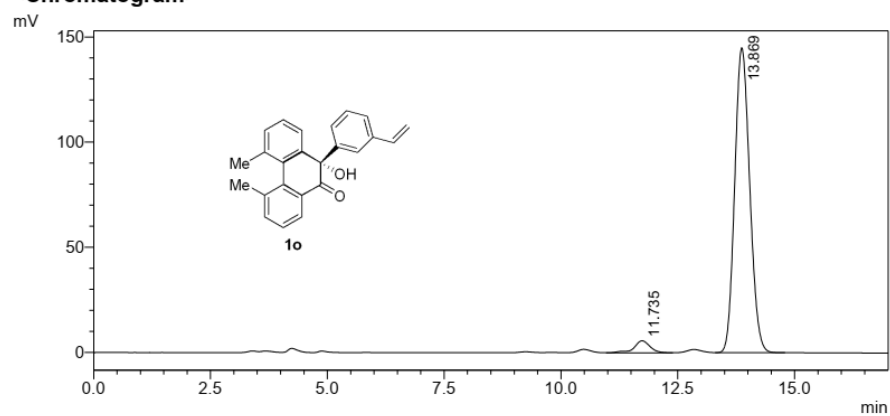

## <Peak Table>

Detector A Channel 1 254nm

| Peak# | Ret. Time | Area    | Height | Conc.  | Unit | Mark | Name |
|-------|-----------|---------|--------|--------|------|------|------|
| 1     | 11.735    | 137297  | 5721   | 4.065  |      |      |      |
| 2     | 13.869    | 3240567 | 144936 | 95.935 |      |      |      |
| Total |           | 3377864 | 150657 |        |      |      |      |

# <Chromatogram>

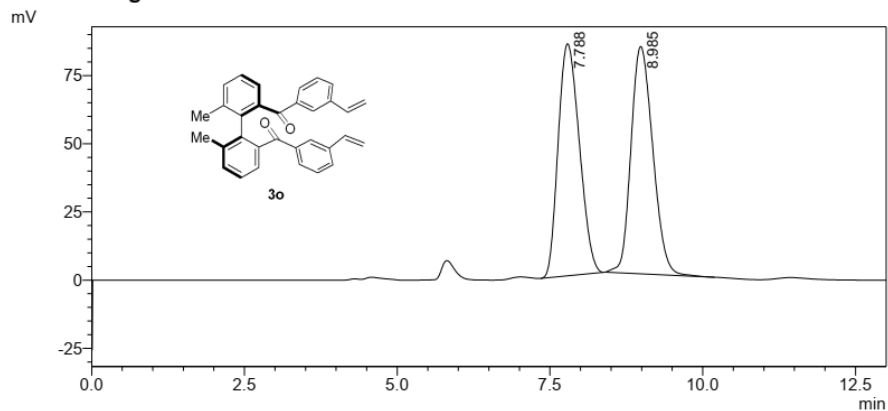

## <Peak Table>

Detector A Channel 1 254nm

| Peak# | Ret. Time | Area    | Height | Conc.  | Unit | Mark | Name |
|-------|-----------|---------|--------|--------|------|------|------|
| 1     | 7.788     | 2050502 | 85008  | 49.733 |      |      |      |
| 2     | 8.985     | 2072516 | 83369  | 50.267 |      |      |      |
| Total |           | 4123018 | 168377 |        |      |      |      |

# <Chromatogram>

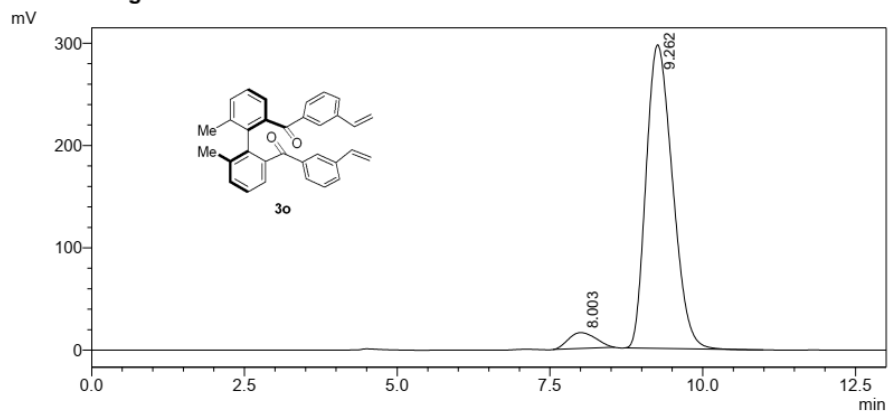

## <Peak Table>

Detector A Channel 1 254nm

| Peak# | Ret. Time | Area    | Height | Conc.  | Unit | Mark | Name |
|-------|-----------|---------|--------|--------|------|------|------|
| 1     | 8.003     | 488553  | 15566  | 5.195  |      |      |      |
| 2     | 9.262     | 8916071 | 296618 | 94.805 |      |      |      |
| Total |           | 9404624 | 312184 |        |      |      |      |

# <Chromatogram>

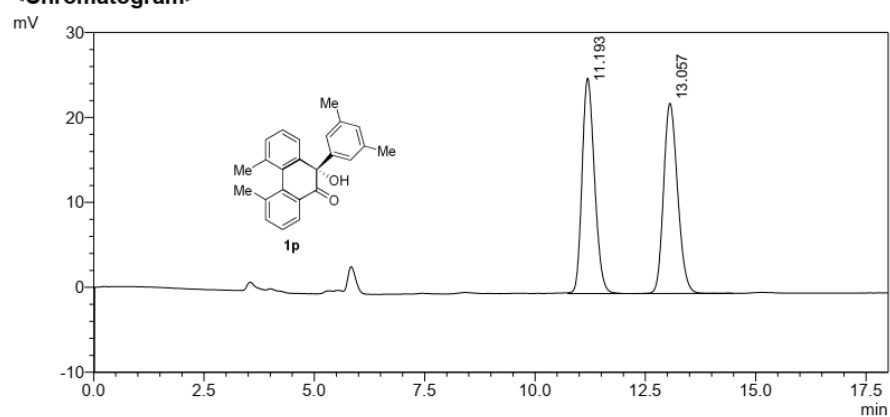

## <Peak Table>

Detector A Channel 1 254nm

| Peak# | Ret. Time | Area   | Height | Conc.  | Unit | Mark | Name |
|-------|-----------|--------|--------|--------|------|------|------|
| 1     | 11.193    | 498008 | 25348  | 50.120 |      |      |      |
| 2     | 13.057    | 495628 | 22405  | 49.880 |      |      |      |
| Total |           | 993636 | 47753  |        |      |      |      |

# <Chromatogram>

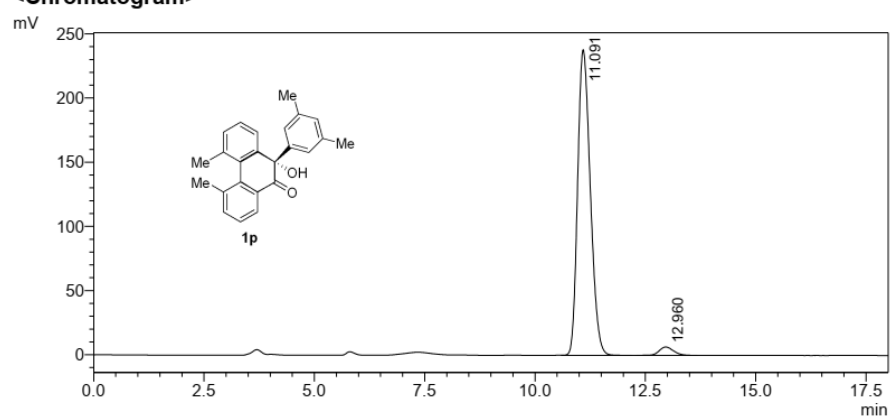

## <Peak Table>

Detector A Channel 1 254nm

| Peak# | Ret. Time | Area    | Height | Conc.  | Unit | Mark | Name |
|-------|-----------|---------|--------|--------|------|------|------|
| 1     | 11.091    | 4747802 | 238031 | 97.010 |      |      |      |
| 2     | 12.960    | 146346  | 6530   | 2.990  |      |      |      |
| Total |           | 4894148 | 244561 |        |      |      |      |

# <Chromatogram>

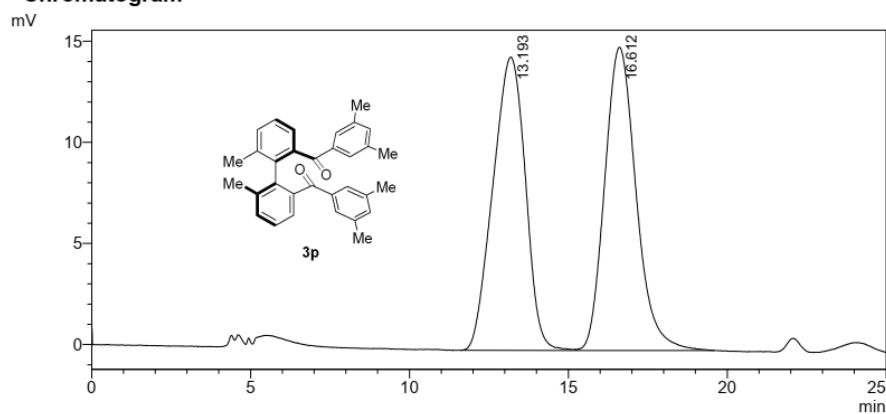

## <Peak Table>

Detector A Channel 1 254nm

| Peak# | Ret. Time | Area    | Height | Conc.  | Unit | Mark | Name |
|-------|-----------|---------|--------|--------|------|------|------|
| 1     | 13.193    | 1032111 | 14507  | 50.001 |      |      |      |
| 2     | 16.612    | 1032078 | 14994  | 49.999 |      |      |      |
| Total |           | 2064189 | 29501  |        |      |      |      |

# <Chromatogram>

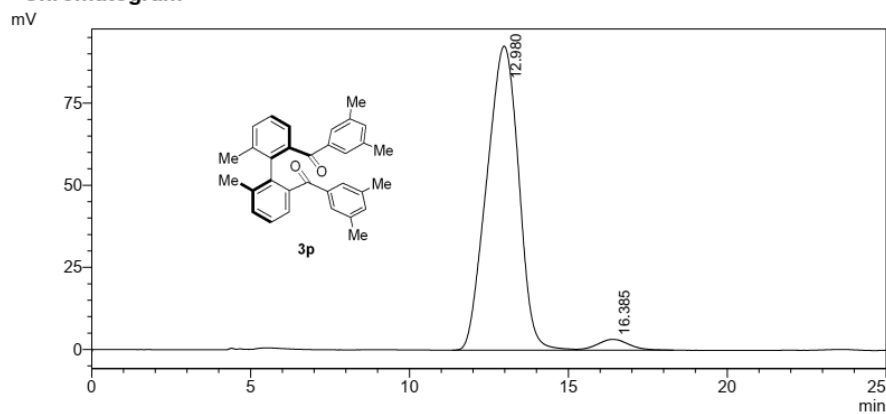

## <Peak Table>

Detector A Channel 1 254nm

| Peak# | Ret. Time | Area    | Height | Conc.  | Unit | Mark | Name |
|-------|-----------|---------|--------|--------|------|------|------|
| 1     | 12.980    | 6457181 | 92567  | 96.571 |      |      |      |
| 2     | 16.385    | 229249  | 3305   | 3.429  |      |      |      |
| Total |           | 6686430 | 95872  |        |      |      |      |

# <Chromatogram>

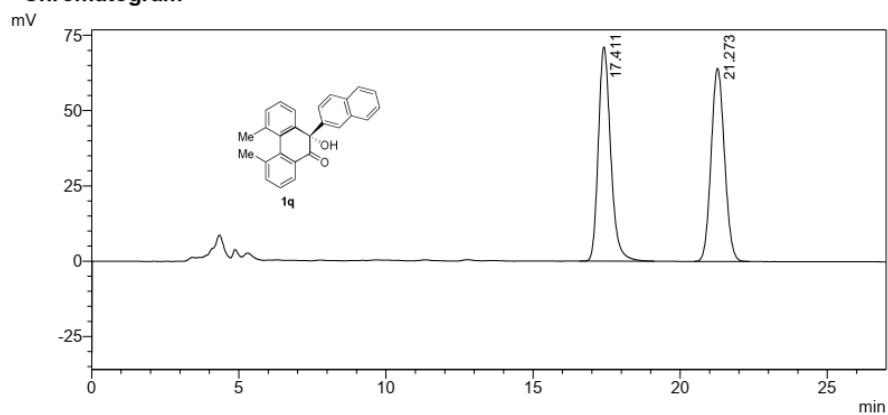

## <Peak Table>

Detector A Channel 1 254nm

| Peak# | Ret. Time | Area    | Height | Conc.  | Unit | Mark | Name |
|-------|-----------|---------|--------|--------|------|------|------|
| 1     | 17.411    | 2076907 | 71123  | 50.563 |      |      |      |
| 2     | 21.273    | 2030681 | 64135  | 49.437 |      |      |      |
| Total |           | 4107588 | 135259 |        |      |      |      |

# <Chromatogram>

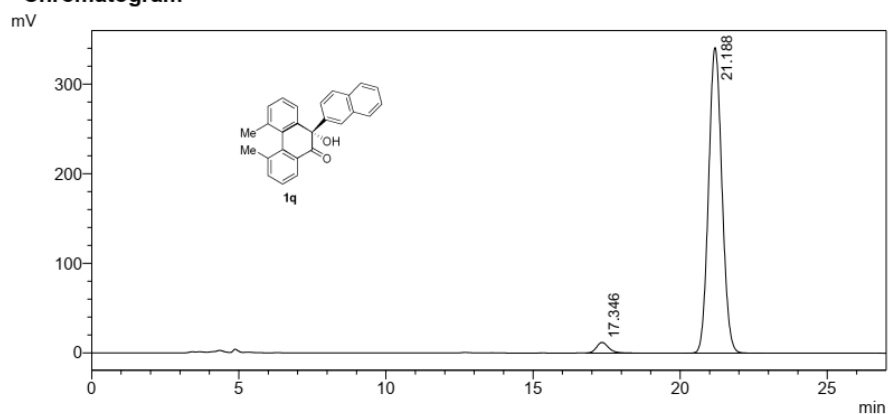

## <Peak Table>

Detector A Channel 1 254nm

| Peak# | Ret. Time | Area     | Height | Conc.  | Unit | Mark | Name |
|-------|-----------|----------|--------|--------|------|------|------|
| 1     | 17.346    | 342467   | 11827  | 3.086  |      |      |      |
| 2     | 21.188    | 10753770 | 340887 | 96.914 |      |      |      |
| Total |           | 11096237 | 352715 |        |      |      |      |

# <Chromatogram>

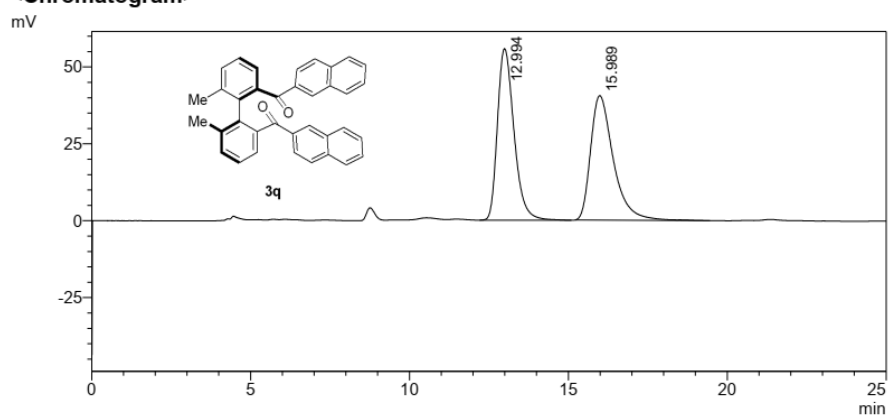

## <Peak Table>

Detector A Channel 1 254nm

| Peak# | Ret. Time | Area    | Height | Conc.  | Unit | Mark | Name |
|-------|-----------|---------|--------|--------|------|------|------|
| 1     | 12.994    | 2022663 | 55787  | 50.102 |      |      |      |
| 2     | 15.989    | 2014432 | 40458  | 49.898 |      |      |      |
| Total |           | 4037094 | 96245  |        |      |      |      |

# <Chromatogram>

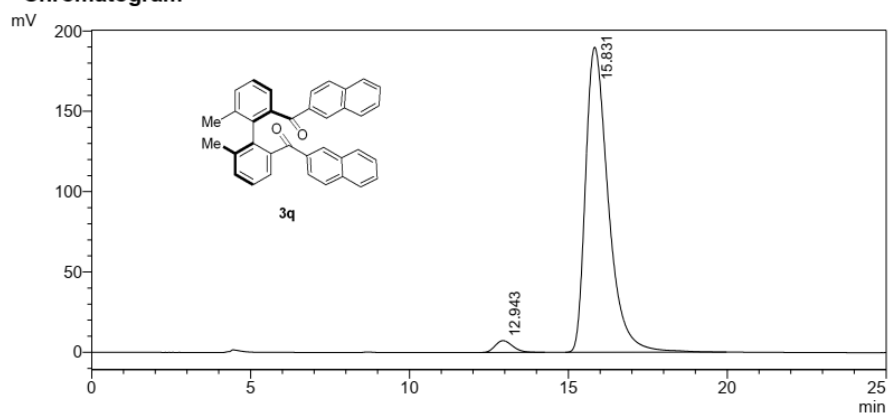

## <Peak Table>

Detector A Channel 1 254nm

| Peak# | Ret. Time | Area    | Height | Conc.  | Unit | Mark | Name |
|-------|-----------|---------|--------|--------|------|------|------|
| 1     | 12.943    | 281601  | 7316   | 2.888  |      |      |      |
| 2     | 15.831    | 9469953 | 189857 | 97.112 |      |      |      |
| Total |           | 9751554 | 197174 |        |      |      |      |

<Chromatogram>

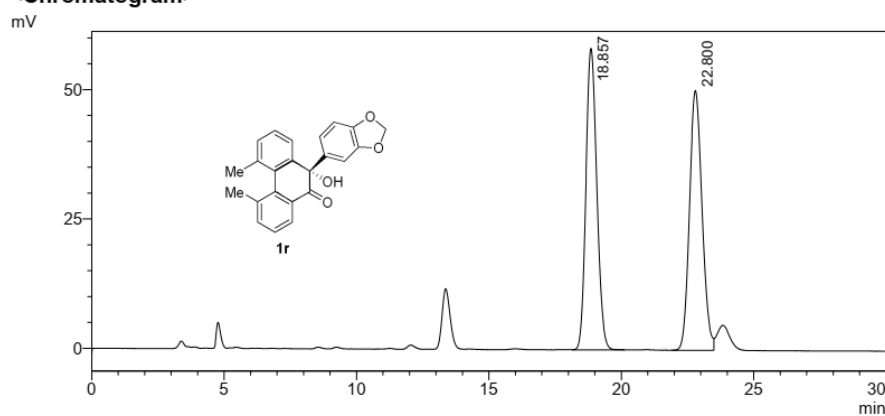

<Peak Table>

Detector A Channel 1 254nm

| Peak# | Ret. Time | Area    | Height | Conc.  | Unit | Mark | Name |
|-------|-----------|---------|--------|--------|------|------|------|
| 1     | 18.857    | 1659765 | 58248  | 50.000 |      |      |      |
| 2     | 22.800    | 1659765 | 50209  | 50.000 |      |      |      |
| Total |           | 3319530 | 108457 |        |      |      |      |

<Chromatogram>

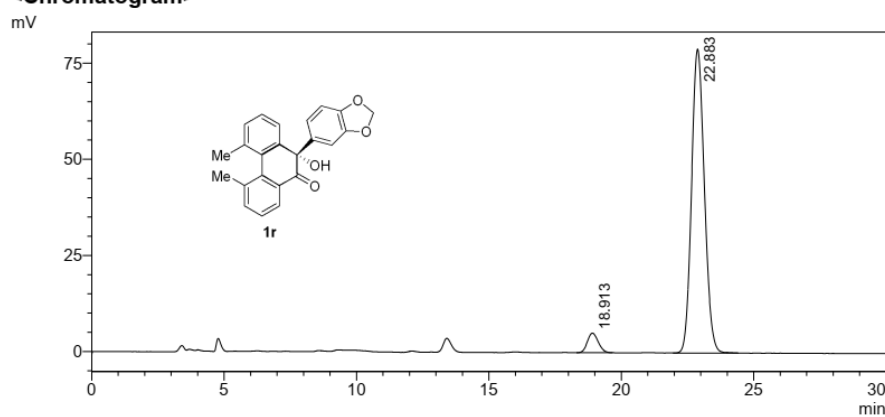

<Peak Table>

Detector A Channel 1 254nm

| Peak# | Ret. Time | Area    | Height | Conc.  | Unit | Mark | Name |
|-------|-----------|---------|--------|--------|------|------|------|
| 1     | 18.913    | 145520  | 5095   | 5.184  |      |      |      |
| 2     | 22.883    | 2661513 | 79027  | 94.816 |      |      |      |
| Total |           | 2807033 | 84122  |        |      |      |      |



# <Chromatogram>

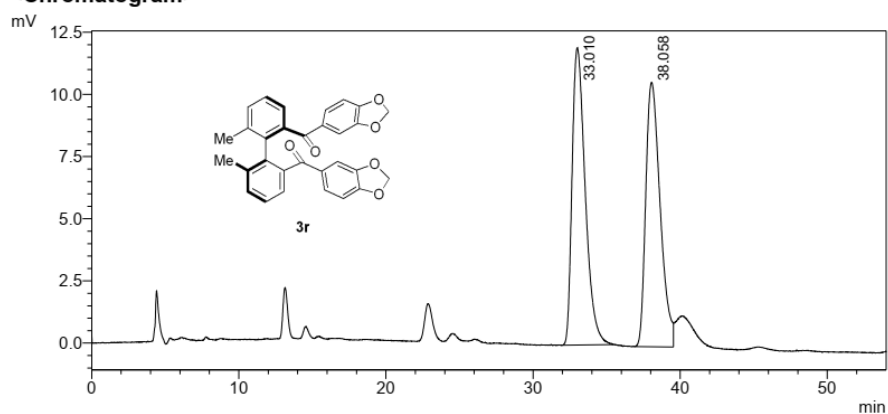

# <Peak Table>

Detector A Channel 1 254nm

| Peak# | Ret. Time | Area    | Height | Conc.  | Unit | Mark | Name |
|-------|-----------|---------|--------|--------|------|------|------|
| 1     | 33.010    | 743404  | 11950  | 50.719 |      |      |      |
| 2     | 38.058    | 722321  | 10633  | 49.281 |      |      |      |
| Total |           | 1465725 | 22583  |        |      |      |      |

# <Chromatogram>

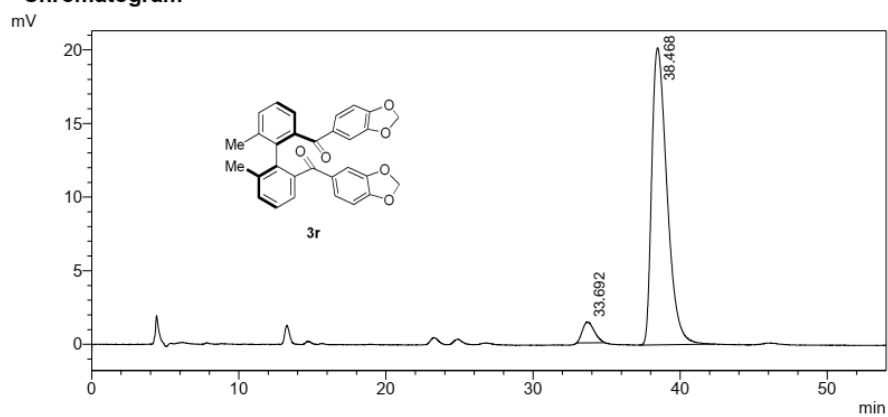

# <Peak Table>

Detector A Channel 1 254nm

| Peak# | Ret. Time | Area    | Height | Conc.  | Unit | Mark | Name |
|-------|-----------|---------|--------|--------|------|------|------|
| 1     | 33.692    | 78825   | 1421   | 5.139  |      |      |      |
| 2     | 38.468    | 1454901 | 20172  | 94.861 |      |      |      |
| Total |           | 1533726 | 21594  |        |      |      |      |

# <Chromatogram>

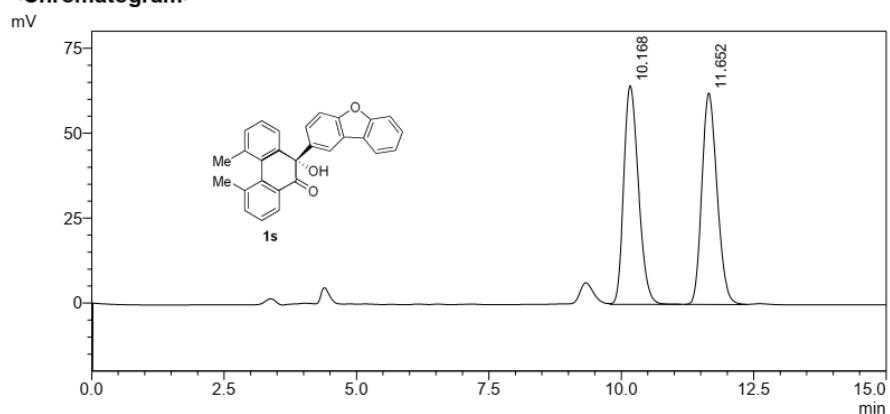

## <Peak Table>

Detector A Channel 1 254nm

| Peak# | Ret. Time | Area    | Height | Conc.  | Unit | Mark | Name |
|-------|-----------|---------|--------|--------|------|------|------|
| 1     | 10.168    | 1243517 | 64351  | 49.954 |      |      |      |
| 2     | 11.652    | 1245798 | 62216  | 50.046 |      |      |      |
| Total |           | 2489315 | 126566 |        |      |      |      |

# <Chromatogram>

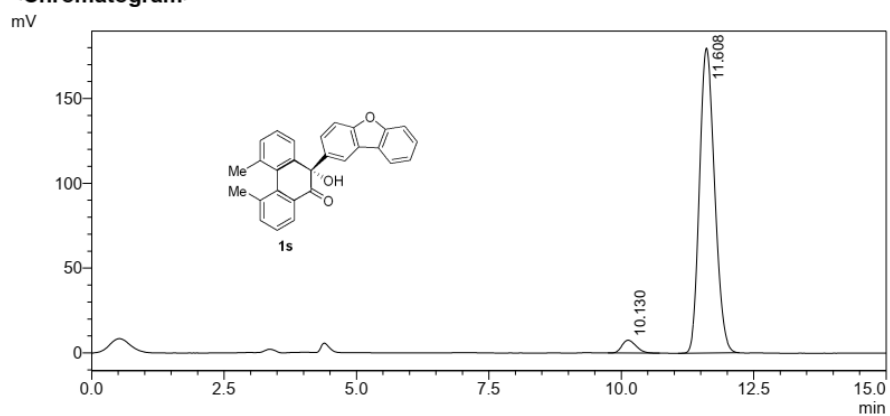

## <Peak Table>

Detector A Channel 1 254nm

| Peak# | Ret. Time | Area    | Height | Conc.  | Unit | Mark | Name |
|-------|-----------|---------|--------|--------|------|------|------|
| 1     | 10.130    | 141300  | 7556   | 3.795  |      |      |      |
| 2     | 11.608    | 3581819 | 179758 | 96.205 |      |      |      |
| Total |           | 3723119 | 187314 |        |      |      |      |

# <Chromatogram>

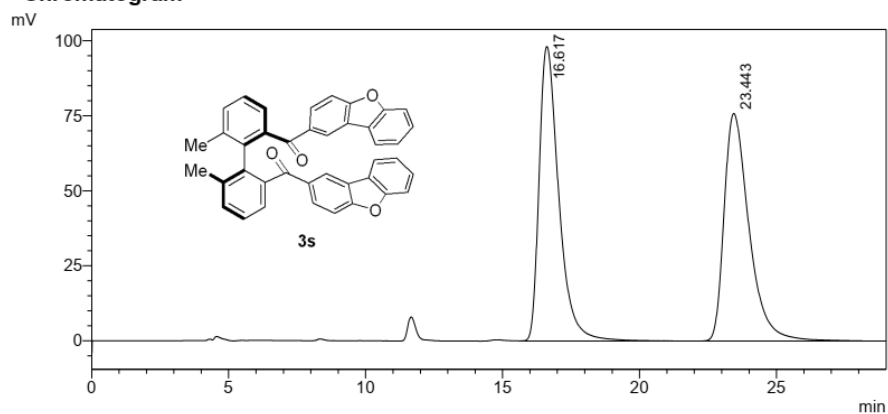

## <Peak Table>

Detector A Channel 1 254nm

| Peak# | Ret. Time | Area    | Height | Conc.  | Unit | Mark | Name |
|-------|-----------|---------|--------|--------|------|------|------|
| 1     | 16.617    | 4894659 | 98164  | 50.446 |      |      |      |
| 2     | 23.443    | 4808110 | 75849  | 49.554 |      |      |      |
| Total |           | 9702768 | 174014 |        |      |      |      |

# <Chromatogram>

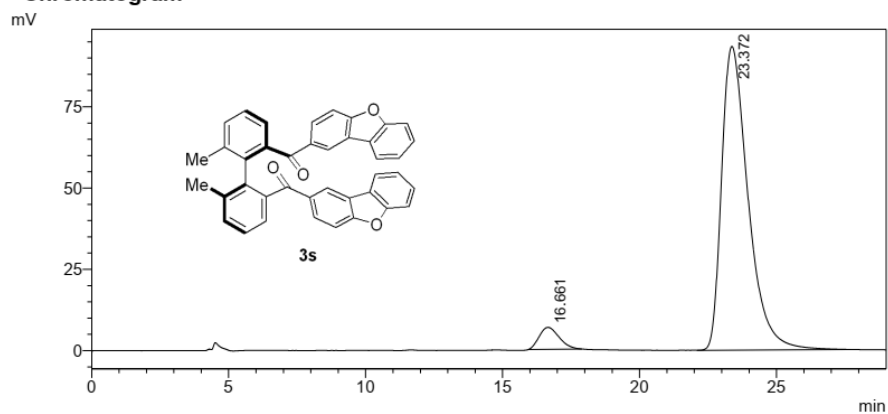

## <Peak Table>

Detector A Channel 1 254nm

| Peak# | Ret. Time | Area    | Height | Conc.  | Unit | Mark | Name |
|-------|-----------|---------|--------|--------|------|------|------|
| 1     | 16.661    | 338502  | 6718   | 5.115  |      |      |      |
| 2     | 23.372    | 6279906 | 93419  | 94.885 |      |      |      |
| Total |           | 6618408 | 100137 |        |      |      |      |

# <Chromatogram>

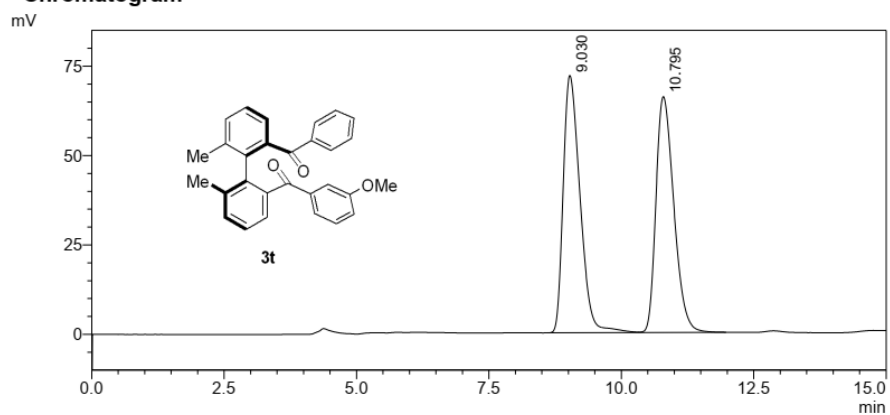

## <Peak Table>

Detector A Channel 1 254nm

| Peak# | Ret. Time | Area    | Height | Conc.  | Unit | Mark | Name |
|-------|-----------|---------|--------|--------|------|------|------|
| 1     | 9.030     | 1592299 | 71972  | 50.694 |      |      |      |
| 2     | 10.795    | 1548672 | 65973  | 49.306 |      |      |      |
| Total |           | 3140971 | 137945 |        |      |      |      |

# <Chromatogram>

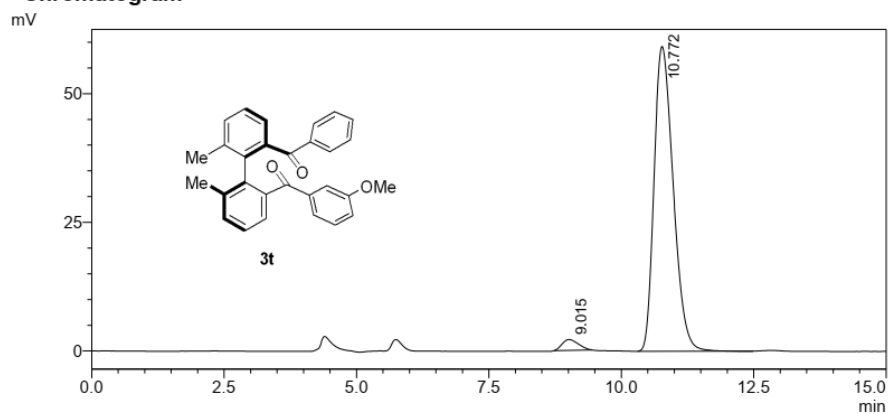

## <Peak Table>

Detector A Channel 1 254nm

| Peak# | Ret. Time | Area    | Height | Conc.  | Unit | Mark | Name |
|-------|-----------|---------|--------|--------|------|------|------|
| 1     | 9.015     | 44584   | 2098   | 2.906  |      |      |      |
| 2     | 10.772    | 1489785 | 59210  | 97.094 |      |      |      |
| Total |           | 1534370 | 61308  |        |      |      |      |

# <Chromatogram>

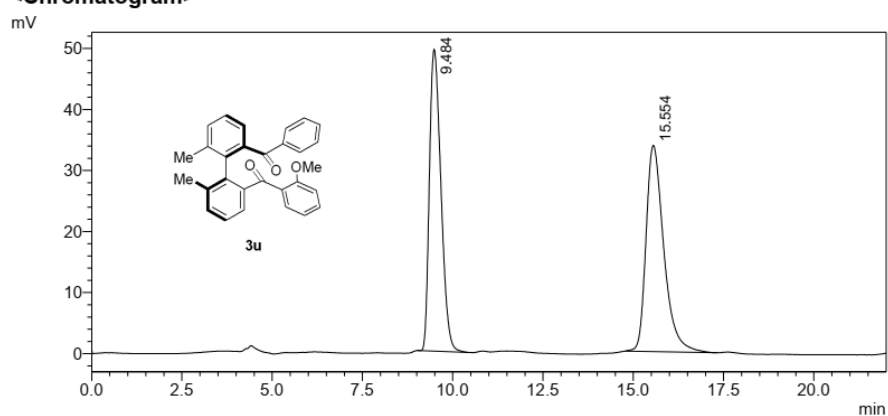

## <Peak Table>

Detector A Channel 1 254nm

| Peak# | Ret. Time | Area    | Height | Conc.  | Unit | Mark | Name |
|-------|-----------|---------|--------|--------|------|------|------|
| 1     | 9.484     | 1097094 | 49441  | 48.704 |      |      |      |
| 2     | 15.554    | 1155486 | 33767  | 51.296 |      |      |      |
| Total |           | 2252580 | 83208  |        |      |      |      |

# <Chromatogram>

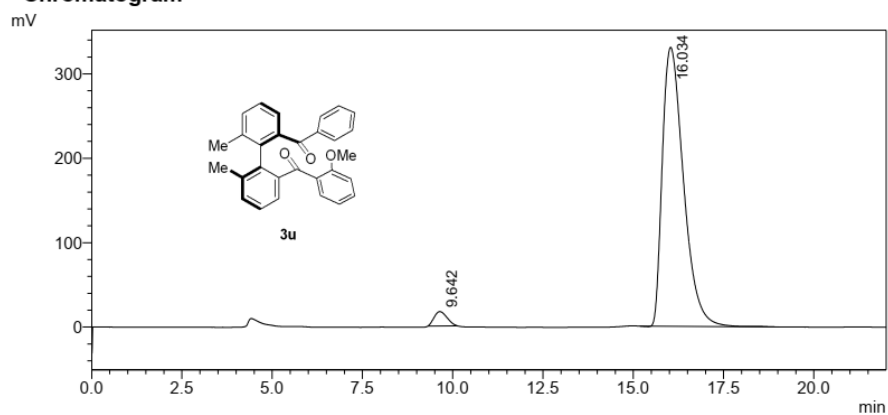

## <Peak Table>

Detector A Channel 1 254nm

| Peak# | Ret. Time | Area     | Height | Conc.  | Unit | Mark | Name |
|-------|-----------|----------|--------|--------|------|------|------|
| 1     | 9.642     | 421988   | 17027  | 3.032  |      |      |      |
| 2     | 16.034    | 13493722 | 330655 | 96.968 |      |      |      |
| Total |           | 13915710 | 347682 |        |      |      |      |

# <Chromatogram>

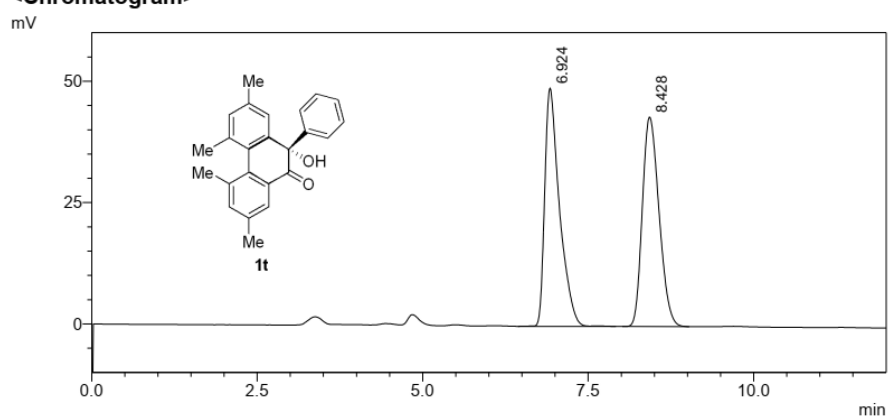

## <Peak Table>

Detector A Channel 1 254nm

| Peak# | Ret. Time | Area    | Height | Conc.  | Unit | Mark | Name |
|-------|-----------|---------|--------|--------|------|------|------|
| 1     | 6.924     | 758957  | 49057  | 50.052 |      |      |      |
| 2     | 8.428     | 757367  | 43132  | 49.948 |      |      |      |
| Total |           | 1516323 | 92189  |        |      |      |      |

# <Chromatogram>

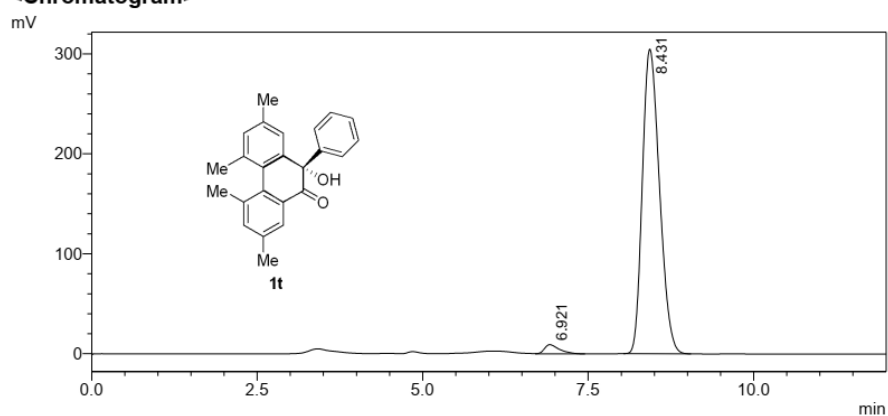

## <Peak Table>

Detector A Channel 1 254nm

| Peak# | Ret. Time | Area    | Height | Conc.  | Unit | Mark | Name |
|-------|-----------|---------|--------|--------|------|------|------|
| 1     | 6.921     | 144859  | 9292   | 2.571  |      |      |      |
| 2     | 8.431     | 5488625 | 304570 | 97.429 |      |      |      |
| Total |           | 5633484 | 313862 |        |      |      |      |

# <Chromatogram>

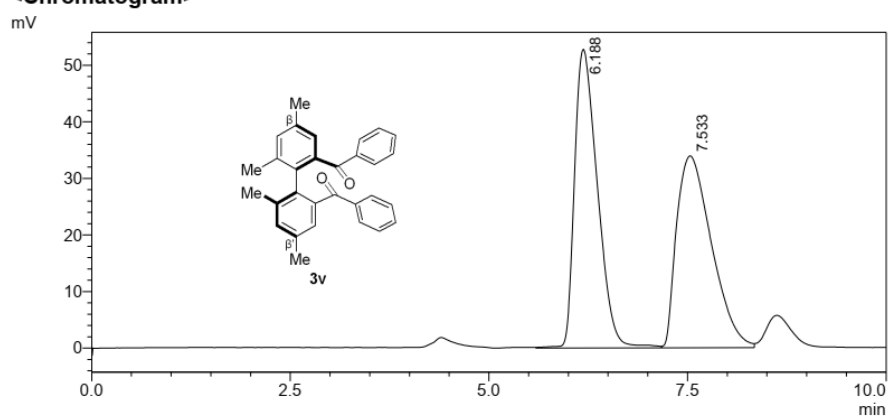

## <Peak Table>

Detector A Channel 1 254nm

| Peak# | Ret. Time | Area    | Height | Conc.  | Unit | Mark | Name |
|-------|-----------|---------|--------|--------|------|------|------|
| 1     | 6.188     | 1057723 | 52753  | 50.505 |      |      |      |
| 2     | 7.533     | 1036572 | 33919  | 49.495 |      |      |      |
| Total |           | 2094295 | 86672  |        |      |      |      |

# <Chromatogram>

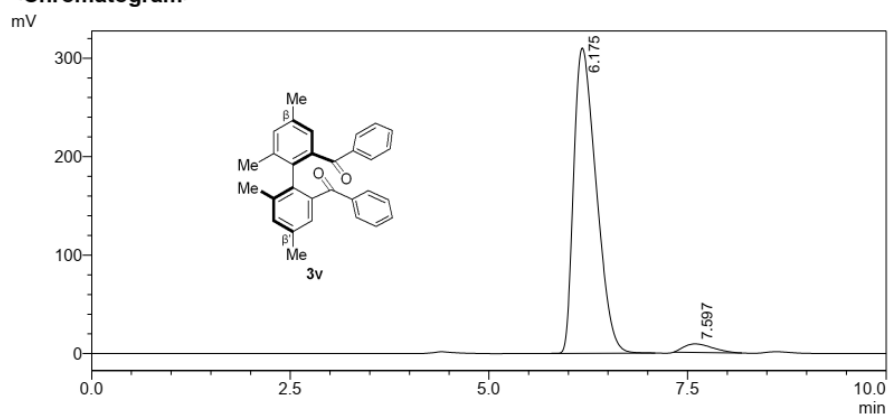

## <Peak Table>

Detector A Channel 1 254nm

| Peak# | Ret. Time | Area    | Height | Conc.  | Unit | Mark | Name |
|-------|-----------|---------|--------|--------|------|------|------|
| 1     | 6.175     | 6100256 | 310008 | 96.528 |      |      |      |
| 2     | 7.597     | 219444  | 8684   | 3.472  |      |      |      |
| Total |           | 6319700 | 318692 |        |      |      |      |

# <Chromatogram>

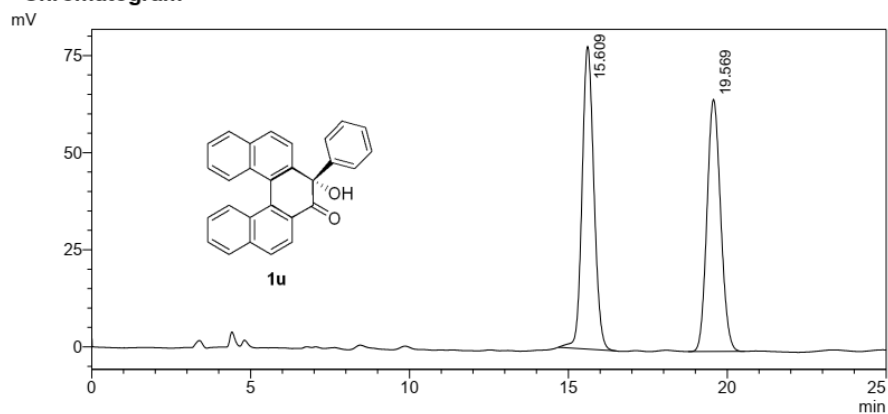

## <Peak Table>

Detector A Channel 1 254nm

| Peak# | Ret. Time | Area    | Height | Conc.  | Unit | Mark | Name |
|-------|-----------|---------|--------|--------|------|------|------|
| 1     | 15.609    | 2012461 | 77908  | 50.903 |      |      |      |
| 2     | 19.569    | 1941074 | 64915  | 49.097 |      |      |      |
| Total |           | 3953535 | 142823 |        |      |      |      |

# <Chromatogram>

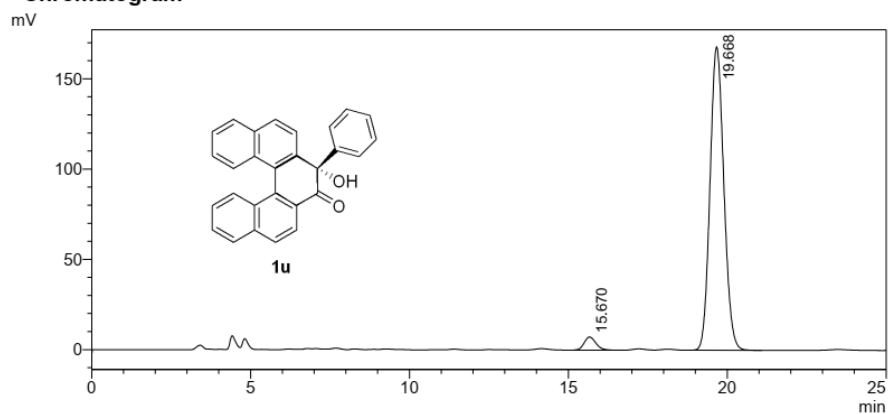

## <Peak Table>

Detector A Channel 1 254nm

| Peak# | Ret. Time | Area    | Height | Conc.  | Unit | Mark | Name |
|-------|-----------|---------|--------|--------|------|------|------|
| 1     | 15.670    | 187318  | 7266   | 3.549  |      |      |      |
| 2     | 19.668    | 5090215 | 168053 | 96.451 |      |      |      |
| Total |           | 5277534 | 175319 |        |      |      |      |



# <Chromatogram>

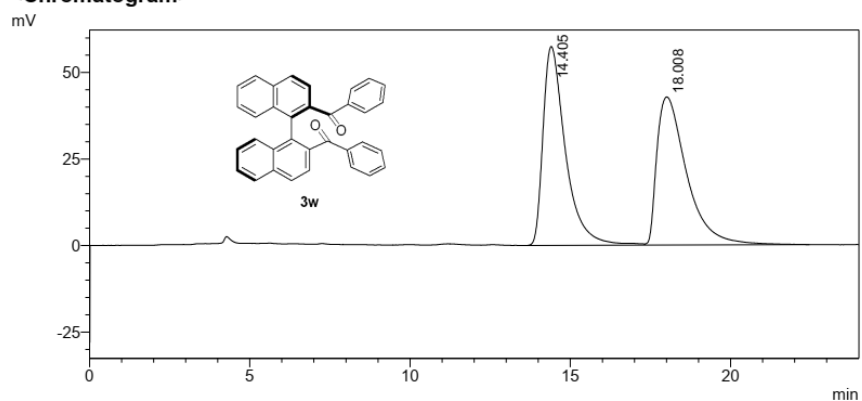

## <Peak Table>

Detector A Channel 1 254nm

| Peak# | Ret. Time | Area    | Height | Conc.  | Unit | Mark | Name |
|-------|-----------|---------|--------|--------|------|------|------|
| 1     | 14.405    | 2798198 | 57473  | 50.285 |      |      |      |
| 2     | 18.008    | 2766520 | 42779  | 49.715 |      |      |      |
| Total |           | 5564718 | 100251 |        |      |      |      |

# <Chromatogram>

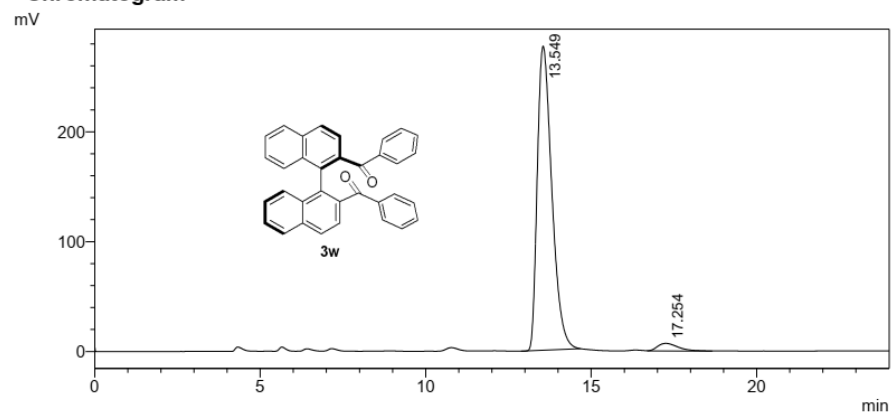

## <Peak Table>

Detector A Channel 1 254nm

| Peak# | Ret. Time | Area    | Height | Conc.  | Unit | Mark | Name |
|-------|-----------|---------|--------|--------|------|------|------|
| 1     | 13.549    | 8440868 | 276718 | 96.554 |      |      |      |
| 2     | 17.254    | 301238  | 6944   | 3.446  |      |      |      |
| Total |           | 8742106 | 283662 |        |      |      |      |

# <Chromatogram>

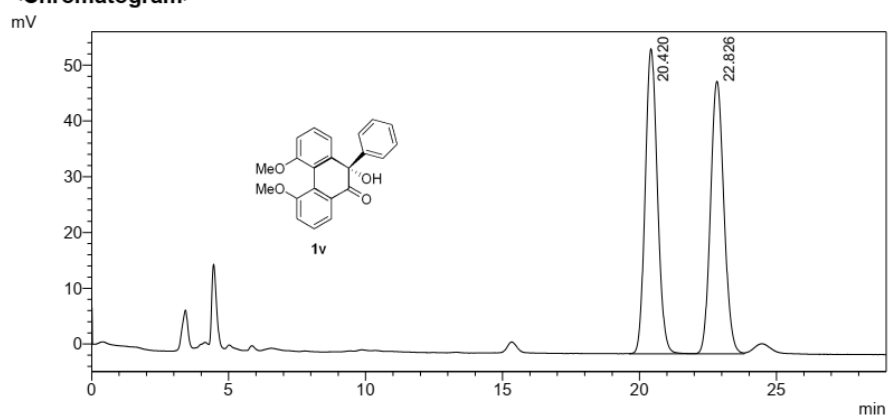

## <Peak Table>

Detector A Channel 1 254nm

| Peak# | Ret. Time | Area    | Height | Conc.  | Unit | Mark | Name |
|-------|-----------|---------|--------|--------|------|------|------|
| 1     | 20.420    | 1691778 | 54666  | 50.414 |      |      |      |
| 2     | 22.826    | 1663972 | 48848  | 49.586 |      |      |      |
| Total |           | 3355750 | 103514 |        |      |      |      |

# <Chromatogram>

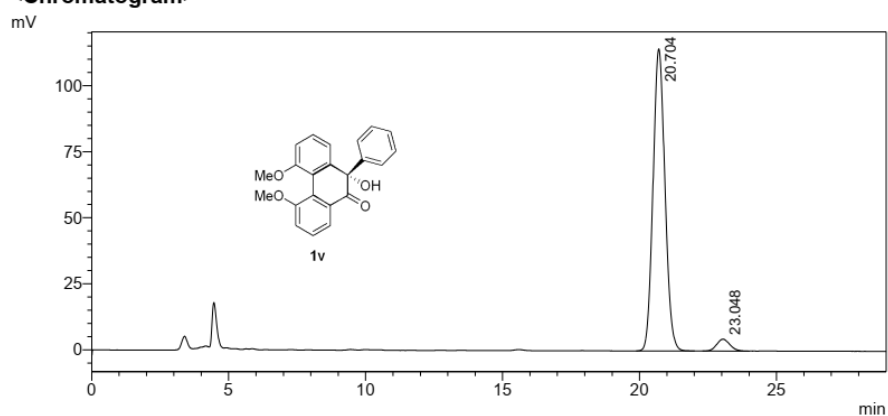

## <Peak Table>

Detector A Channel 1 254nm

| Peak# | Ret. Time | Area    | Height | Conc.  | Unit | Mark | Name |
|-------|-----------|---------|--------|--------|------|------|------|
| 1     | 20.704    | 3469505 | 114320 | 95.850 |      |      |      |
| 2     | 23.048    | 150223  | 4487   | 4.150  |      |      |      |
| Total |           | 3619728 | 118807 |        |      |      |      |

# <Chromatogram>

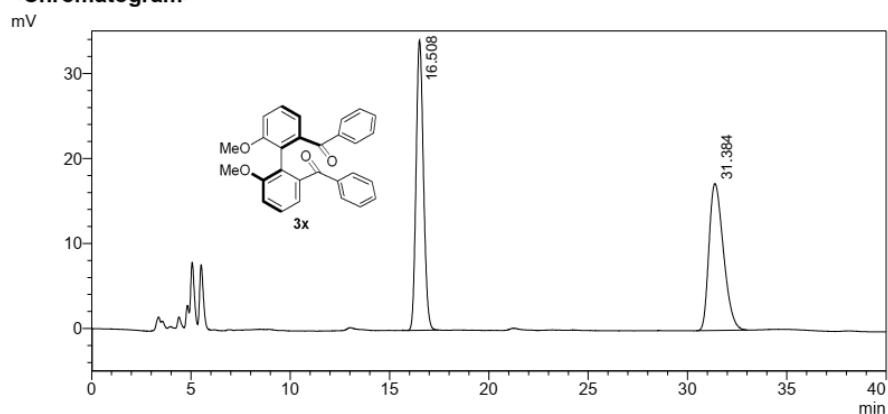

## <Peak Table>

Detector A Channel 1 210nm

| Peak# | Ret. Time | Area    | Height | Conc.  | Unit | Mark | Name |
|-------|-----------|---------|--------|--------|------|------|------|
| 1     | 16.508    | 880851  | 34137  | 50.152 |      |      |      |
| 2     | 31.384    | 875509  | 17294  | 49.848 |      |      |      |
| Total |           | 1756360 | 51431  |        |      |      |      |

# <Chromatogram>

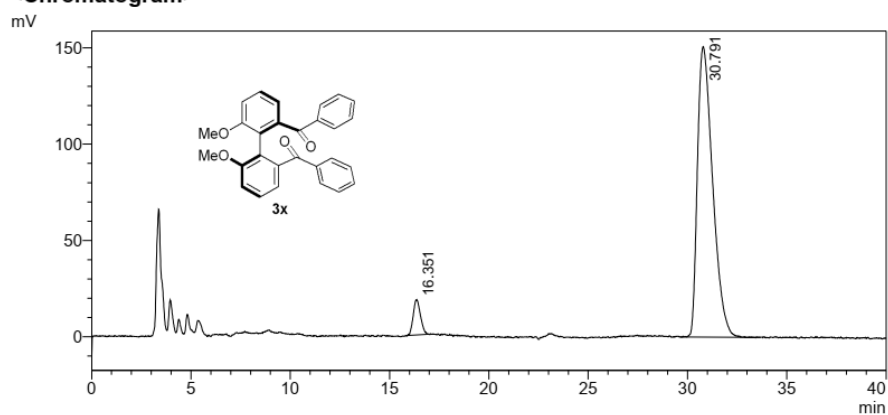

## <Peak Table>

Detector A Channel 2 210nm

| Peak# | Ret. Time | Area    | Height | Conc.  | Unit | Mark | Name |
|-------|-----------|---------|--------|--------|------|------|------|
| 1     | 16.351    | 464575  | 18195  | 5.474  |      |      |      |
| 2     | 30.791    | 8022900 | 150817 | 94.526 |      |      |      |
| Total |           | 8487475 | 169013 |        |      |      |      |

# <Chromatogram>

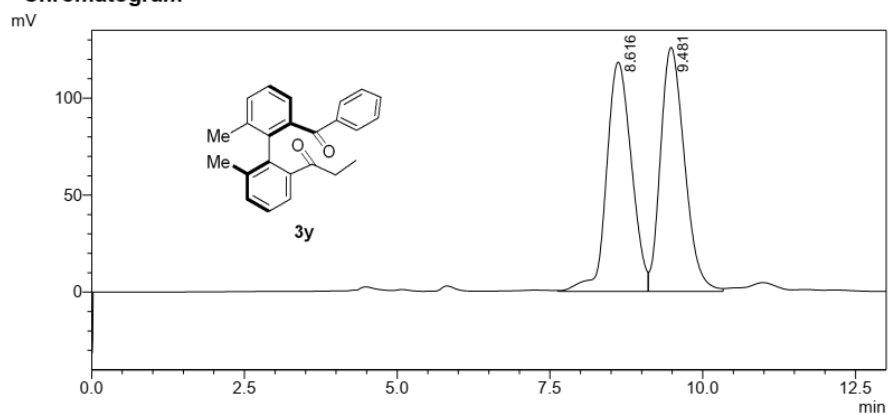

## <Peak Table>

Detector A Channel 1 254nm

| Peak# | Ret. Time | Area    | Height | Conc.  | Unit | Mark | Name |
|-------|-----------|---------|--------|--------|------|------|------|
| 1     | 8.616     | 3348777 | 118261 | 49.331 |      |      |      |
| 2     | 9.481     | 3439577 | 125829 | 50.669 |      |      |      |
| Total |           | 6788354 | 244090 |        |      |      |      |

# <Chromatogram>

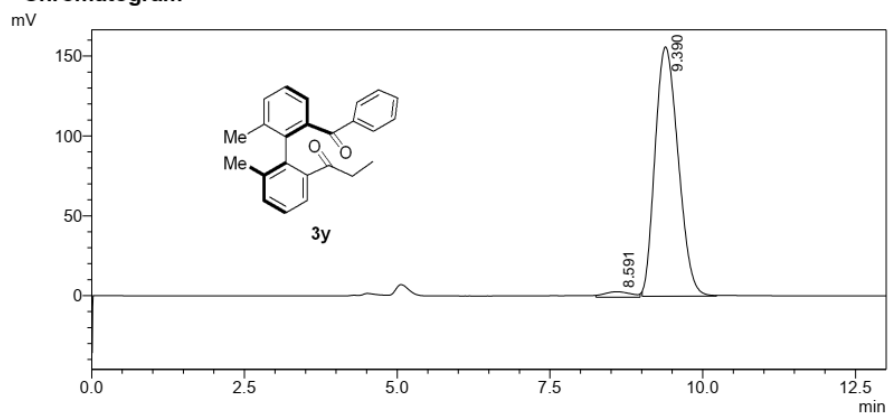

## <Peak Table>

Detector A Channel 1 254nm

| Peak# | Ret. Time | Area    | Height | Conc.  | Unit | Mark | Name |
|-------|-----------|---------|--------|--------|------|------|------|
| 1     | 8.591     | 107068  | 3442   | 2.537  |      |      |      |
| 2     | 9.390     | 4112820 | 156161 | 97.463 |      |      |      |
| Total |           | 4219888 | 159603 |        |      |      |      |

# <Chromatogram>

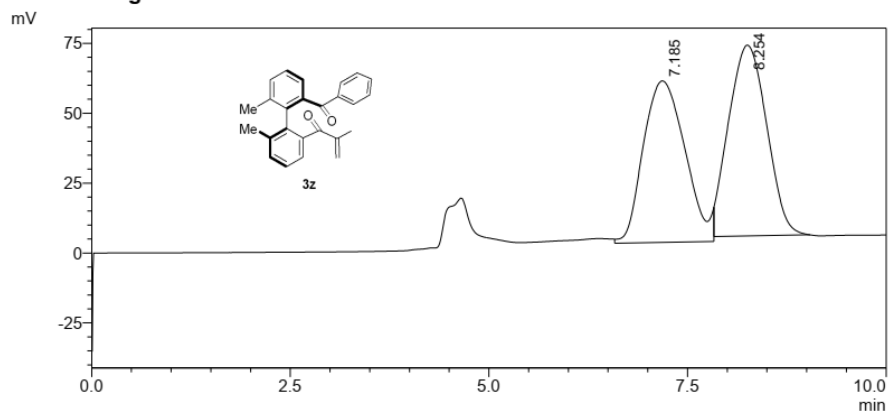

## <Peak Table>

Detector A Channel 1 254nm

| Peak# | Ret. Time | Area    | Height | Conc.  | Unit | Mark | Name |
|-------|-----------|---------|--------|--------|------|------|------|
| 1     | 7.185     | 2120854 | 57778  | 48.296 |      |      |      |
| 2     | 8.254     | 2270535 | 68199  | 51.704 |      |      |      |
| Total |           | 4391390 | 125977 |        |      |      |      |

# <Chromatogram>

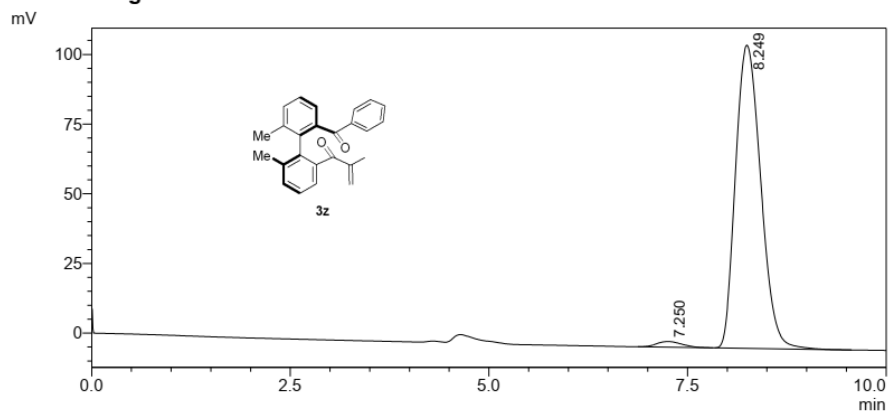

## <Peak Table>

Detector A Channel 1 254nm

| Peak# | Ret. Time | Area    | Height | Conc.  | Unit | Mark | Name |
|-------|-----------|---------|--------|--------|------|------|------|
| 1     | 7.250     | 44587   | 2013   | 1.822  |      |      |      |
| 2     | 8.249     | 2403005 | 108789 | 98.178 |      |      |      |
| Total |           | 2447592 | 110802 |        |      |      |      |

# <Chromatogram>

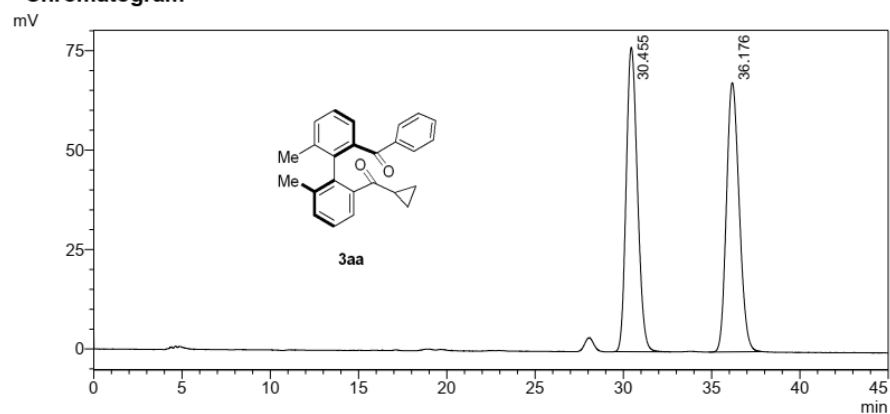

## <Peak Table>

Detector A Channel 1 254nm

| Peak# | Ret. Time | Area    | Height | Conc.  | Unit | Mark | Name |
|-------|-----------|---------|--------|--------|------|------|------|
| 1     | 30.455    | 3385735 | 76495  | 49.984 |      |      |      |
| 2     | 36.176    | 3387913 | 67677  | 50.016 |      |      |      |
| Total |           | 6773648 | 144172 |        |      |      |      |

# <Chromatogram>

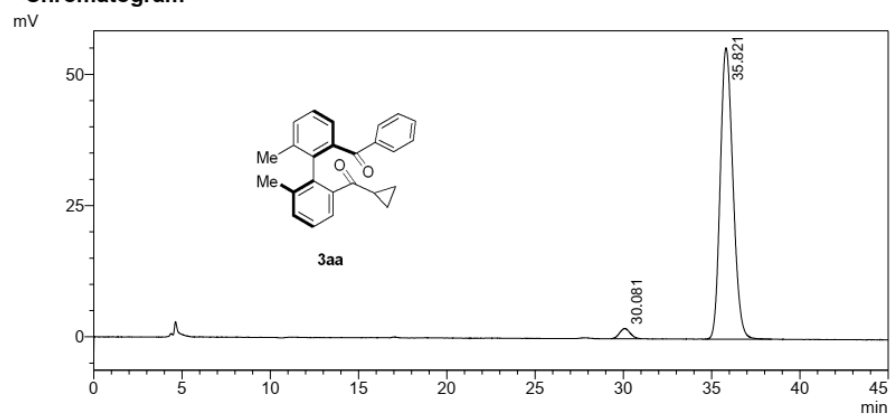

## <Peak Table>

Detector A Channel 1 254nm

| Peak# | Ret. Time | Area    | Height | Conc.  | Unit | Mark | Name |
|-------|-----------|---------|--------|--------|------|------|------|
| 1     | 30.081    | 81664   | 1947   | 2.858  |      |      |      |
| 2     | 35.821    | 2776071 | 55487  | 97.142 |      |      |      |
| Total |           | 2857735 | 57434  |        |      |      |      |

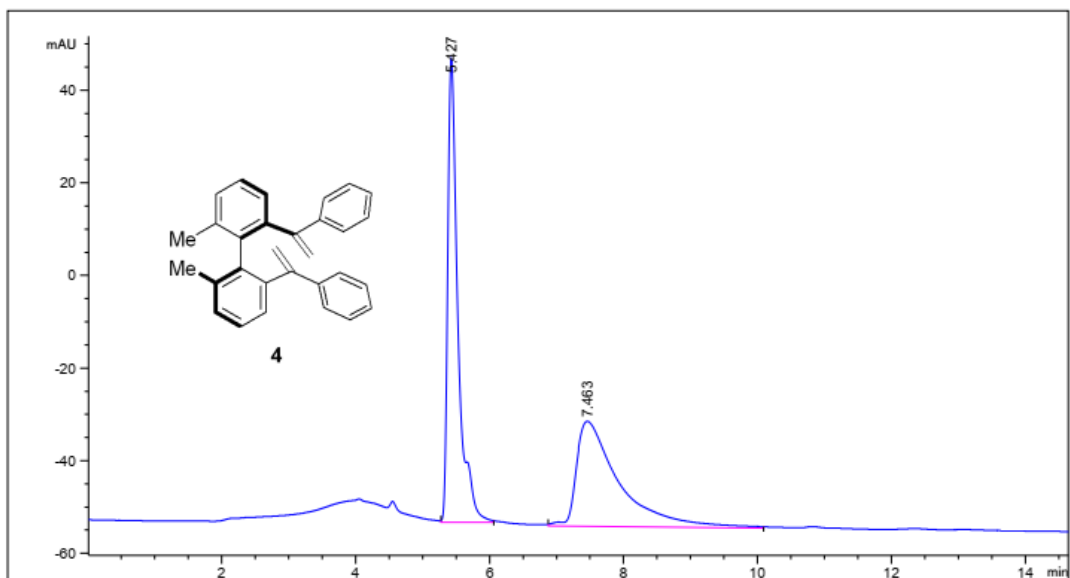

Signal 1: DAD1 A, Sig=254,4 Ref=360,100

| Peak # | RetTime [min] | Type | Width [min] | Area [mAU*s] | Height [mAU] | Area %  |
|--------|---------------|------|-------------|--------------|--------------|---------|
| 1      | 5.427         | MM   | 0.1776      | 1065.67090   | 100.02626    | 51.1863 |
| 2      | 7.463         | MM   | 0.7457      | 1016.27515   | 22.71397     | 48.8137 |

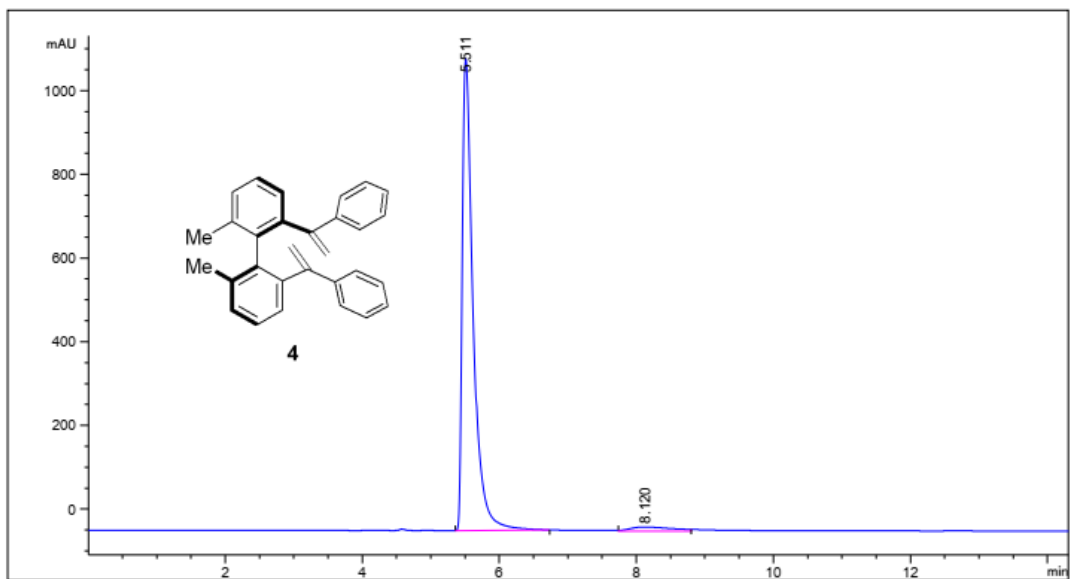

Signal 1: DAD1 A, Sig=254,4 Ref=360,100

| Peak # | RetTime [min] | Type | Width [min] | Area [mAU*s] | Height [mAU] | Area %  |
|--------|---------------|------|-------------|--------------|--------------|---------|
| 1      | 5.511         | BB   | 0.1684      | 1.26104e4    | 1128.08789   | 96.5156 |
| 2      | 8.120         | MM   | 0.7375      | 455.25446    | 10.28883     | 3.4844  |

# <Chromatogram>

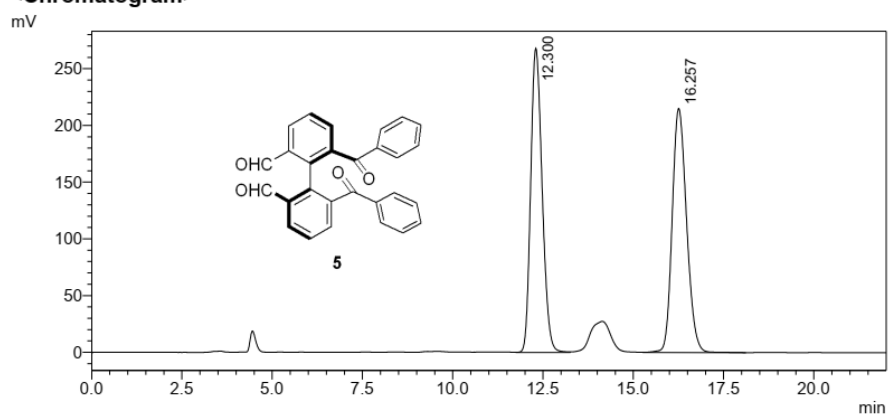

## <Peak Table>

Detector A Channel 1 254nm

| Peak# | Ret. Time | Area     | Height | Conc.  | Unit | Mark | Name |
|-------|-----------|----------|--------|--------|------|------|------|
| 1     | 12.300    | 5920567  | 268079 | 49.761 |      |      |      |
| 2     | 16.257    | 5977374  | 215171 | 50.239 |      |      |      |
| Total |           | 11897940 | 483250 |        |      |      |      |

# <Chromatogram>

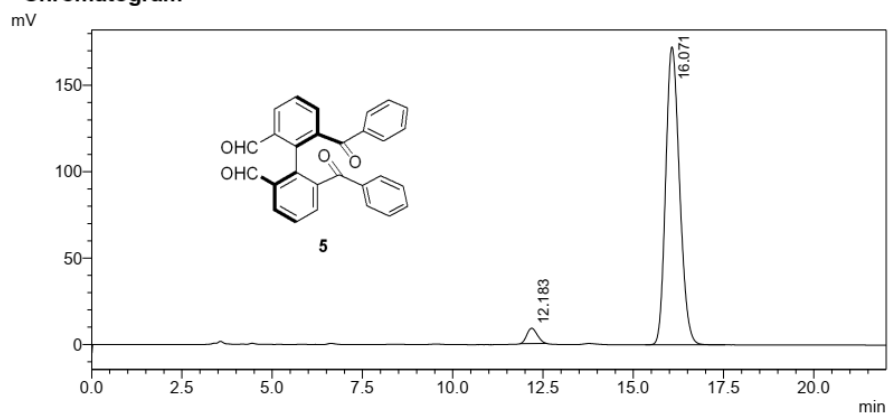

## <Peak Table>

Detector A Channel 1 254nm

| Peak# | Ret. Time | Area    | Height | Conc.  | Unit | Mark | Name |
|-------|-----------|---------|--------|--------|------|------|------|
| 1     | 12.183    | 179033  | 8870   | 3.740  |      |      |      |
| 2     | 16.071    | 4607472 | 172376 | 96.260 |      |      |      |
| Total |           | 4786505 | 181246 |        |      |      |      |



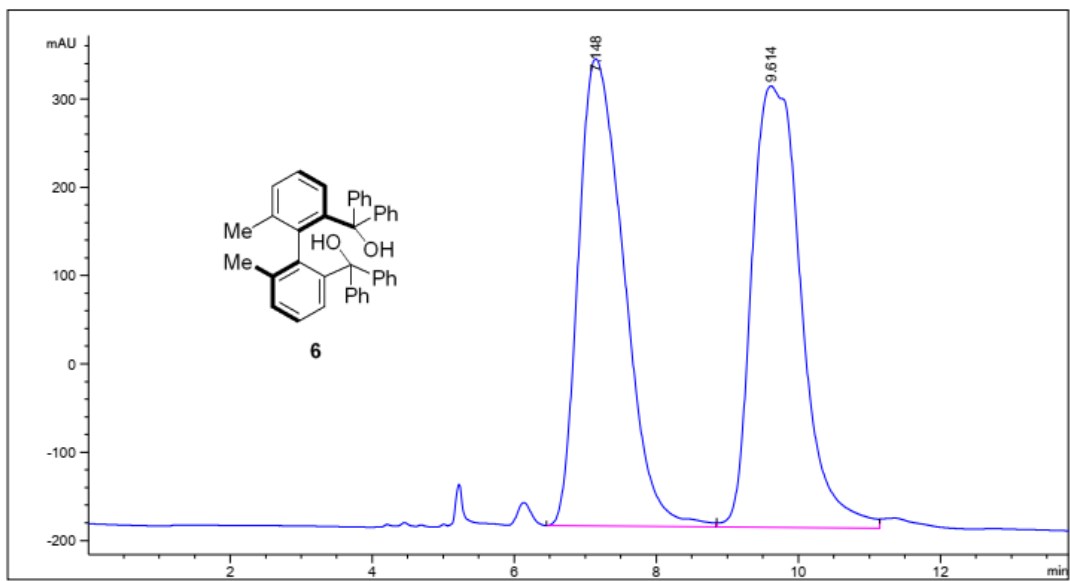

| Peak # | RetTime [min] | Type | Width [min] | Area [mAU*s] | Height [mAU] | Area %  |
|--------|---------------|------|-------------|--------------|--------------|---------|
| 1      | 7.148         | VB   | 0.7214      | 2.34489e4    | 528.77924    | 49.3565 |
| 2      | 9.614         | BB   | 0.6736      | 2.40604e4    | 499.83356    | 50.6435 |

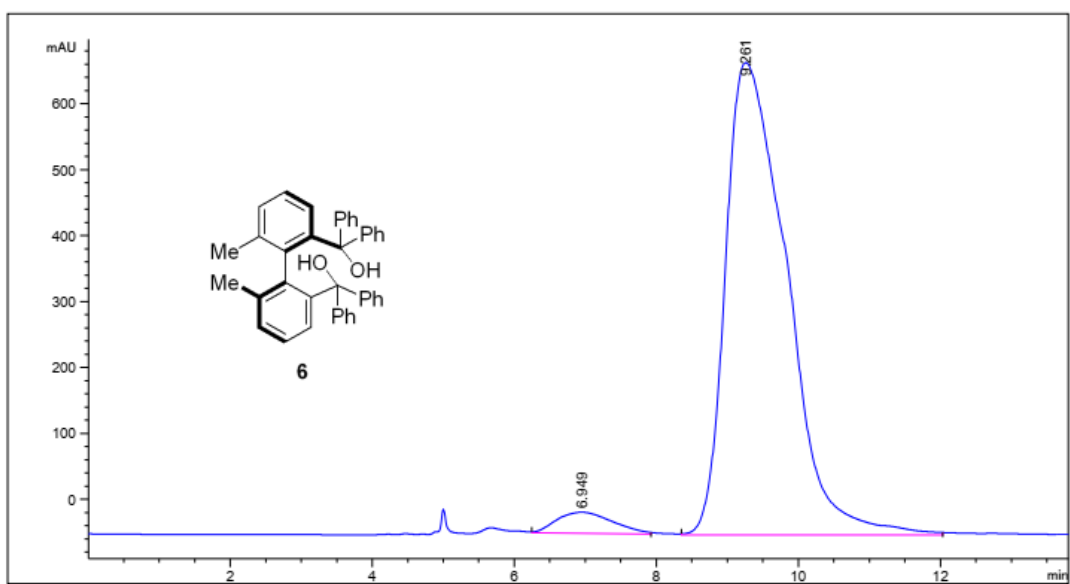

| Peak # | RetTime [min] | Type | Width [min] | Area [mAU*s] | Height [mAU] | Area %  |
|--------|---------------|------|-------------|--------------|--------------|---------|
| 1      | 6.949         | MM   | 0.9096      | 1745.80261   | 31.98970     | 3.9179  |
| 2      | 9.261         | MM   | 0.9957      | 4.28138e4    | 716.62024    | 96.0821 |
